# Supplementary material for: Discovery of N-sulfonylated aminosalicylic acids as dual MCL-1/BCL-xL inhibitors
Source: Royal Society of Chemistry journal article supplement (doi:10.1039/d2md00277a), 2022-10-27
Supplement: d2md00277a1.pdf [file d2md00277a1.pdf]

Sample Name:

Data Collected on:

400mr-vnmrs400

Archive directory:

Sample directory:

FidFile: PROTON

Pulse Sequence: PROTON (s2pul)

Solvent: dmsc

Data collected on: May 11 2016

Operator: work

Relax. delay 1.000 sec

Pulse 79.4 degrees

Acq. time 1.278 sec

Width 6410.3 Hz

Single scan

OBSERVE H1, 399.7531926 MHz

DATA PROCESSING

Line broadening 0.5 Hz

FT size 16384

Total time 0 min 2 sec

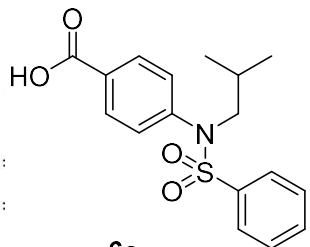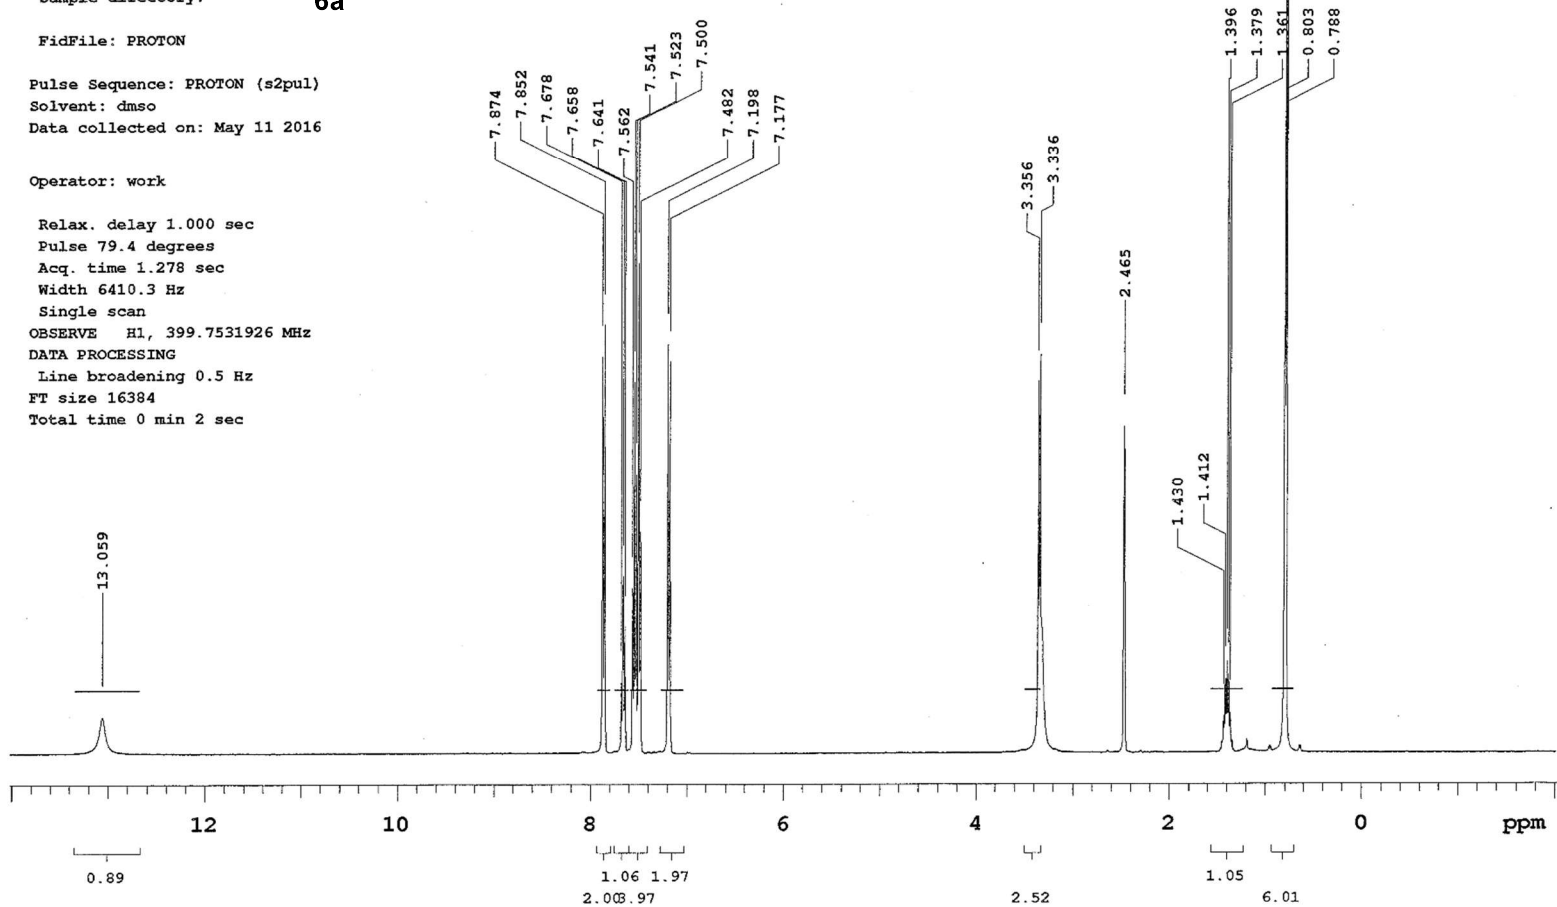

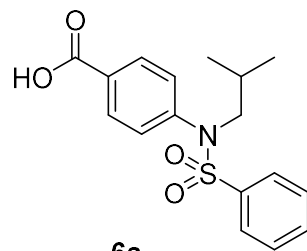

6a

Sample Name:

Data Collected on:

400mr-vmrs400

Archive directory:

Sample directory:

FidFile: CARBON

Pulse Sequence: CARBON (s2pul)

Solvent: dms0

Data collected on: May 11 2016

Operator: work

Relax. delay 1.000 sec

Pulse 58.1 degrees

Acq. time 0.813 sec

Width 24509.8 Hz

76 repetitions

OBSERVE C13, 100.5180202 MHz

DECOUPLE H1, 399.7551914 MHz

Power 39 dB

continuously on

WALTZ-16 modulated

DATA PROCESSING

Line broadening 3.0 Hz

FT size 32768

Total time 30 min

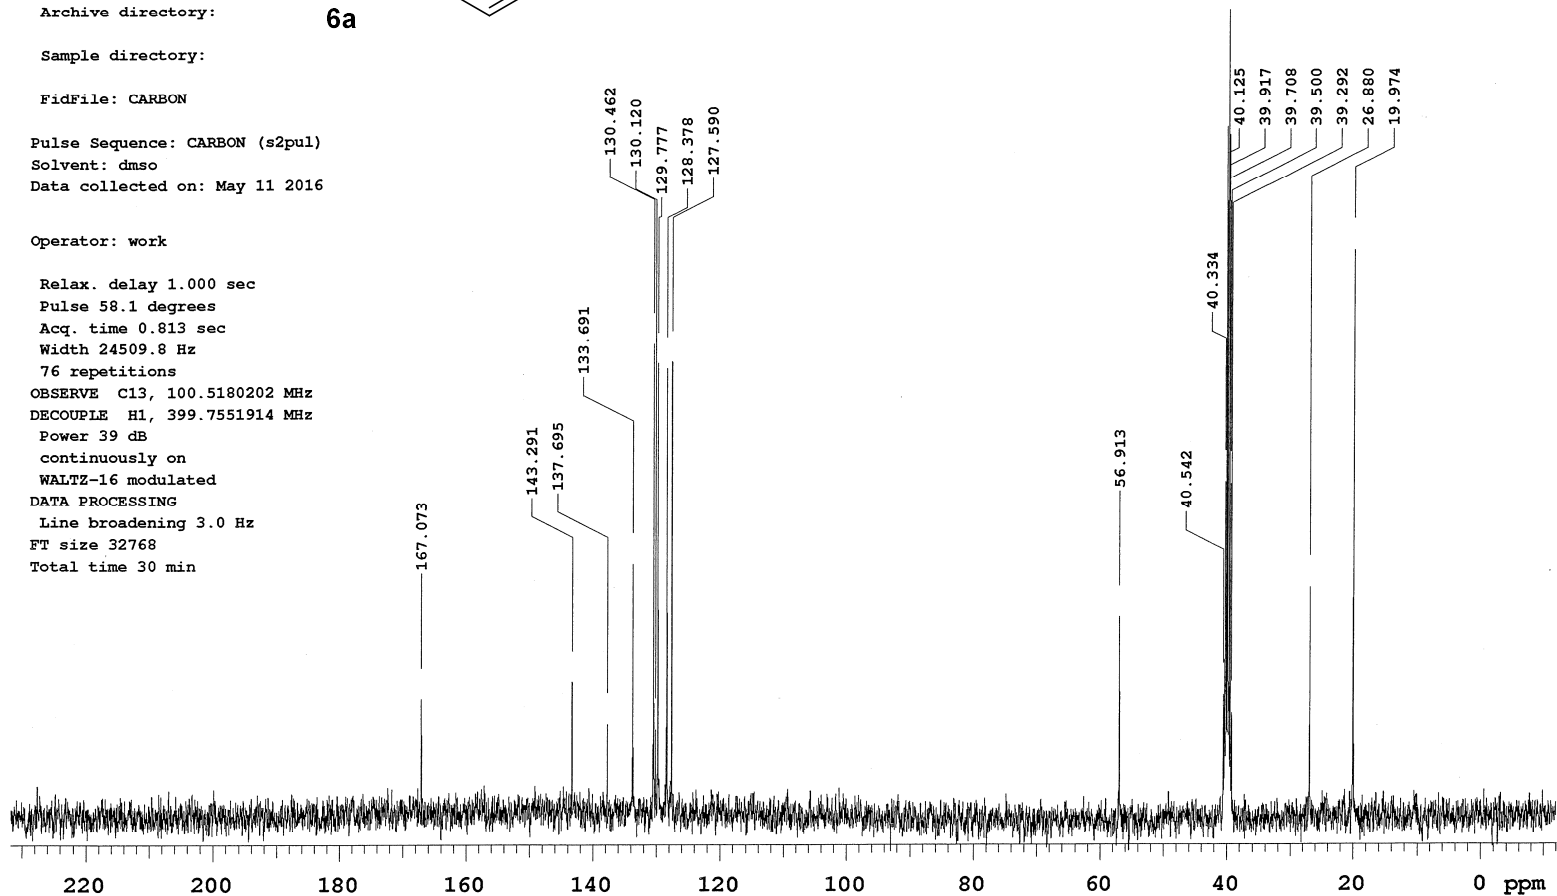

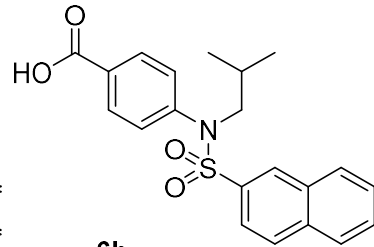

6b

Sample Name:

Data Collected on:

400mr-vmrns400

Archive directory:

Sample directory:

FidFile: PROTON

Pulse Sequence: PROTON (s2pul)

Solvent: dms0

Data collected on: May 11 2016

Operator: work

Relax. delay 1.000 sec

Pulse 79.4 degrees

Acq. time 1.278 sec

Width 6410.3 Hz

Single scan

OBSERVE H1, 399.7531926 MHz

DATA PROCESSING

Line broadening 0.5 Hz

FT size 16384

Total time 0 min 2 sec

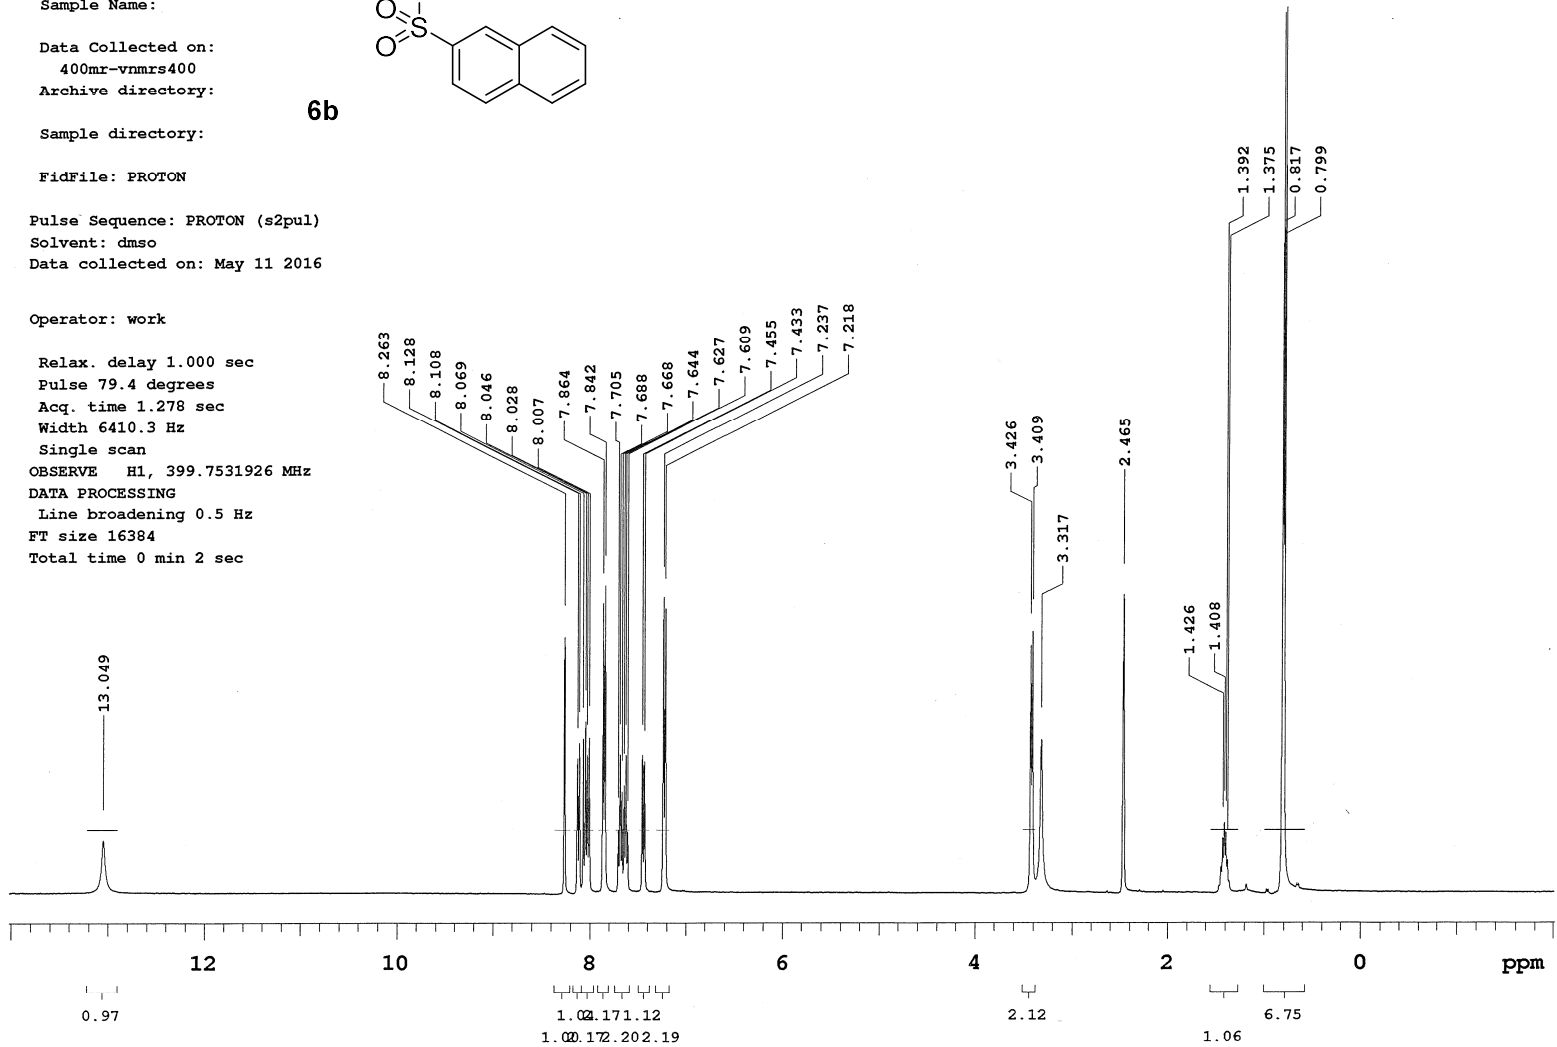

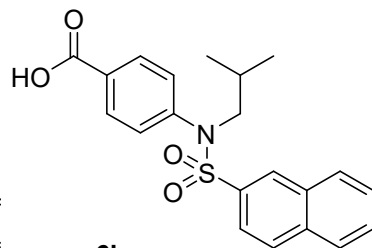

6b

Sample Name:

Data Collected on:

400mr-vnmrs400

Archive directory:

Sample directory:

FidFile: CARBON

Pulse Sequence: CARBON (s2pul)

Solvent: dms0

Data collected on: May 11 2016

Operator: work

Relax. delay 1.000 sec

Pulse 58.1 degrees

Acq. time 0.813 sec

Width 24509.8 Hz

84 repetitions

OBSERVE C13, 100.5180202 MHz

DECOUPLE H1, 399.7551914 MHz

Power 39 dB

continuously on

WALTZ-16 modulated

DATA PROCESSING

Line broadening 3.0 Hz

FT size 32768

Total time 30 min

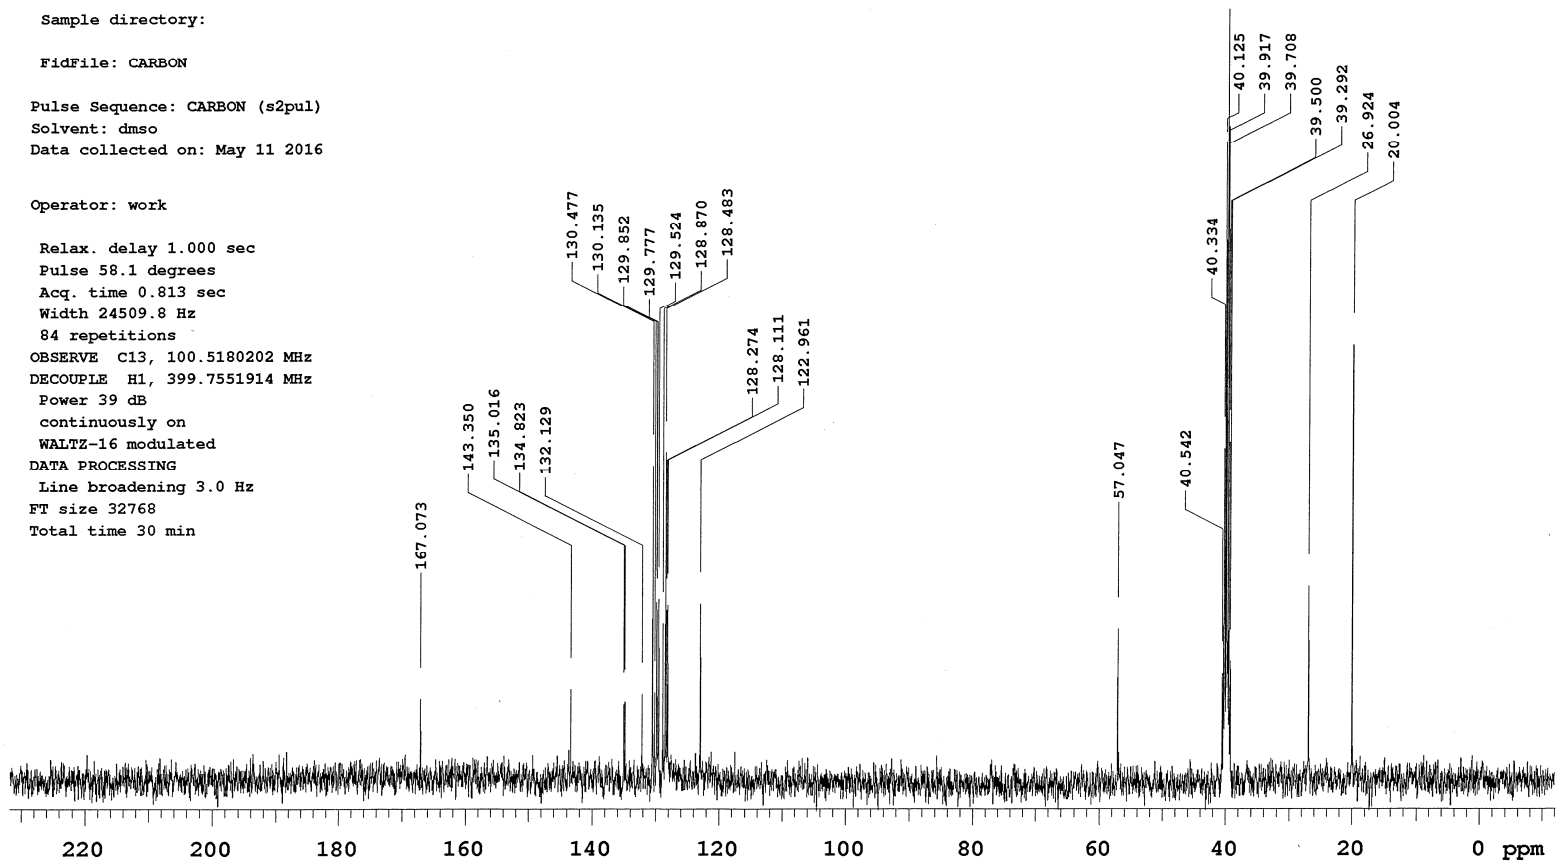

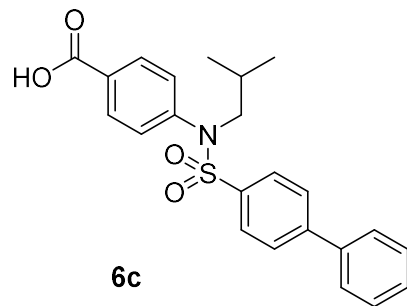

Sample Name:

Data Collected on:

400mr-vnmrs400

Archive directory:

Sample directory:

FidFile: PROTON

Pulse Sequence: PROTON (s2pul)

Solvent: dms0

Data collected on: May 11 2016

Operator: work

Relax. delay 1.000 sec

Pulse 79.4 degrees

Acq. time 1.278 sec

Width 6410.3 Hz

Single scan

OBSERVE H1, 399.7531926 MHz

DATA PROCESSING

Line broadening 0.5 Hz

FT size 16384

Total time 0 min 2 sec

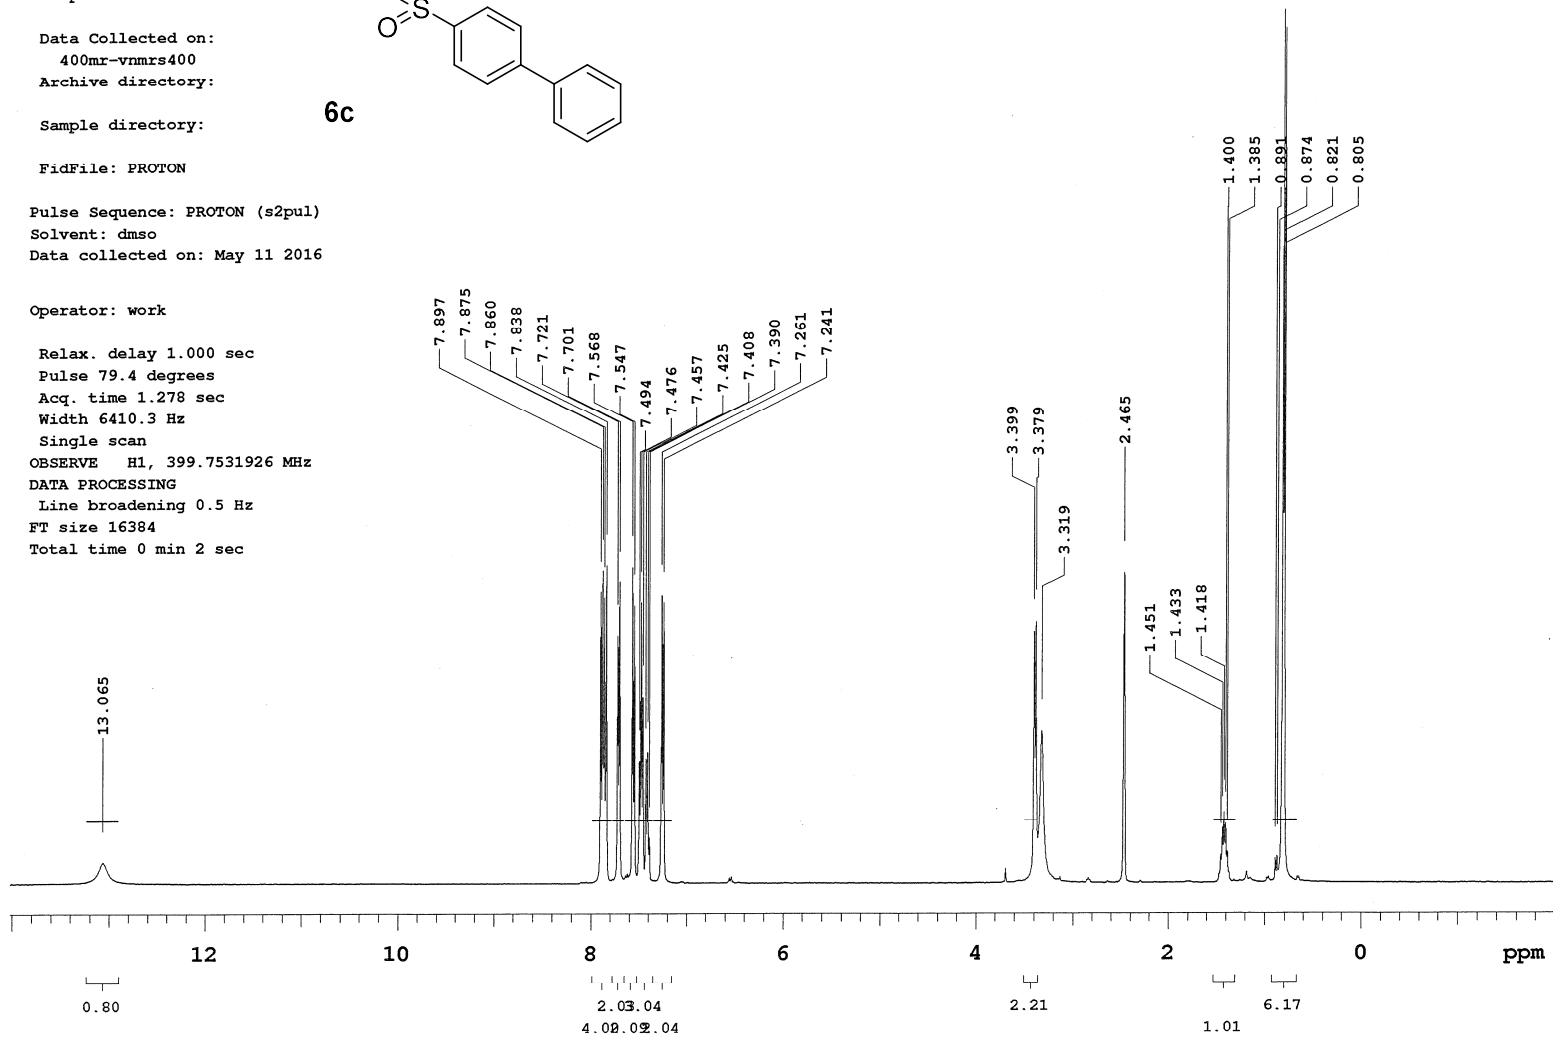

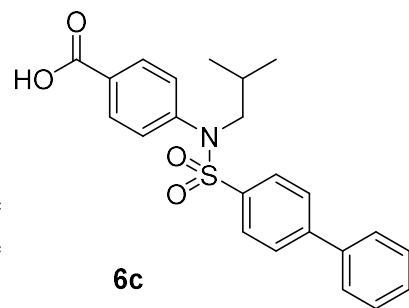

Sample Name:

Data Collected on:

400mr-vnmrs400

Archive directory:

Sample directory:

FidFile: CARBON

Pulse Sequence: CARBON (s2pul)

Solvent: dmsc

Data collected on: May 11 2016

Operator: work

Relax. delay 1.000 sec

Pulse 58.1 degrees

Acq. time 0.813 sec

Width 24509.8 Hz

120 repetitions

OBSERVE C13, 100.5180202 MHz

DECOUPLE H1, 399.7551914 MHz

Power 39 dB

continuously on

WALTZ-16 modulated

DATA PROCESSING

Line broadening 3.0 Hz

FT size 32768

Total time 30 min

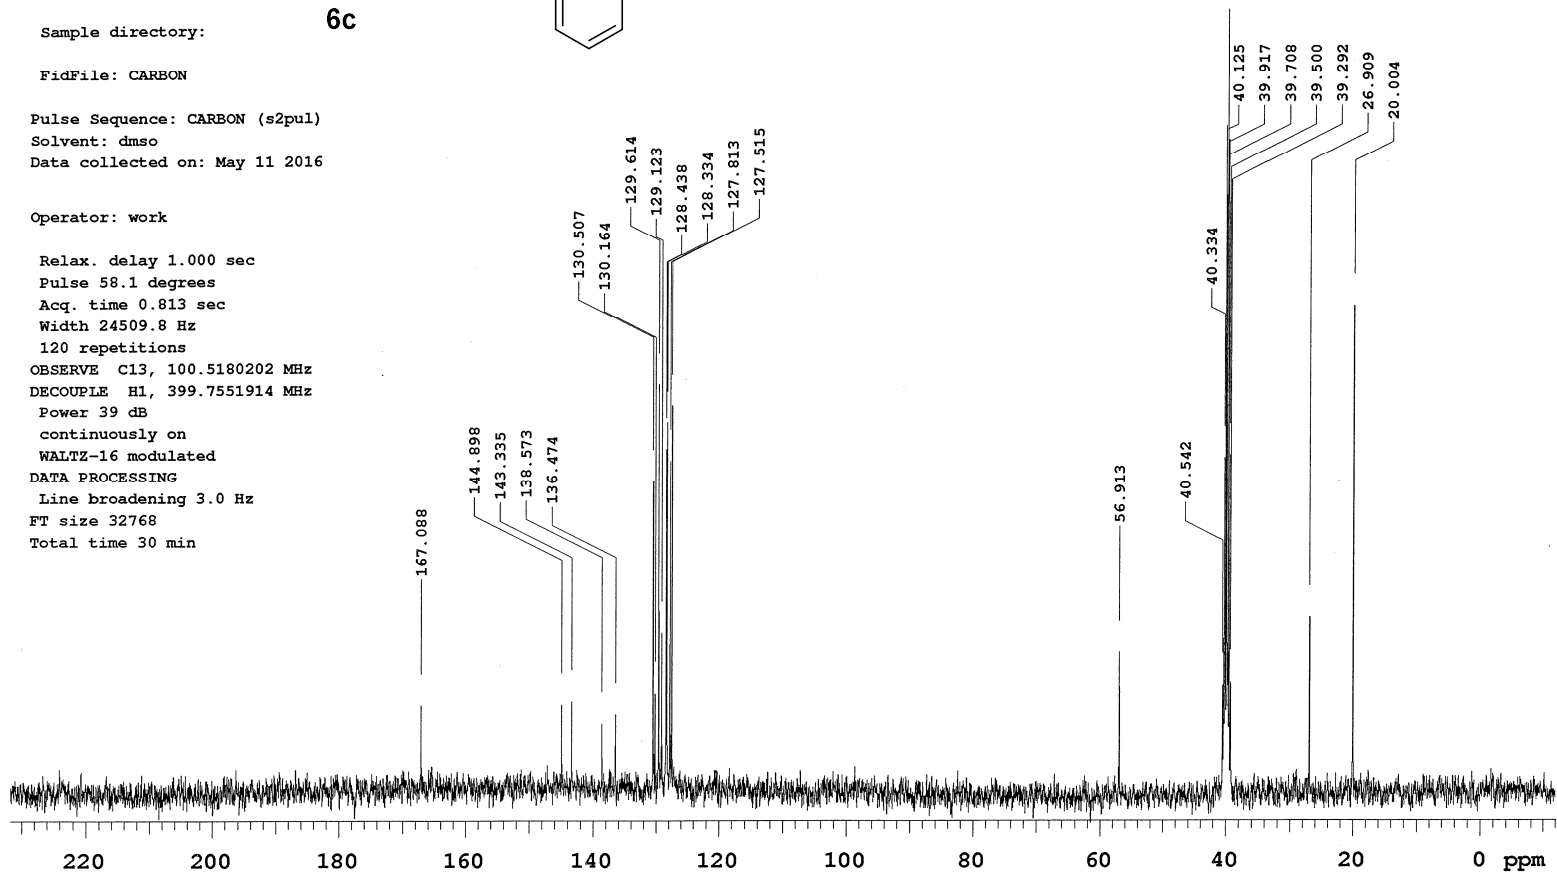

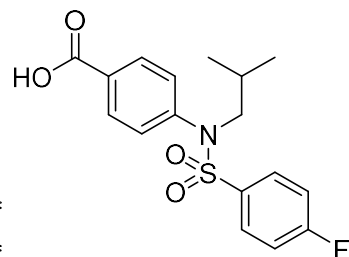

6d

Sample Name:

Data Collected on:  
400mr-vnmrs400  
Archive directory:

Sample directory:

FidFile: PROTON

Pulse Sequence: PROTON (s2pul)  
Solvent: dmsc  
Data collected on: May 11 2016

Operator: work

Relax. delay 1.000 sec  
Pulse 79.4 degrees  
Acq. time 1.278 sec  
Width 6410.3 Hz  
Single scan  
OBSERVE H1, 399.7531926 MHz  
DATA PROCESSING  
Line broadening 0.5 Hz  
FT size 16384  
Total time 0 min 2 sec

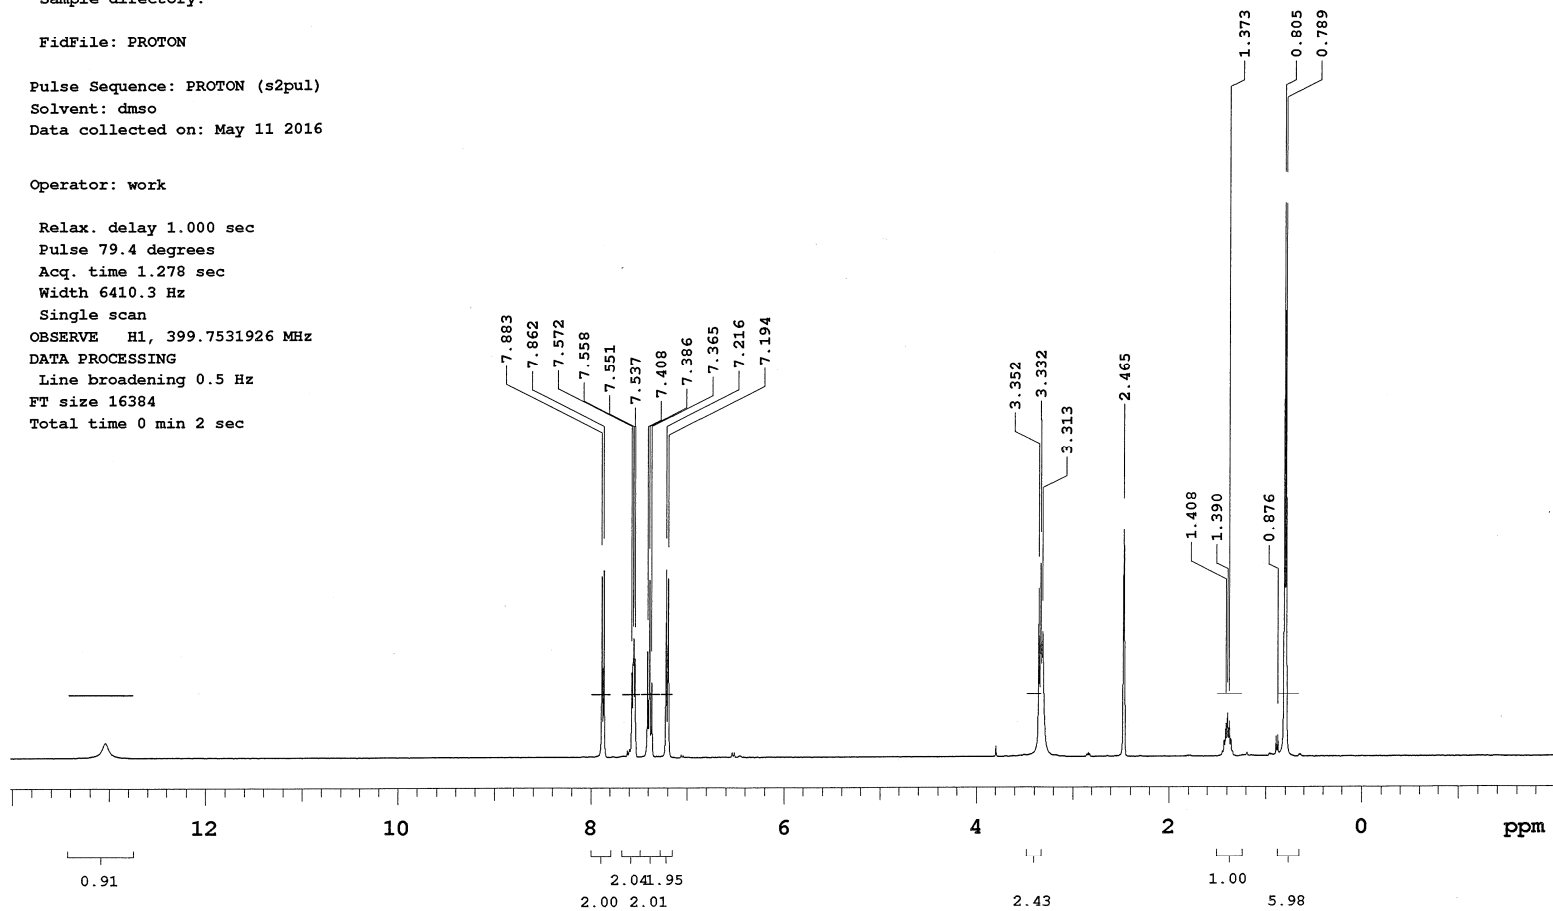

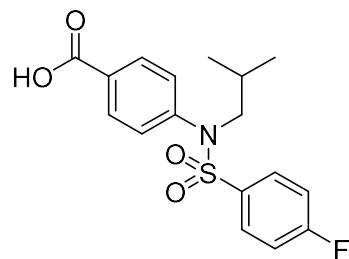

6d

Sample Name:

Data Collected on:

400mr-vnmrs400

Archive directory:

Sample directory:

FidFile: CARBON

Pulse Sequence: CARBON (s2pul)

Solvent: dms0

Data collected on: May 11 2016

Operator: work

Relax. delay 1.000 sec

Pulse 58.1 degrees

Acq. time 0.813 sec

Width 24509.8 Hz

192 repetitions

OBSERVE C13, 100.5180202 MHz

DECOUPLE H1, 399.7551914 MHz

Power 39 dB

continuously on

WALTZ-16 modulated

DATA PROCESSING

Line broadening 3.0 Hz

FT size 32768

Total time 30 min

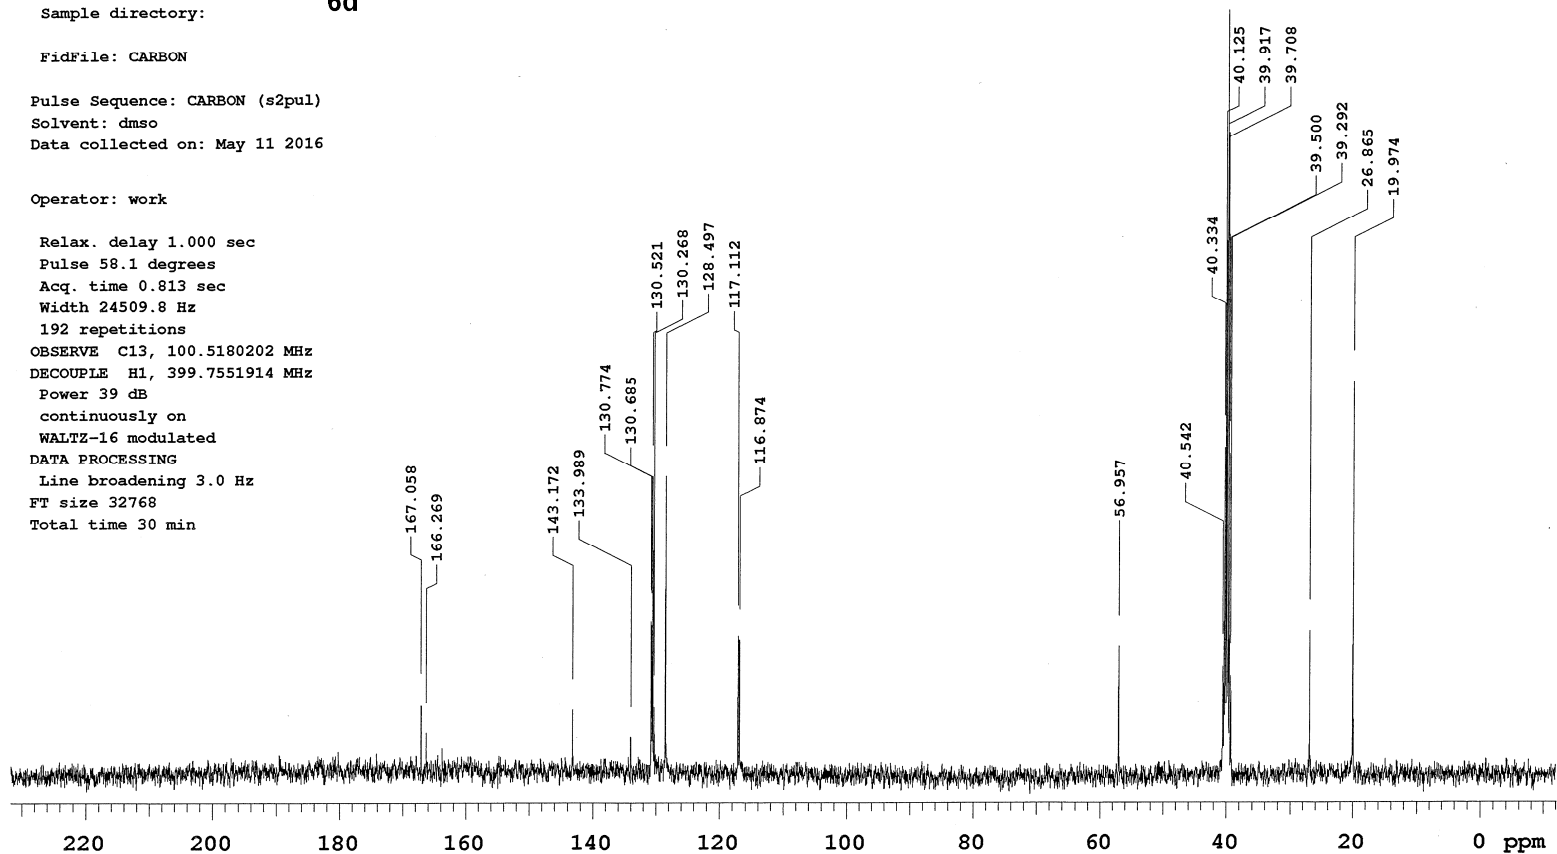



Sample Name:

Data Collected on:

400mr-vnmrs400

Archive directory:

Sample directory:

FidFile: PROTON

Pulse Sequence: PROTON (s2pul)

Solvent: dms0

Data collected on: May 11 2016

Operator: work

Relax. delay 1.000 sec

Pulse 79.4 degrees

Acq. time 1.278 sec

Width 6410.3 Hz

Single scan

OBSERVE H1, 399.7531926 MHz

DATA PROCESSING

Line broadening 0.5 Hz

FT size 16384

Total time 0 min 2 sec

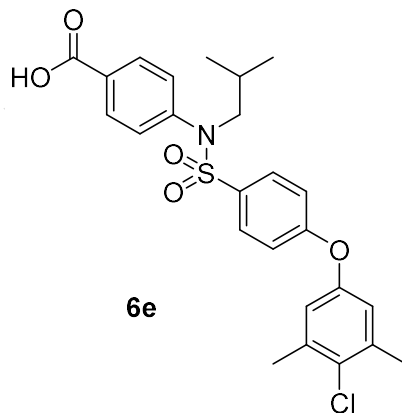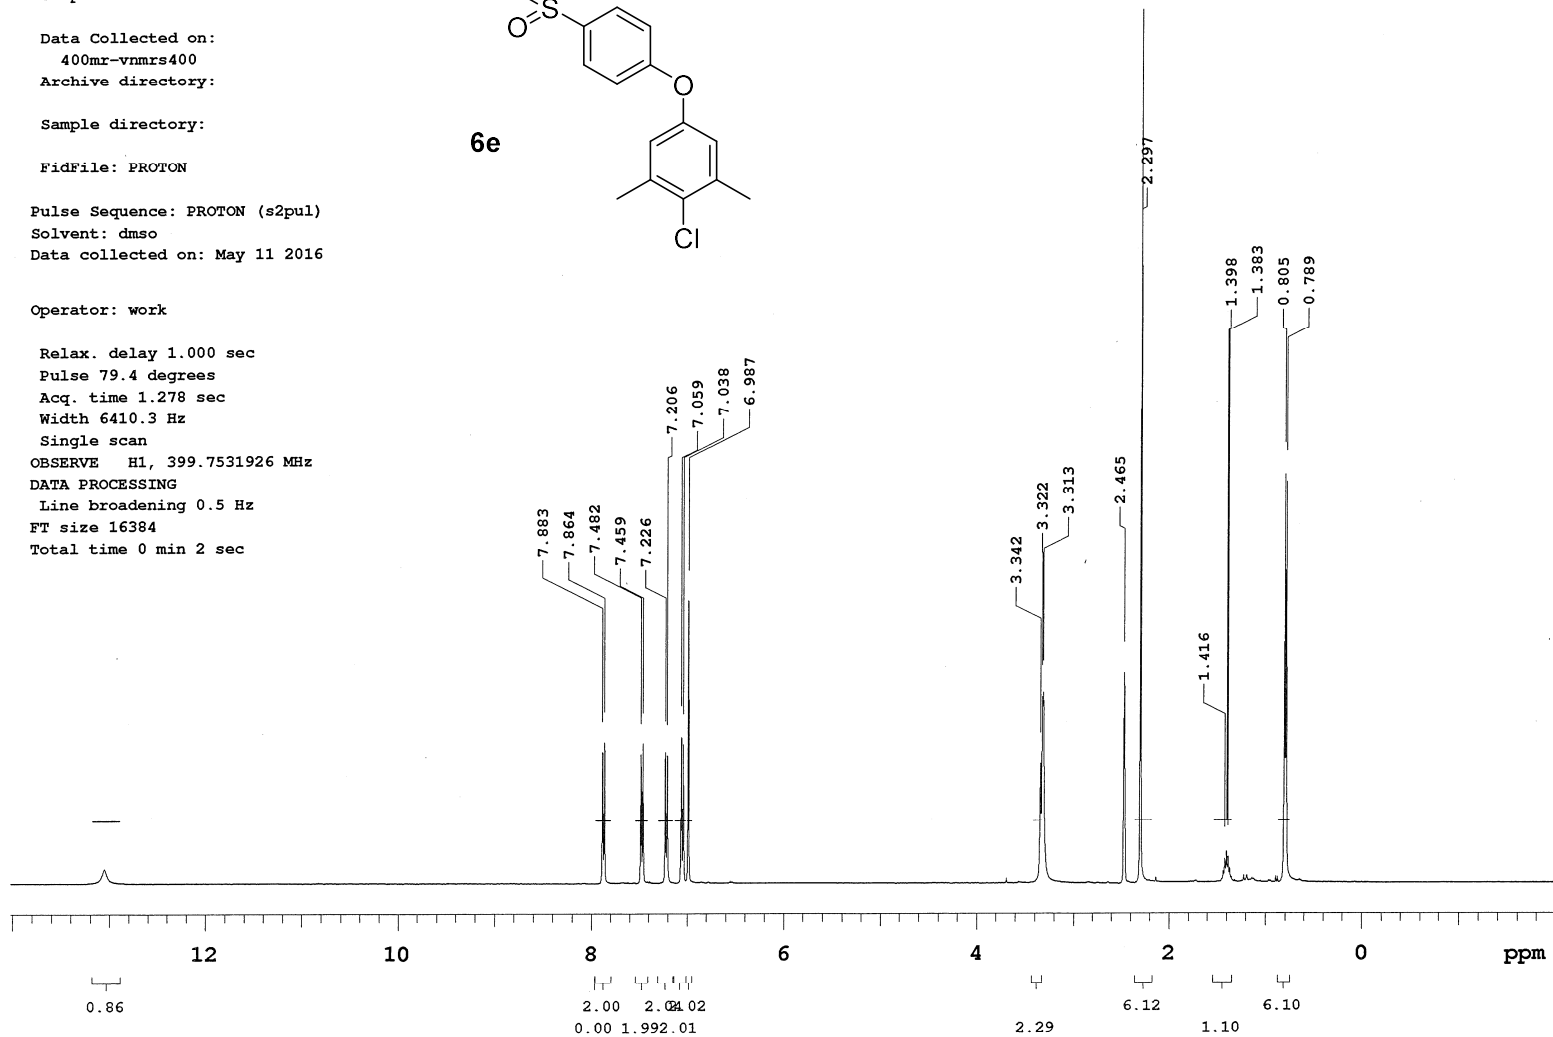

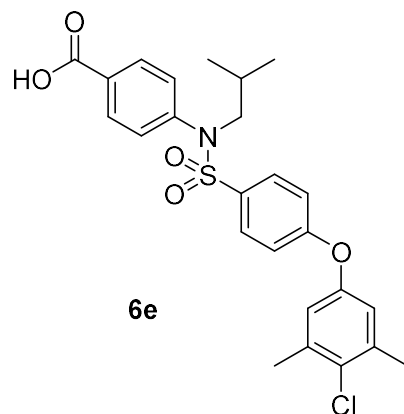

Sample Name:

Data Collected on:

400mr-vnmrs400

Archive directory:

Sample directory:

FidFile: CARBON

Pulse Sequence: CARBON (s2pul)

Solvent: dms0

Data collected on: May 11 2016

Operator: work

Relax. delay 1.000 sec

Pulse 58.1 degrees

Acq. time 0.813 sec

Width 24509.8 Hz

136 repetitions

OBSERVE C13, 100.5180202 MHz

DECOUPLE H1, 399.7551914 MHz

Power 39 dB

continuously on

WALTZ-16 modulated

DATA PROCESSING

Line broadening 3.0 Hz

FT size 32768

Total time 30 min

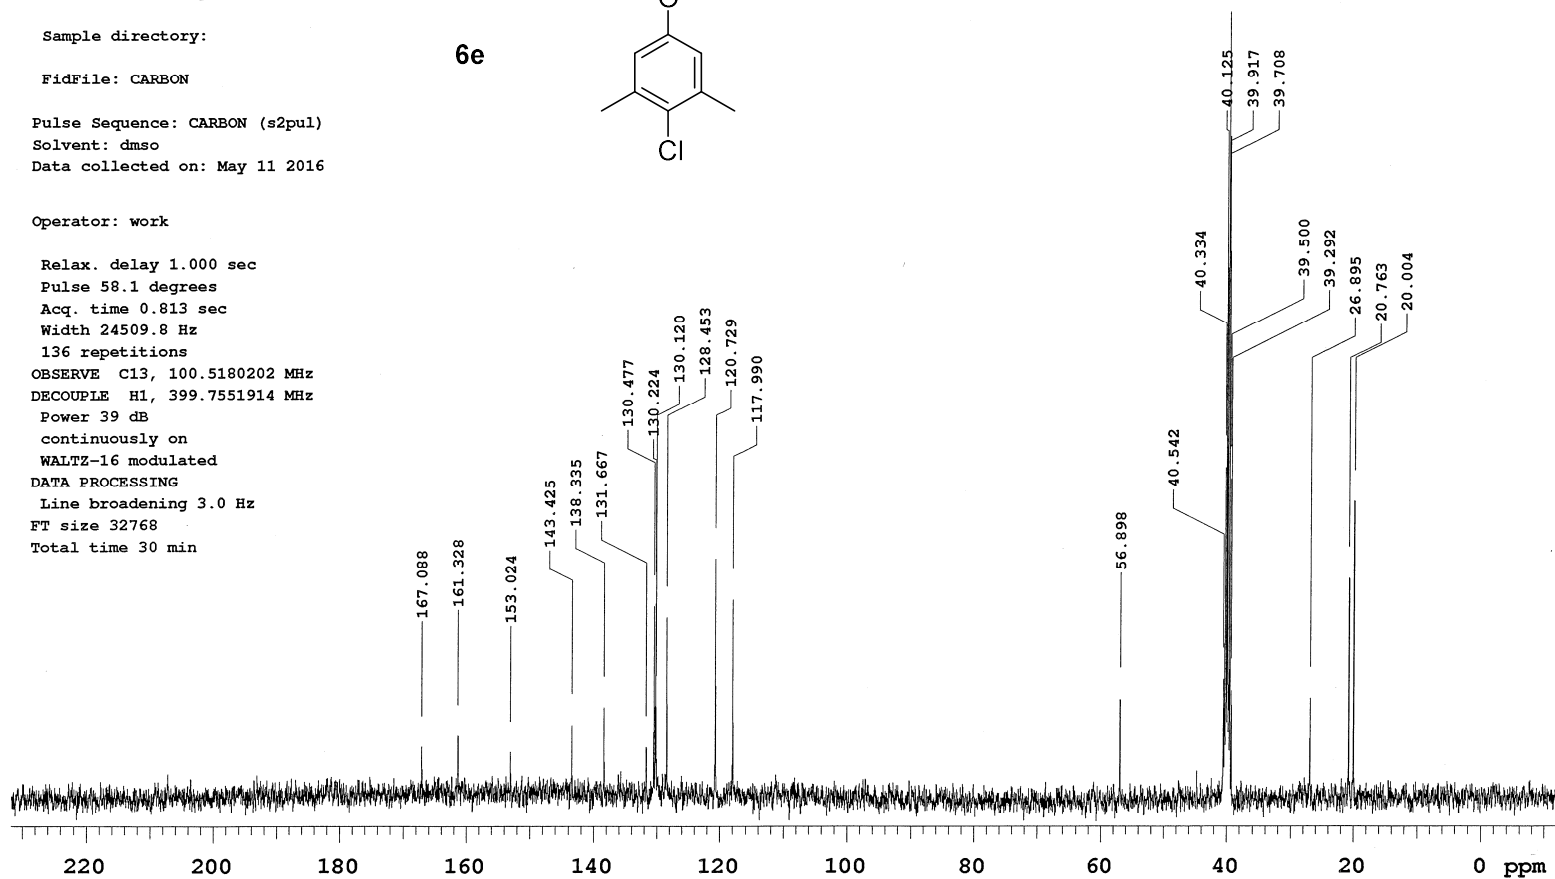

117-5

new experiment

Sample Name:

Data Collected on:

400mr-vmrs400

Archive directory:

Sample directory:

Fidfile: PROTON

Pulse Sequence: PROTON (s2pul)

Solvent: cdcl3

Data collected on: Nov 5 2015

Temp. 22.0 C / 295.1 K

Operator: work

Relax. delay 3.000 sec

Pulse 79.4 degrees

Acq. time 1.278 sec

Width 6410.3 Hz

16 repetitions

OBSERVE H1, 399.7512853 MHz

DATA PROCESSING

Line broadening 0.5 Hz

FT size 16384

Total time 1 min 8 sec

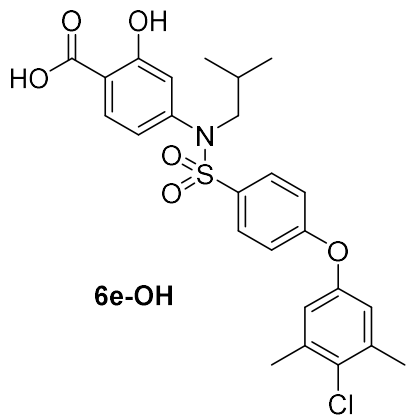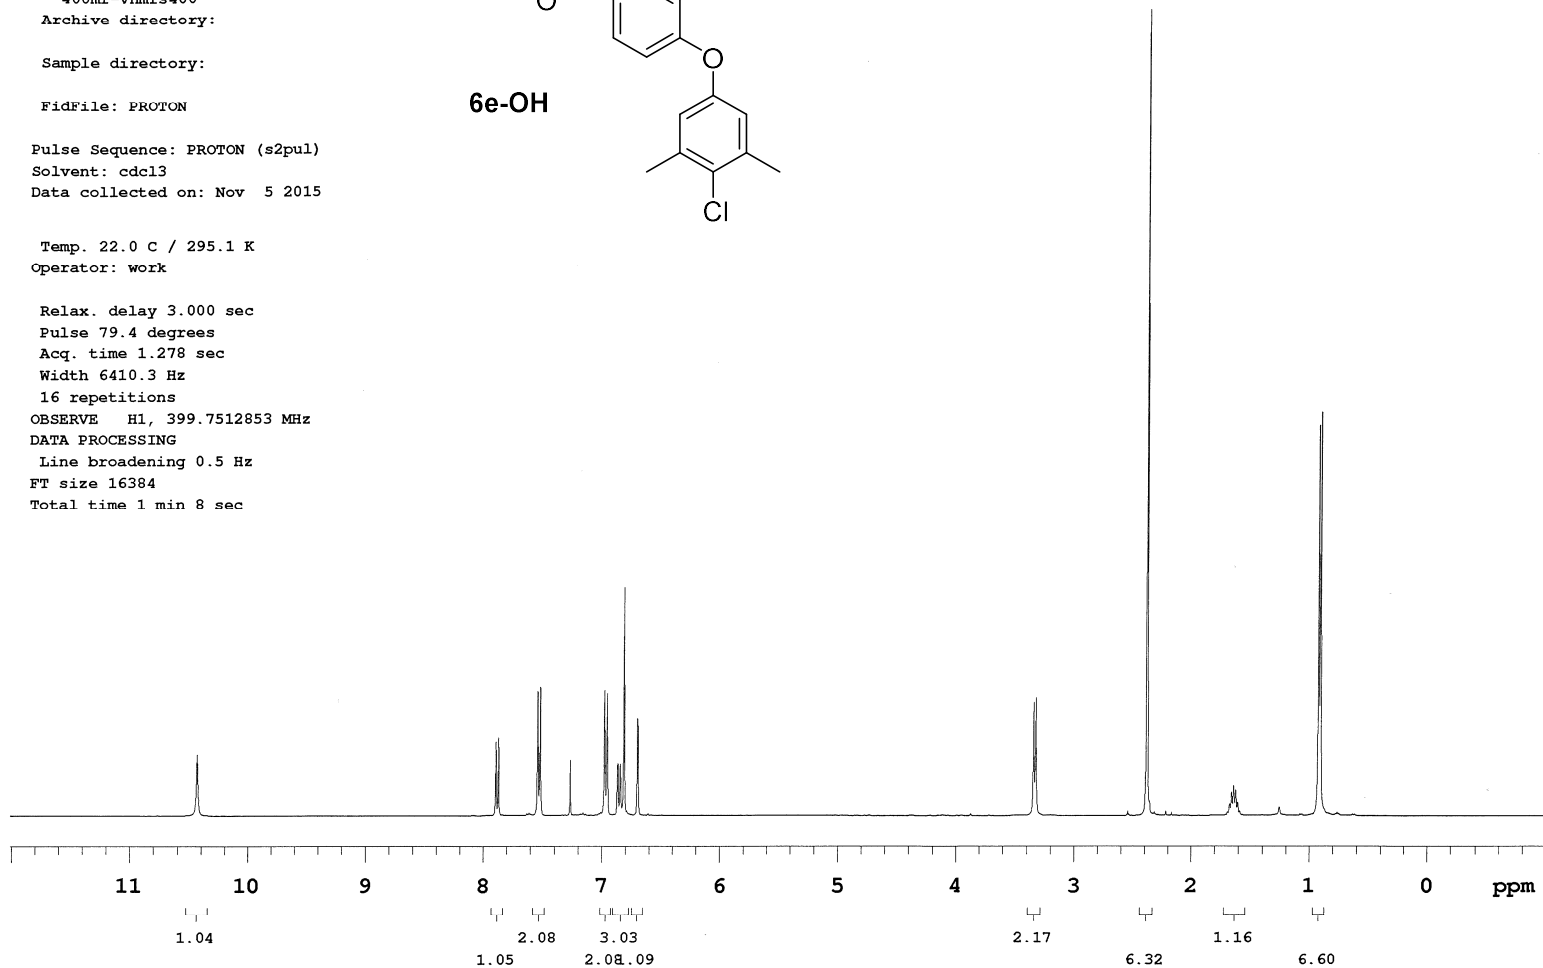

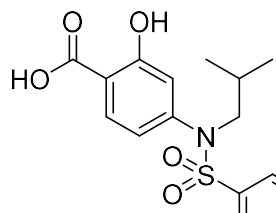

6e-OH

117-5

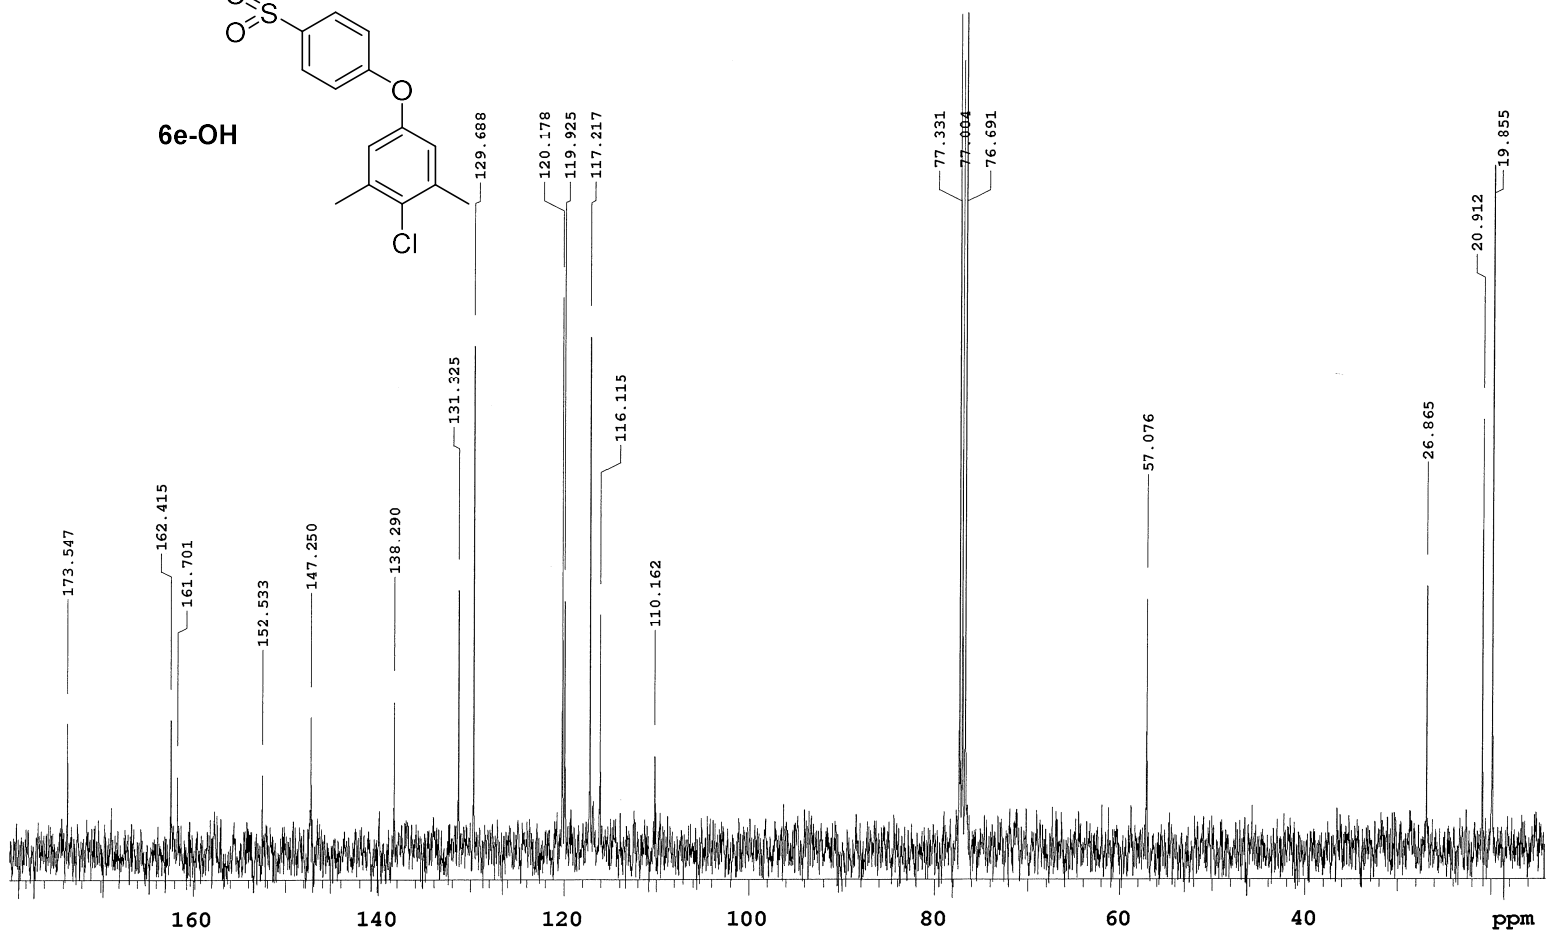

117-1

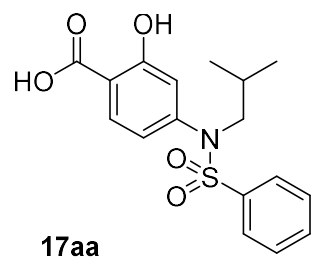

17aa

new experiment

Sample Name:

Data Collected on:

400mr-vmrs400

Archive directory:

Sample directory:

FidFile: PROTON

Pulse Sequence: PROTON (s2pul)

Solvent: cdc13

Data collected on: Nov 5 2015

Temp. 22.0 C / 295.1 K

Operator: work

Relax. delay 3.000 sec

Pulse 79.4 degrees

Acq. time 1.278 sec

Width 6410.3 Hz

16 repetitions

OBSERVE H1, 399.7512853 MHz

DATA PROCESSING

Line broadening 0.5 Hz

FT size 16384

Total time 1 min 8 sec

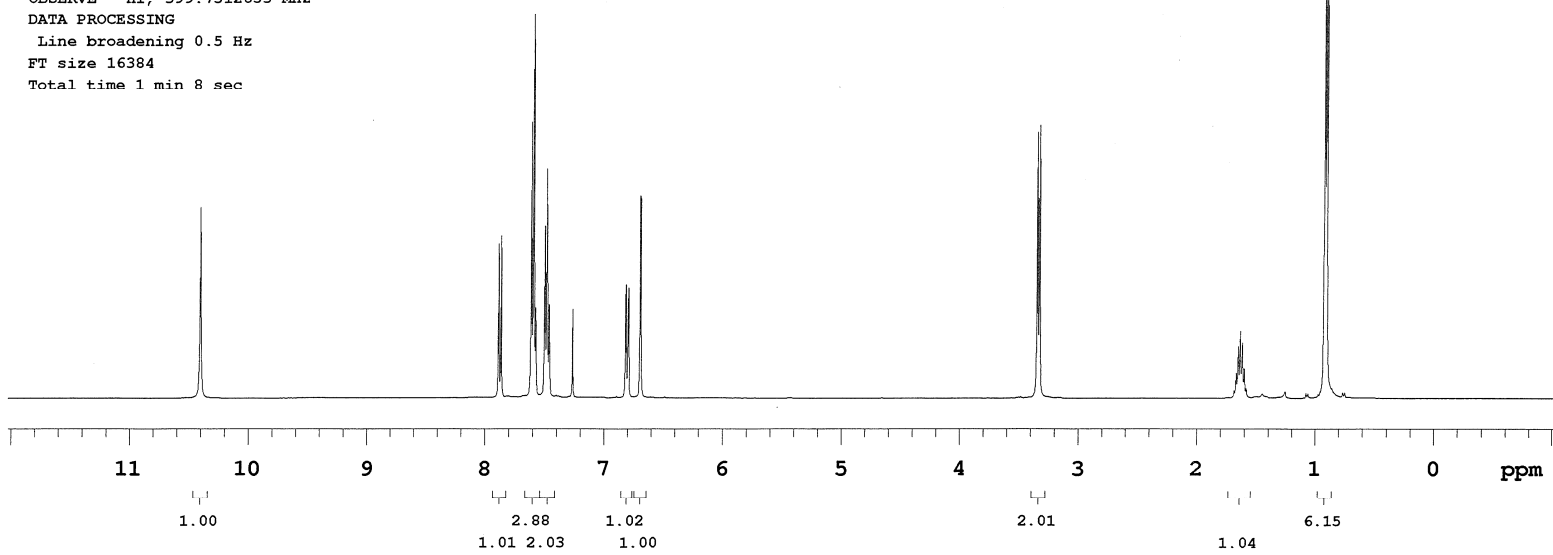

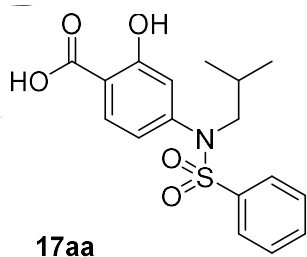

117-1

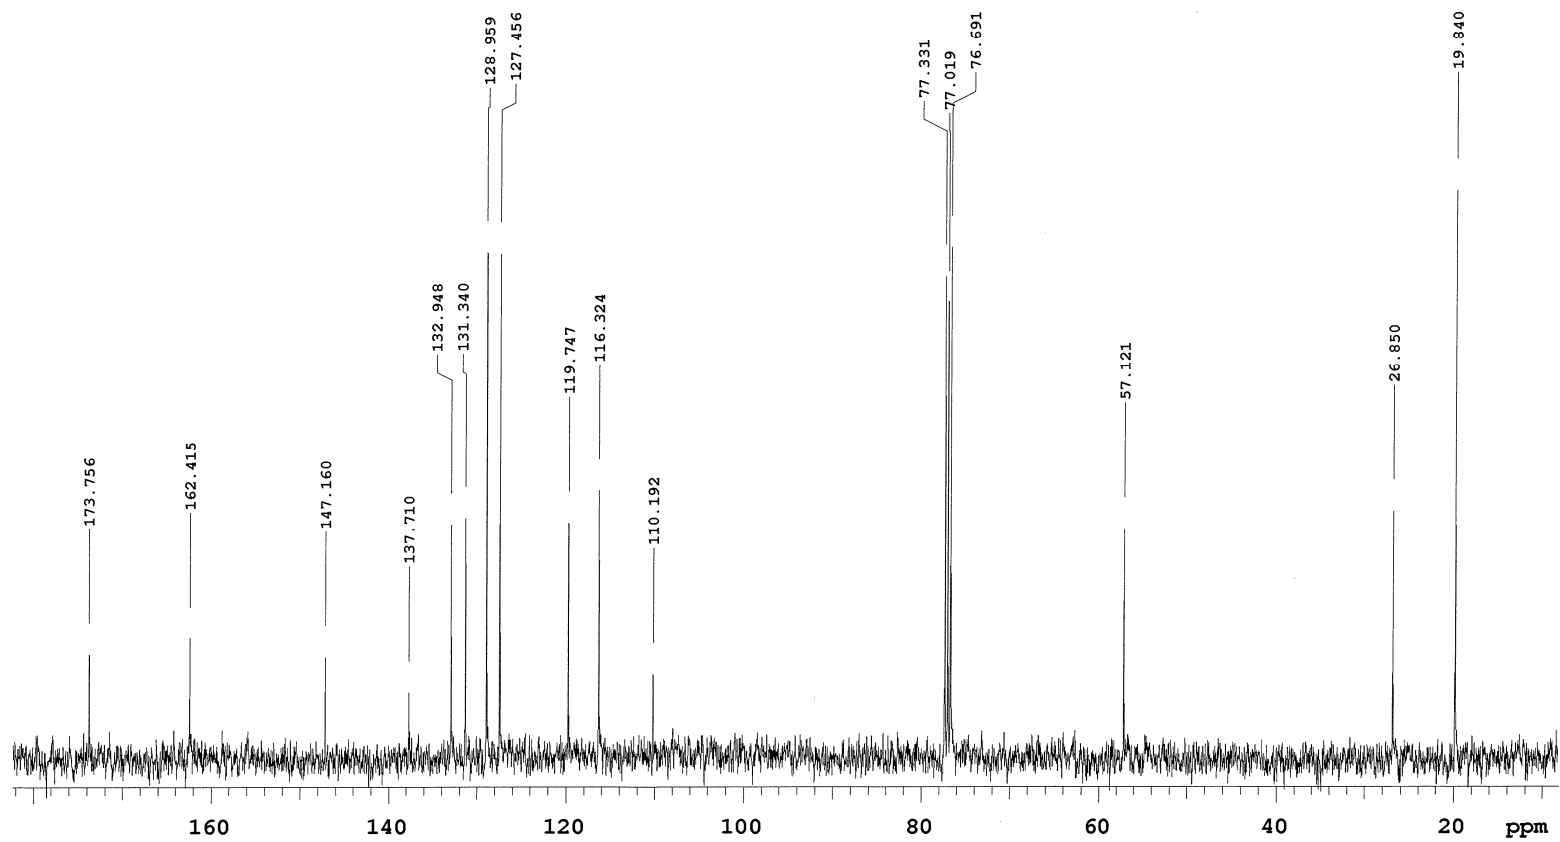

117-3

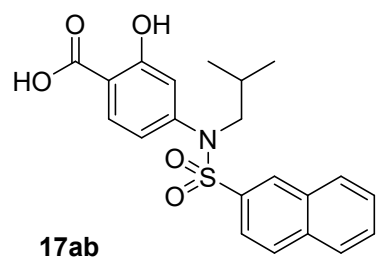

new experiment

Sample Name:

Data Collected on:

400mr-vnmrs400

Archive directory:

17ab

Sample directory:

FidFile: PROTON

Pulse Sequence: PROTON (s2pul)

Solvent: cdcl3

Data collected on: Nov 5 2015

Temp. 22.0 C / 295.1 K

Operator: work

Relax. delay 3.000 sec

Pulse 79.4 degrees

Acq. time 1.278 sec

Width 6410.3 Hz

16 repetitions

OBSERVE H1, 399.7512853 MHz

DATA PROCESSING

Line broadening 0.5 Hz

FT size 16384

Total time 1 min 8 sec

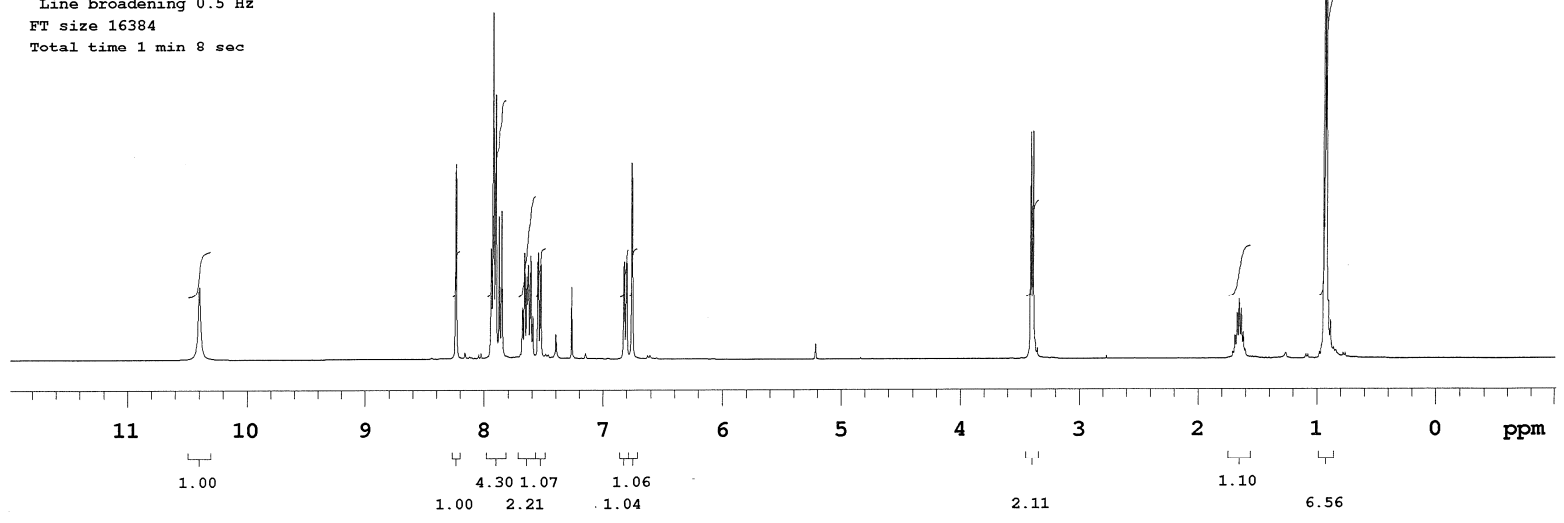

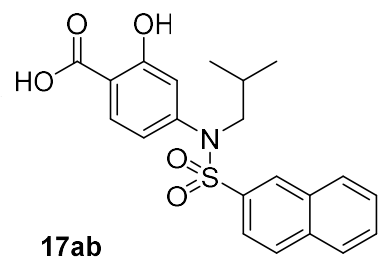

17ab

117-3

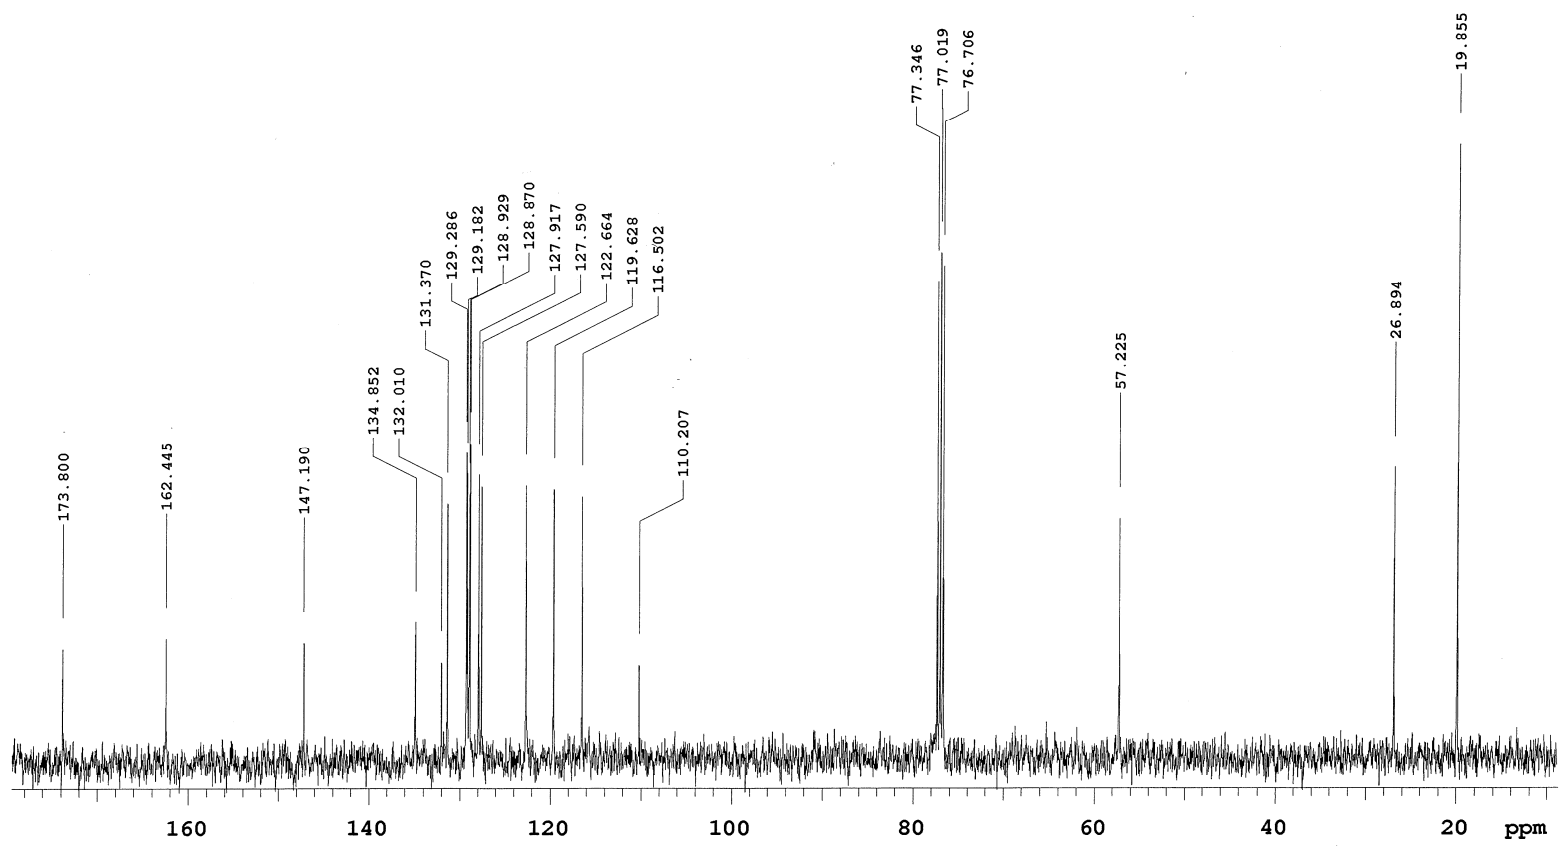



117-4

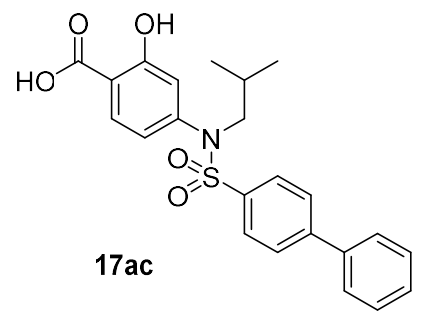

new experiment

Sample Name:

Data Collected on:

400mr-vnmrs400

Archive directory:

Sample directory:

FidFile: PROTON

Pulse Sequence: PROTON (s2pul)

Solvent: cdcl3

Data collected on: Nov 6 2015

Operator: work

Relax. delay 3.000 sec

Pulse 79.4 degrees

Acq. time 1.278 sec

Width 6410.3 Hz

16 repetitions

OBSERVE H1, 399.7512853 MHz

DATA PROCESSING

Line broadening 0.5 Hz

FT size 16384

Total time 1 min 8 sec

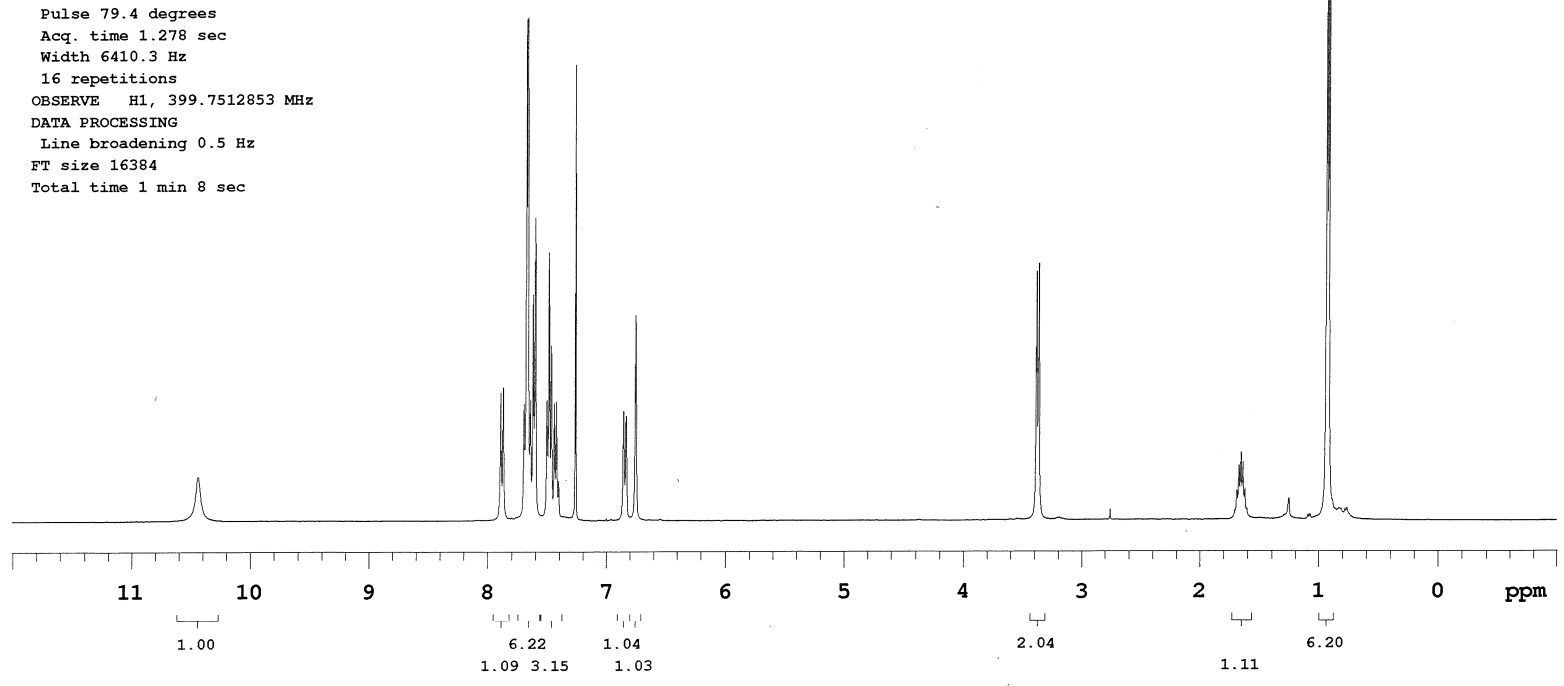

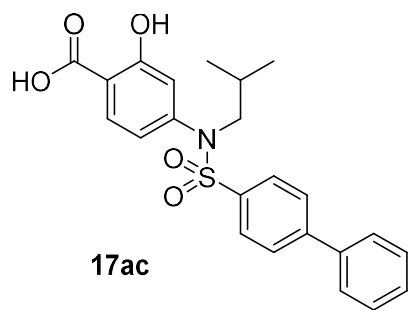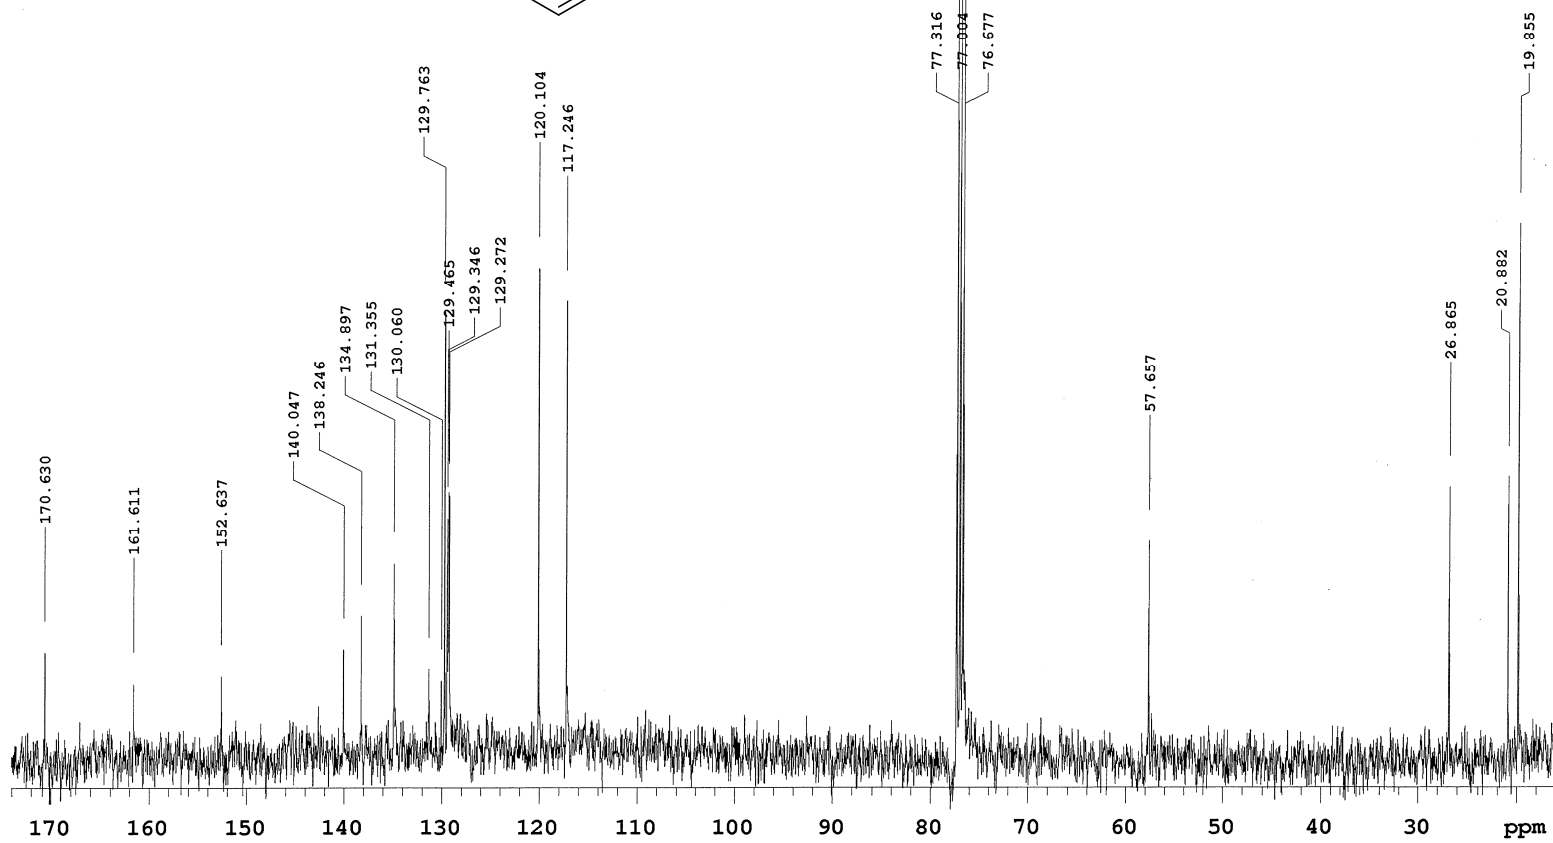

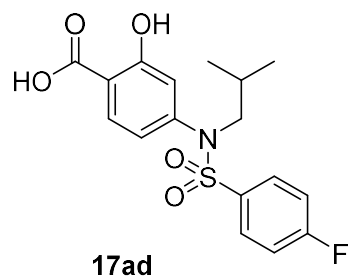

new experiment

Sample Name:

Data Collected on:

400mr-vmrs400

Archive directory:

Sample directory:

FidFile: PROTON

Pulse Sequence: PROTON (s2pul)

Solvent: dms0

Data collected on: Jul 17 2015

Temp. 22.0 C / 295.1 K

Operator: work

Relax. delay 1.000 sec

Pulse 45.0 degrees

Acq. time 2.556 sec

Width 6410.3 Hz

4 repetitions

OBSERVE H1, 399.7531926 MHz

DATA PROCESSING

FT size 32768

Total time 0 min 14 sec

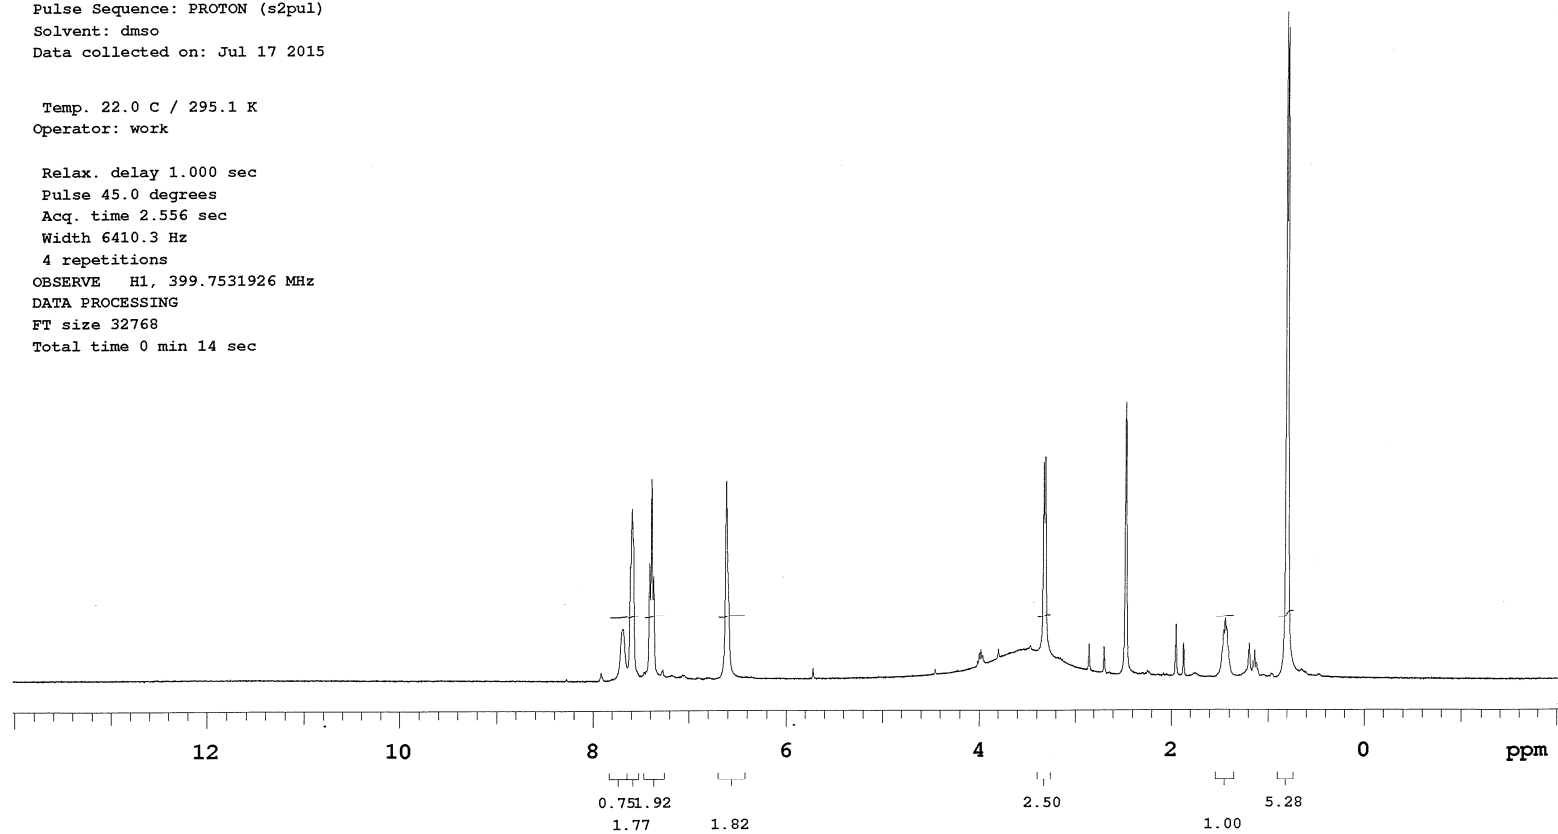

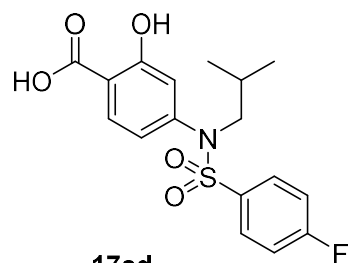

**17ad**

Sample Name:

Data Collected on:

400mr-vmrs400

Archive directory:

Sample directory:

FidFile: CARBON

Pulse Sequence: CARBON (s2pul)

Solvent: dmsc

Data collected on: Jul 17 2015

Temp. 22.0 C / 295.1 K

Operator: work

Relax. delay 1.000 sec

Pulse 45.0 degrees

Acq. time 1.285 sec

Width 25510.2 Hz

324 repetitions

OBSERVE C13, 100.5180202 MHz

DECOUPLE H1, 399.7551914 MHz

Power 39 dB

continuously on

WALTZ-16 modulated

DATA PROCESSING

Line broadening 0.5 Hz

FT size 65536

Total time 38 min

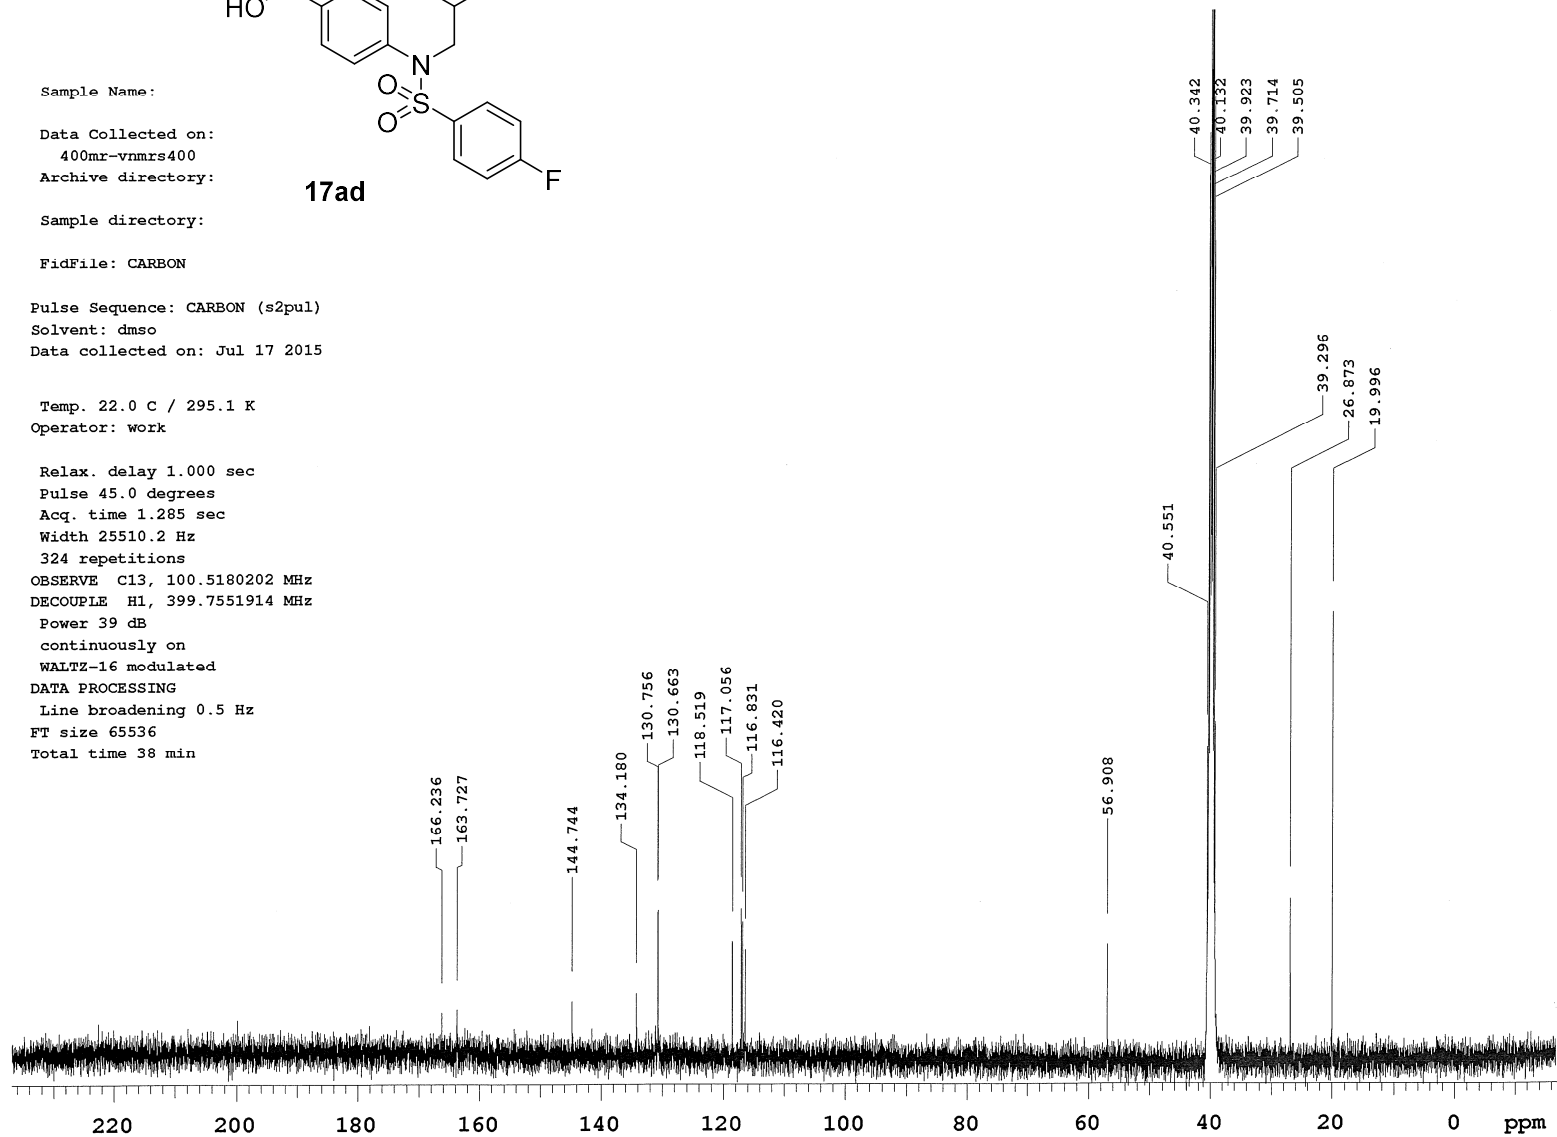

new experiment

Sample Name:

Data Collected on:

400mr-vmrs400

Archive directory:

Sample directory:

FidFile: PROTON

Pulse Sequence: PROTON (s2pul)

Solvent: dms0

Data collected on: Jul 2 2015

Temp. 22.0 C / 295.1 K

Operator: work

Relax. delay 1.000 sec

Pulse 45.0 degrees

Acq. time 2.556 sec

Width 6410.3 Hz

4 repetitions

OBSERVE H1, 399.7531926 MHz

DATA PROCESSING

FT size 32768

Total time 0 min 14 sec

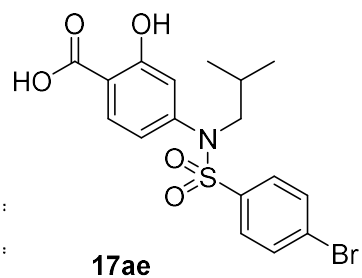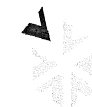

VARIAN

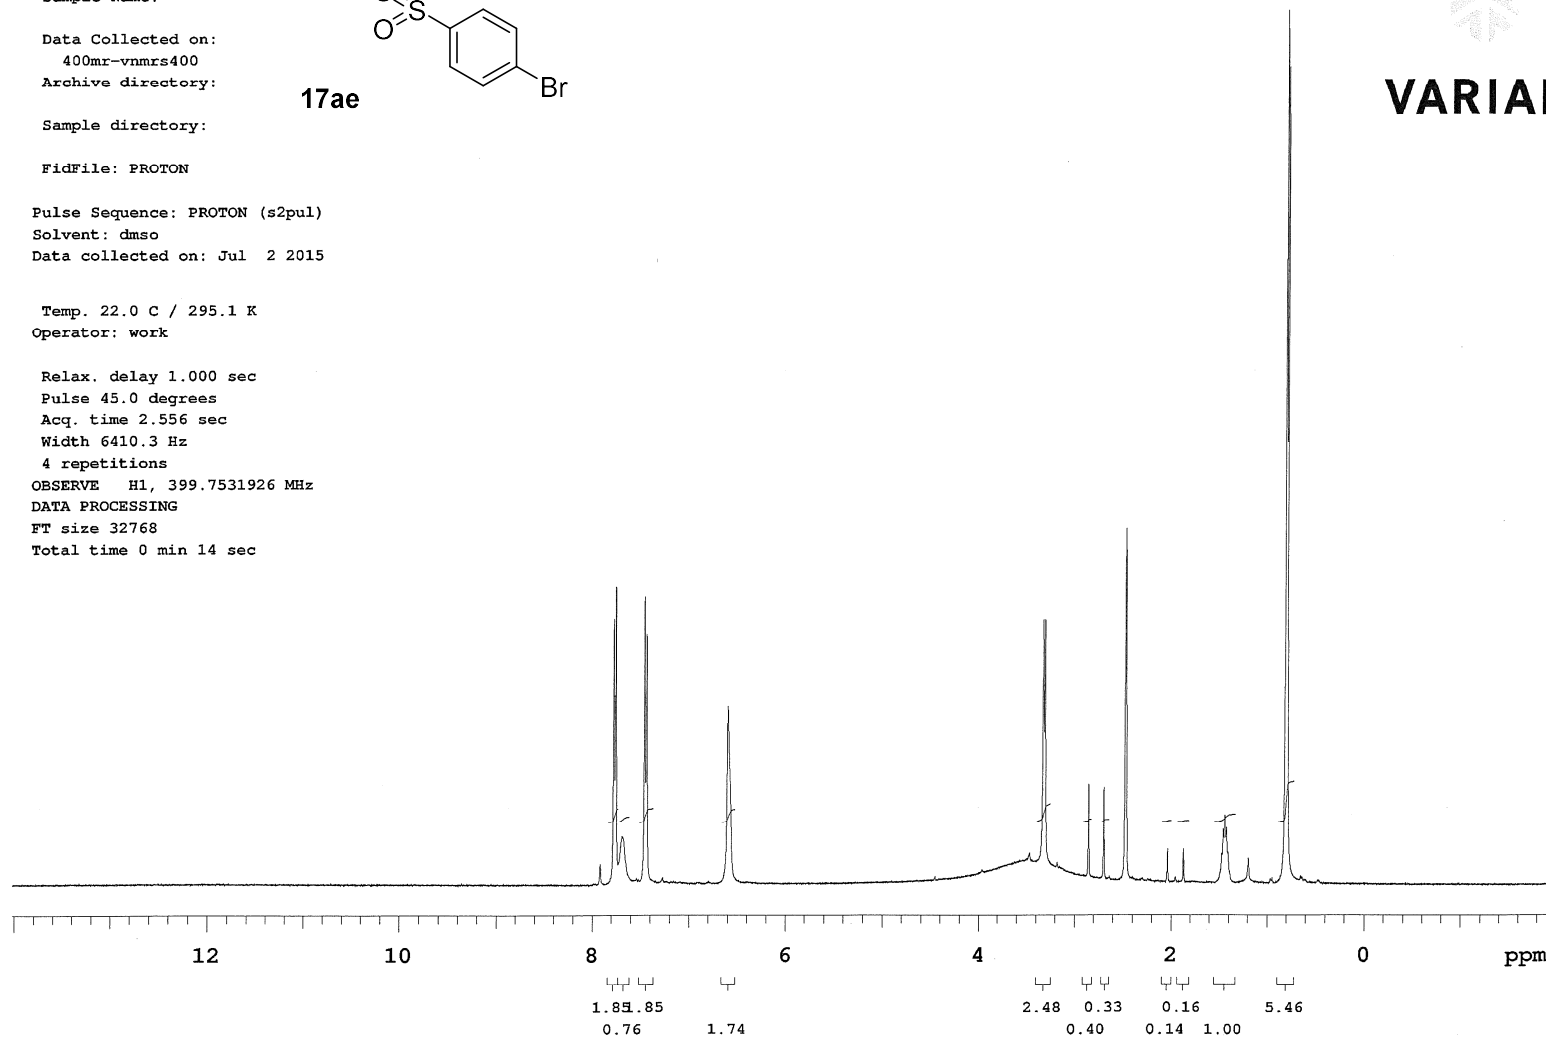

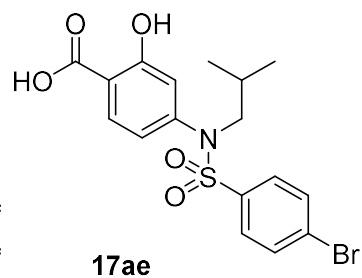

Sample Name:

Data Collected on:  
400mr-vnmrs400  
Archive directory:

Sample directory:

FidFile: CARBON

Pulse Sequence: CARBON (s2pul)  
Solvent: dmsd  
Data collected on: Jul 2 2015

Temp. 22.0 C / 295.1 K  
Operator: work

Relax. delay 1.000 sec  
Pulse 58.1 degrees  
Acq. time 0.813 sec  
Width 24509.8 Hz  
256 repetitions

OBSERVE C13, 100.5180202 MHz  
DECOUPLE H1, 399.7551914 MHz  
Power 39 dB

continuously on  
WALTZ-16 modulated

DATA PROCESSING  
Line broadening 3.0 Hz  
FT size 32768  
Total time 30 min

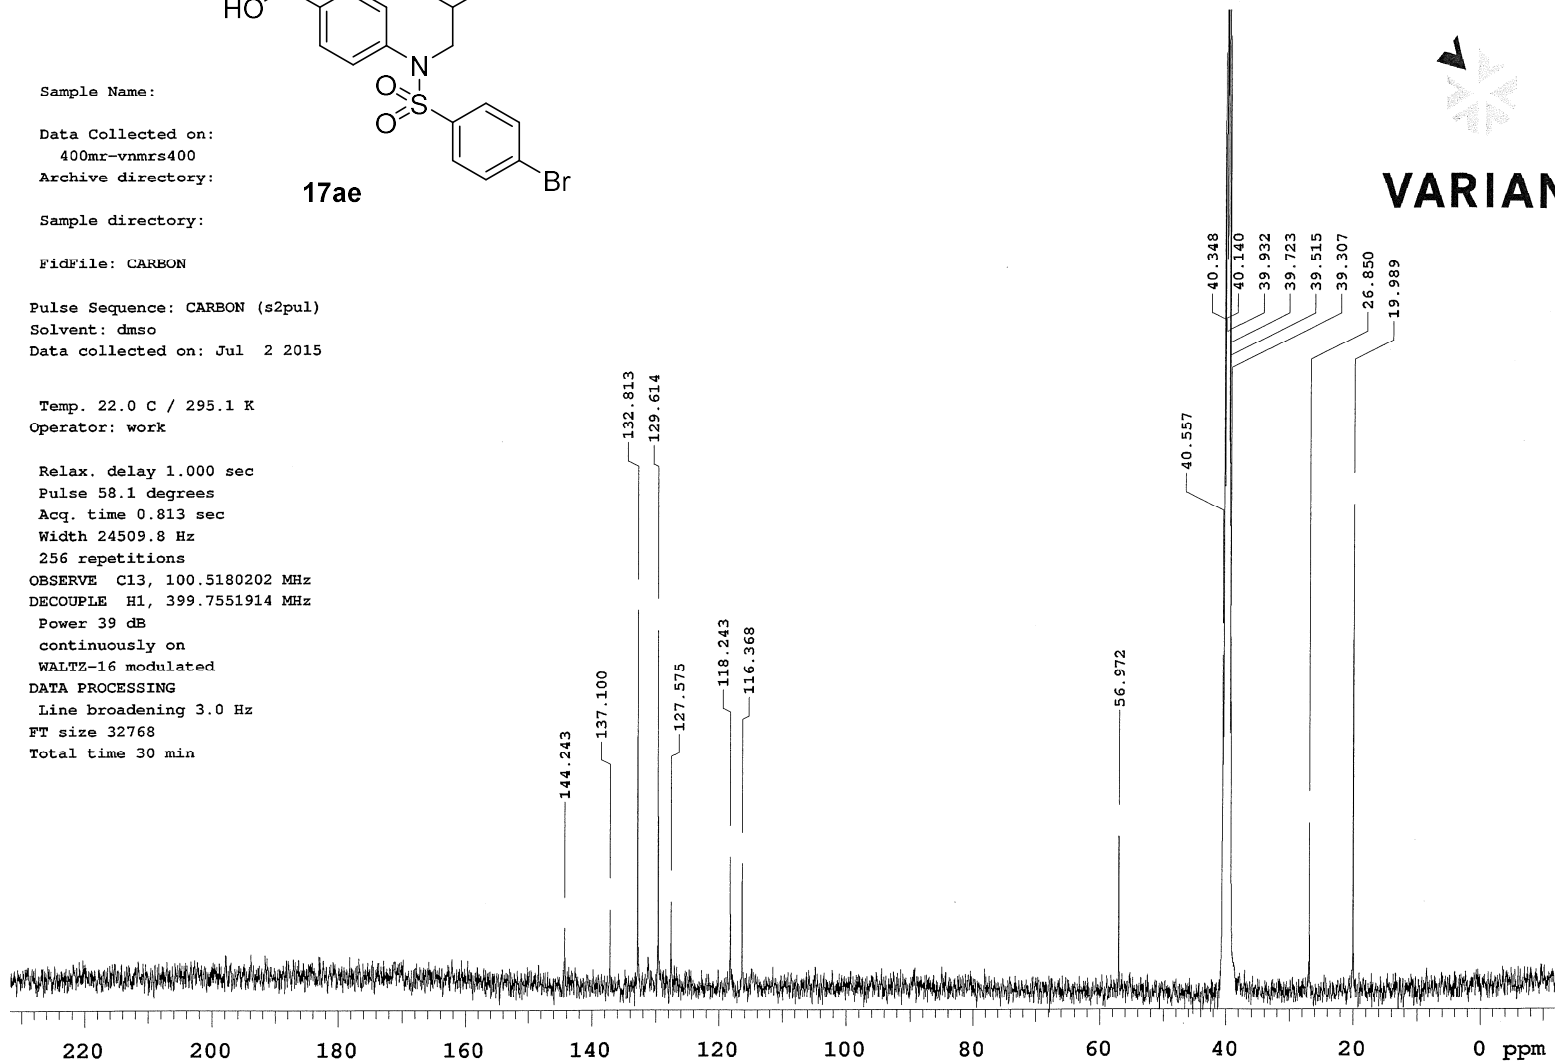

  
**VARIAN**

117-2

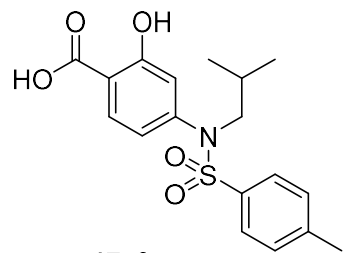

17af

new experiment

Sample Name:

Data Collected on:

400mr-vnmrs400

Archive directory:

Sample directory:

FidFile: PROTON

Pulse Sequence: PROTON (s2pul)

Solvent: cdcl3

Data collected on: Nov 5 2015

Temp. 22.0 C / 295.1 K

Operator: work

Relax. delay 3.000 sec

Pulse 79.4 degrees

Acq. time 1.278 sec

Width 6410.3 Hz

16 repetitions

OBSERVE H1, 399.7512853 MHz

DATA PROCESSING

Line broadening 0.5 Hz

FT size 16384

Total time 1 min 8 sec

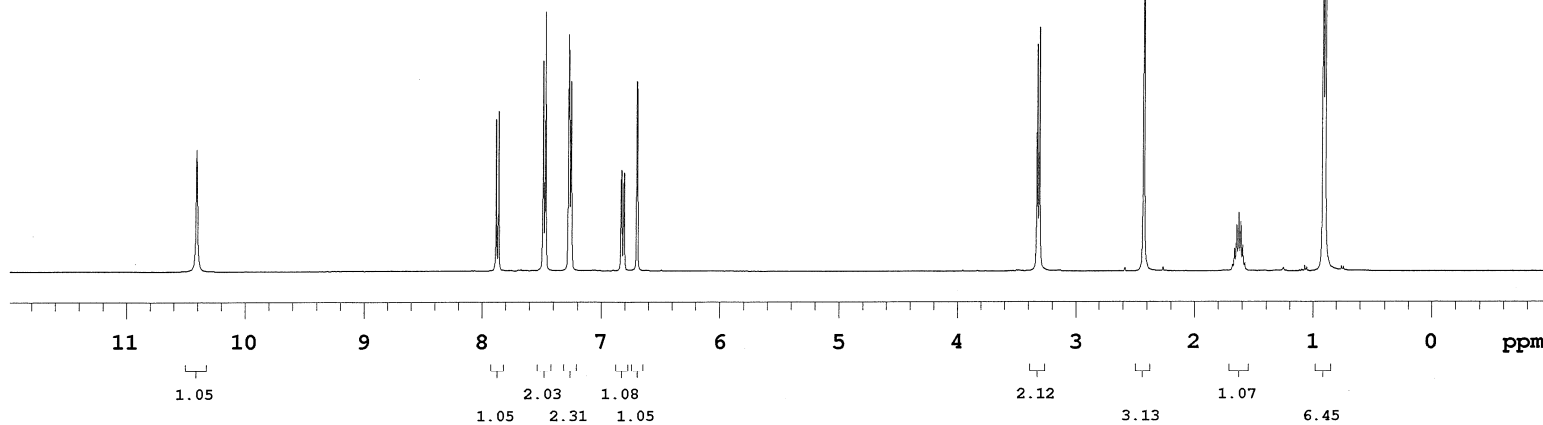

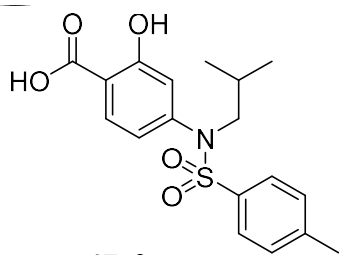

17af

117-2

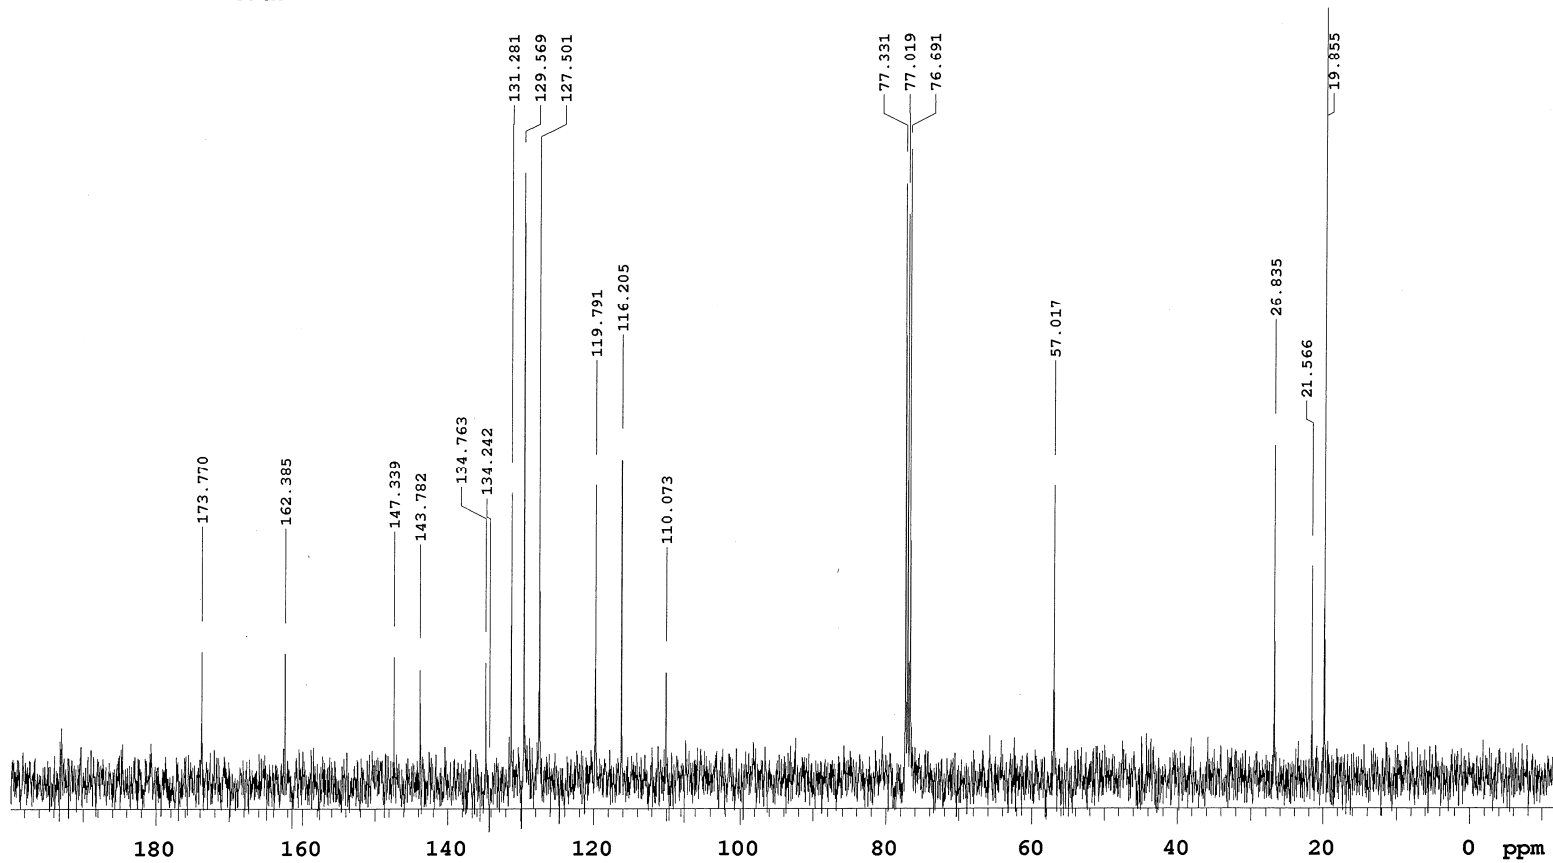



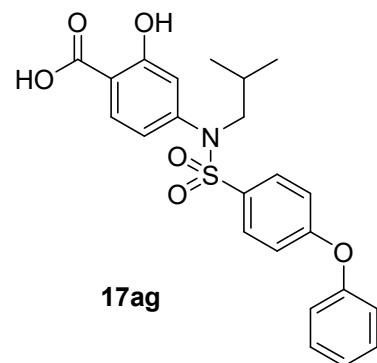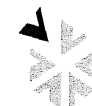

VARIAN

Sample Name:

Data Collected on:

400mr-vnmrs400

Archive directory:

Sample directory:

FidFile: LC-4-099-DMSO

Pulse Sequence: PROTON (s2pul)

Solvent: dmsd

Data collected on: Nov 24 2014

Temp. 26.0 C / 299.1 K

Operator: work

Relax. delay 2.000 sec

Pulse 79.4 degrees

Acq. time 1.278 sec

Width 6410.3 Hz

4 repetitions

OBSERVE H1, 399.7531926 MHz

DATA PROCESSING

FT size 16384

Total time 0 min 13 sec

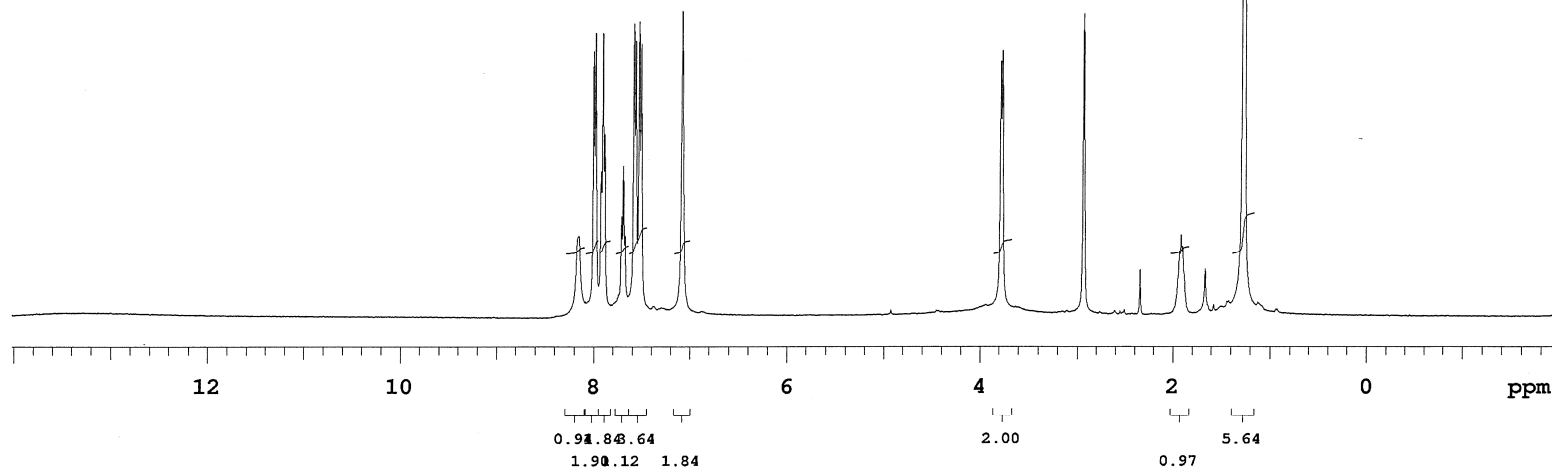

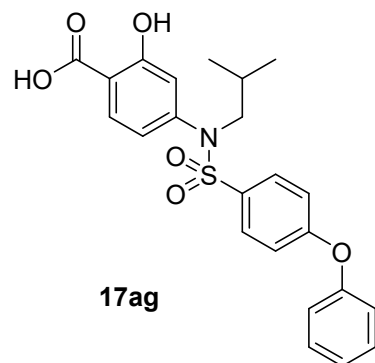

Sample Name:

Data Collected on:  
400mr-vnmrs400  
Archive directory:

Sample directory:

FidFile: CARBON

Pulse Sequence: CARBON (s2pul)  
Solvent: dmsd  
Data collected on: Nov 24 2014

Temp. 26.0 C / 299.1 K  
Operator: work

Relax. delay 1.000 sec  
Pulse 58.1 degrees  
Acq. time 0.813 sec  
Width 24509.8 Hz  
520 repetitions  
OBSERVE C13, 100.5180202 MHz  
DECOUPLE H1, 399.7551914 MHz  
Power 39 dB  
continuously on  
WALTZ-16 modulated  
DATA PROCESSING  
Line broadening 3.0 Hz  
FT size 32768  
Total time 30 min

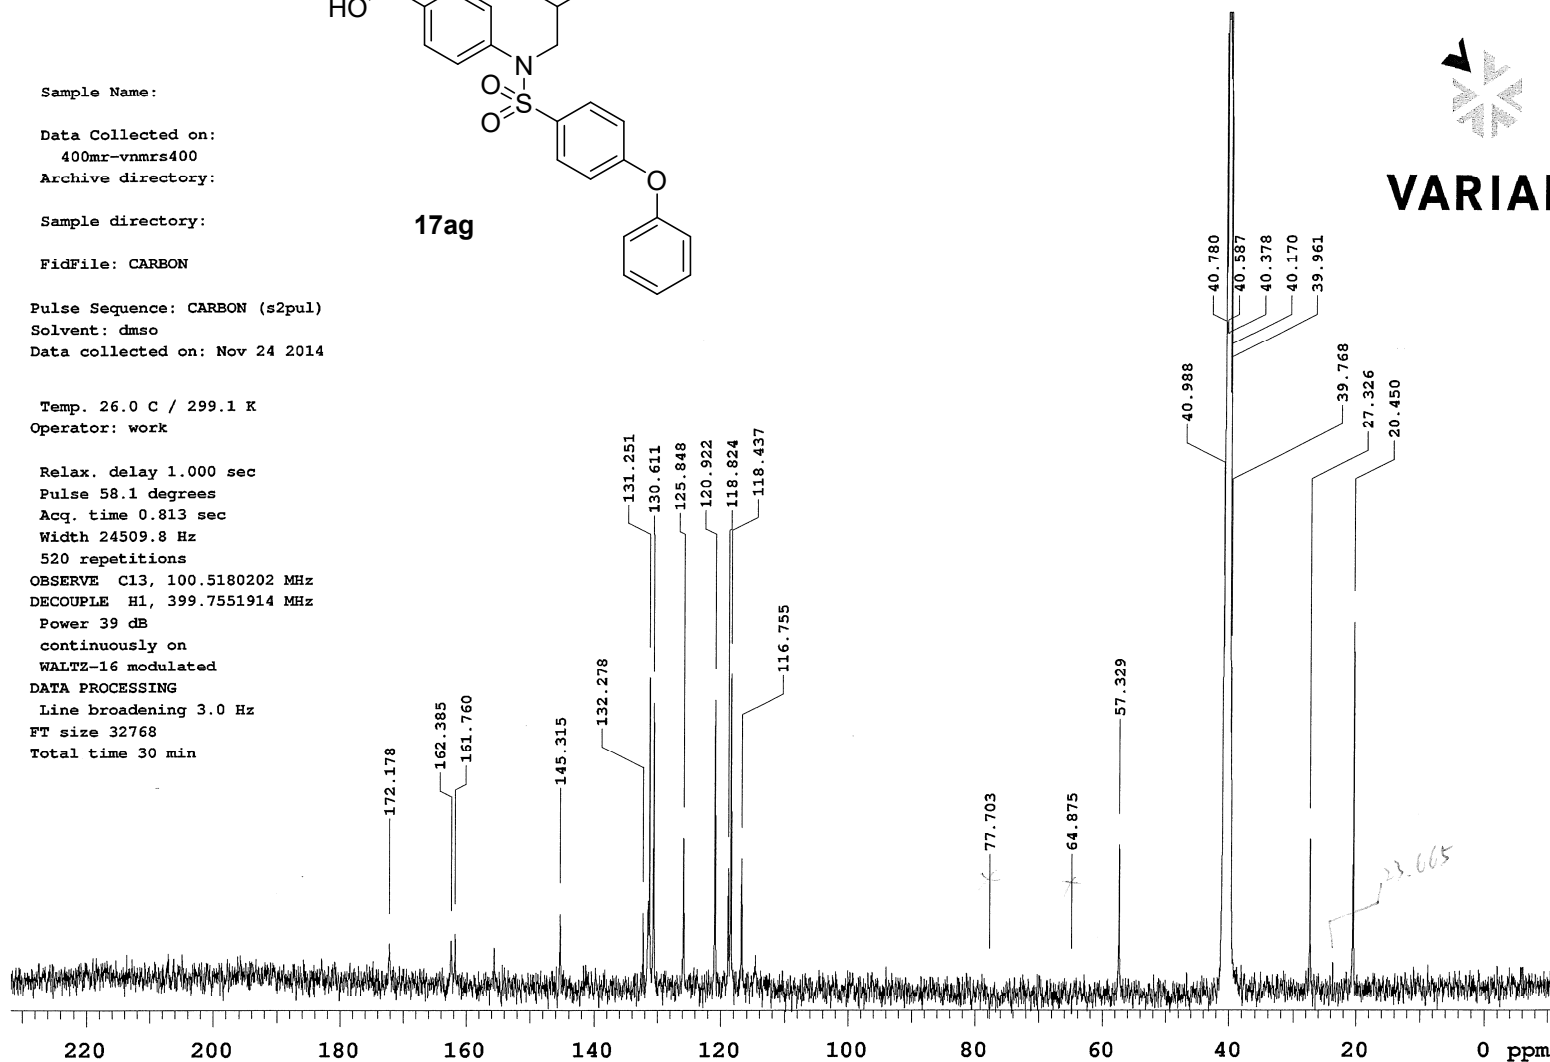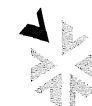

VARIAN

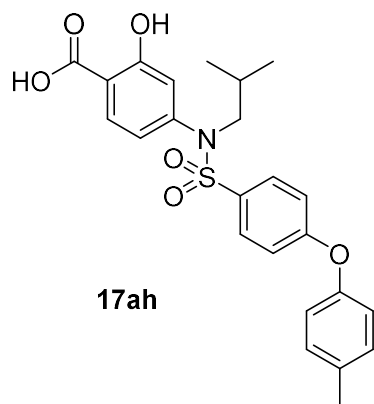

Sample Name:

Data Collected on:  
400mr-vnmrs400  
Archive directory:

Sample directory:

FidFile: PROTON

Pulse Sequence: PROTON (s2pul)  
Solvent: dms0  
Data collected on: Dec 12 2014

Temp. 26.0 C / 299.1 K  
Operator: work

Relax. delay 1.000 sec  
Pulse 79.4 degrees  
Acq. time 1.278 sec  
Width 6410.3 Hz  
4 repetitions  
OBSERVE H1, 399.7531926 MHz  
DATA PROCESSING  
Line broadening 0.5 Hz  
FT size 16384  
Total time 0 min 9 sec

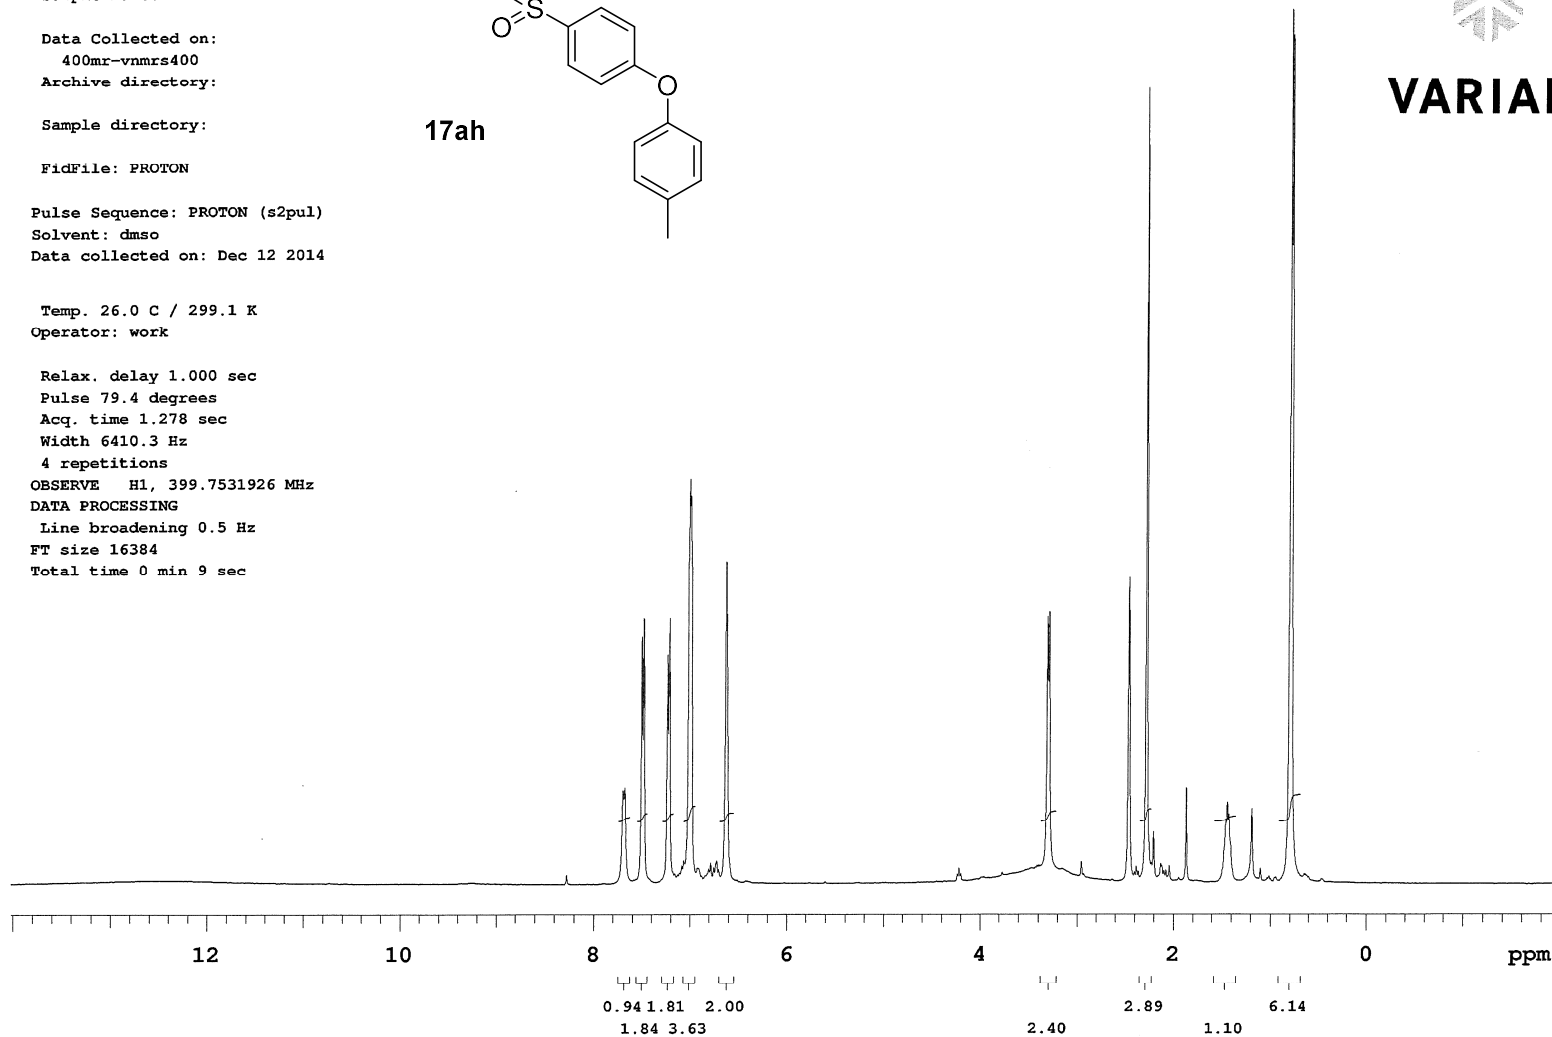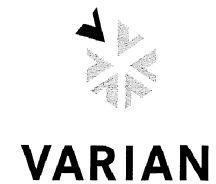

Sample Name:

Data Collected on:  
400mr-vnmrs400  
Archive directory:

Sample directory:

FidFile: CARBON

Pulse Sequence: CARBON (s2pul)  
Solvent: dmsd  
Data collected on: Dec 12 2014

Temp. 26.0 C / 299.1 K  
Operator: work

Relax. delay 1.000 sec  
Pulse 58.1 degrees  
Acq. time 0.813 sec  
Width 21186.4 Hz  
388 repetitions  
OBSERVE C13, 100.5180202 MHz  
DECOUPLE H1, 399.7551914 MHz  
Power 39 dB  
continuously on  
WALTZ-16 modulated  
DATA PROCESSING  
Line broadening 3.0 Hz  
FT size 32768  
Total time 30 min

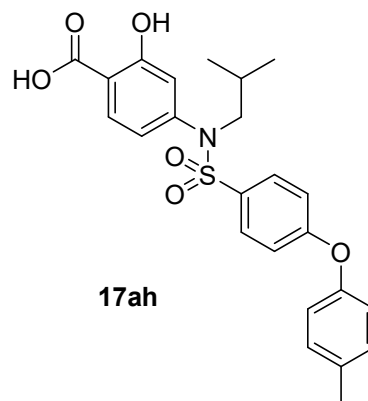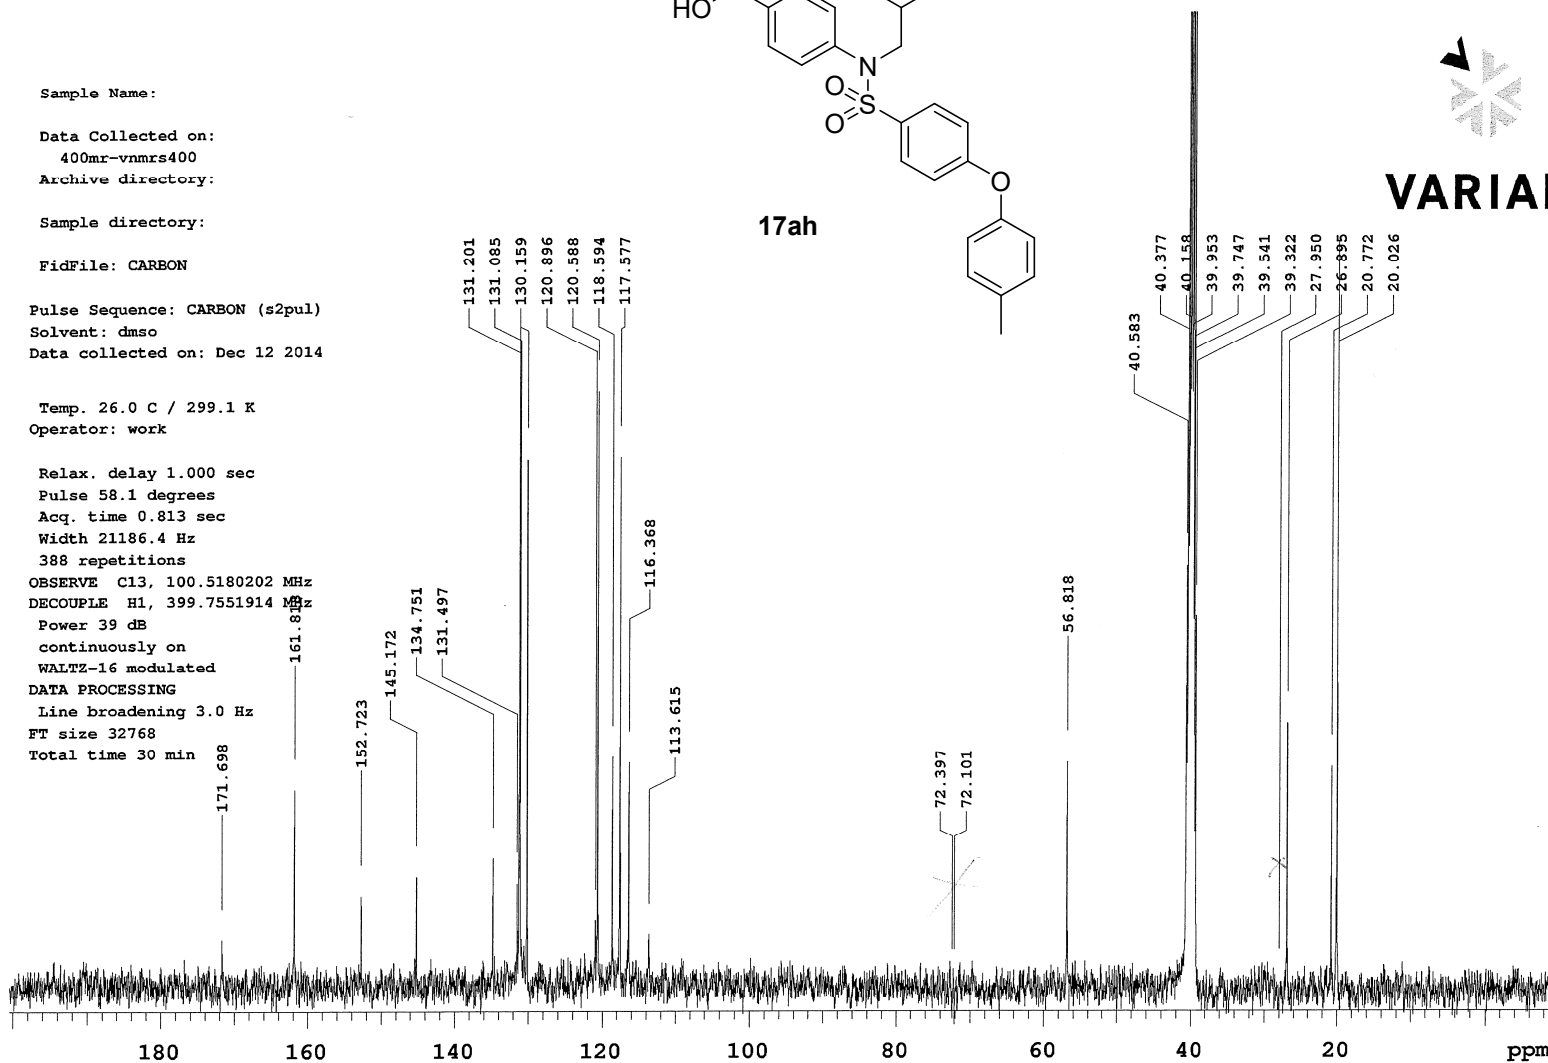

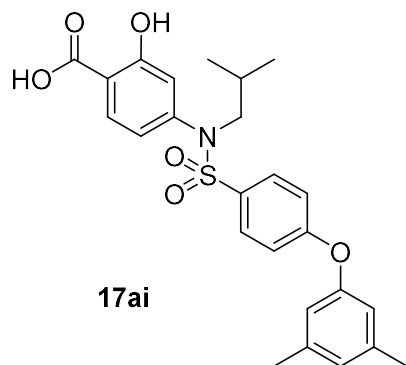

Sample Name:

Data Collected on:

400mr-vnmrs400

Archive directory:

Sample directory:

FidFile: PROTON

Pulse Sequence: PROTON (s2pul)

Solvent: dmsd

Data collected on: Nov 24 2014

Temp. 26.0 C / 299.1 K

Operator: work

Relax. delay 2.000 sec

Pulse 79.4 degrees

Acq. time 1.278 sec

Width 6410.3 Hz

4 repetitions

OBSERVE H1, 399.7531926 MHz

DATA PROCESSING

FT size 16384

Total time 0 min 13 sec

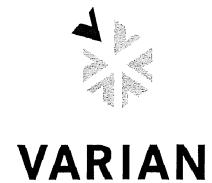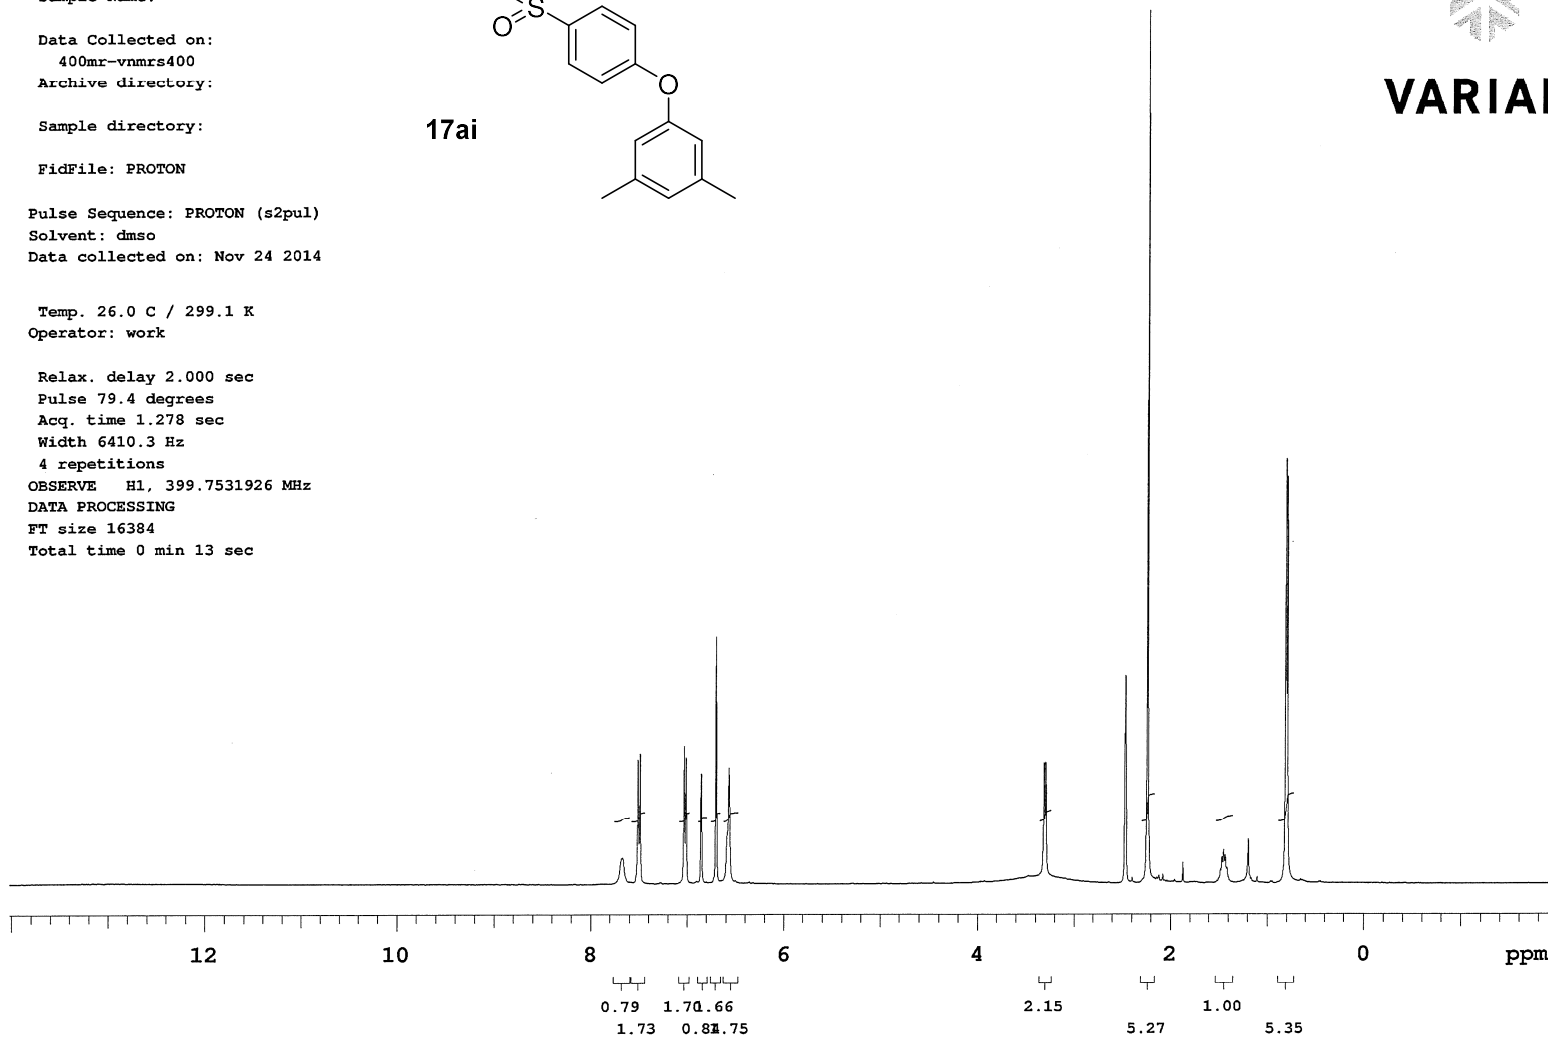

Sample Name:

Data Collected on:

400mr-vmrs400

Archive directory:

Sample directory:

FidFile: CARBON

Pulse Sequence: CARBON (s2pul)

Solvent: dms0

Data collected on: Nov 24 2014

Temp. 26.0 C / 299.1 K

Operator: work

Relax. delay 1.000 sec

Pulse 58.1 degrees

Acq. time 0.813 sec

Width 24509.8 Hz

436 repetitions

OBSERVE C13, 100.518020 MHz

DECOUPLE H1, 399.7551914 MHz

Power 39 dB

continuously on

WALTZ-16 modulated

DATA PROCESSING

Line broadening 3.0 Hz

FT size 32768

Total time 30 min

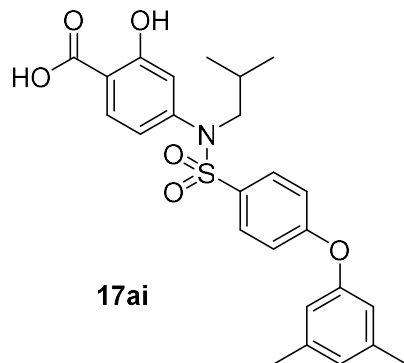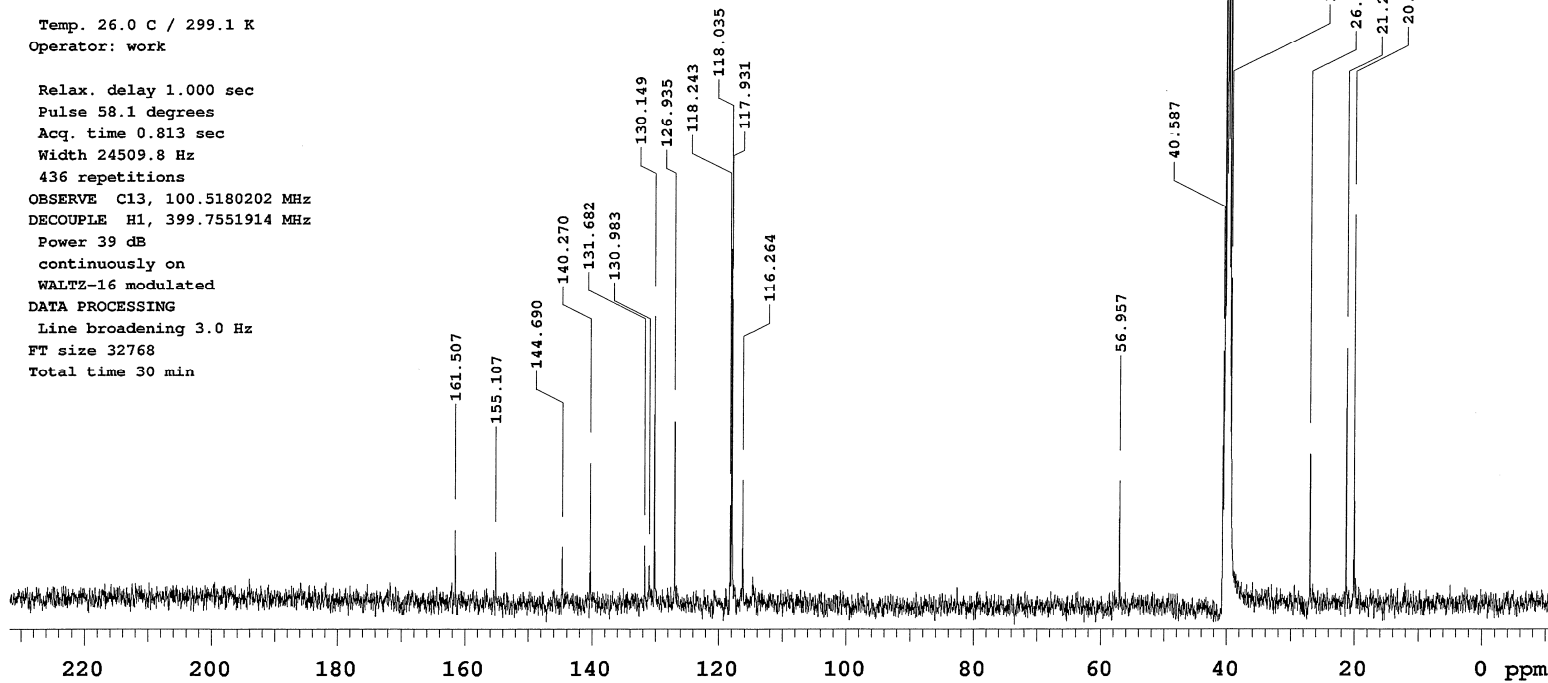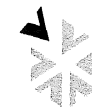

VARIAN

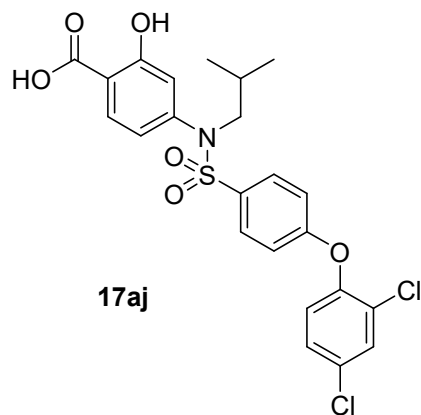

Sample Name:

Data Collected on:

400mr-vmrs400

Archive directory:

Sample directory:

Fidfile: PROTON

Pulse Sequence: PROTON (s2pul)

Solvent: dms0

Data collected on: Dec 9 2014

Temp. 26.0 C / 299.1 K

Operator: work

Relax. delay 3.000 sec

Pulse 79.4 degrees

Acq. time 1.278 sec

Width 6410.3 Hz

4 repetitions

OBSERVE H1, 399.7531926 MHz

DATA PROCESSING

Line broadening 0.5 Hz

FT size 16384

Total time 0 min 17 sec

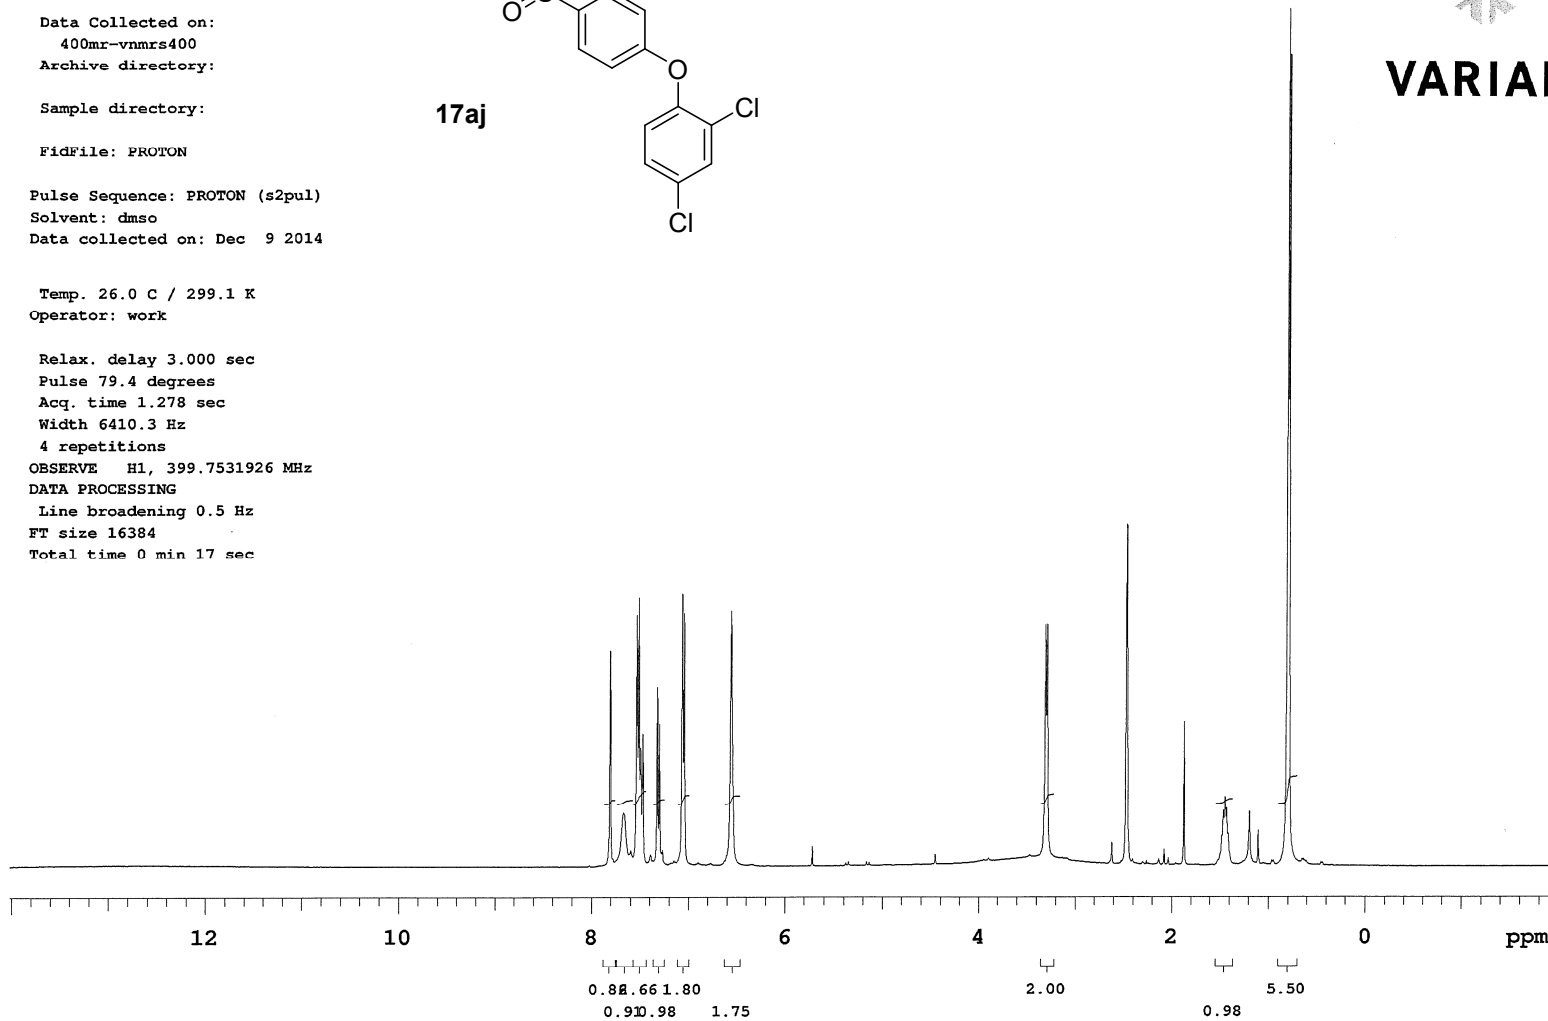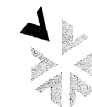

VARIAN

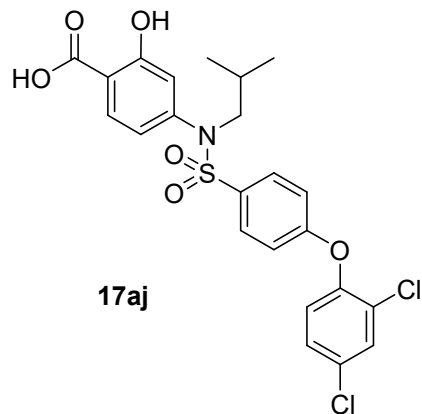

Sample Name:

Data Collected on:  
400mr-vmrs400  
Archive directory:

Sample directory:

FidFile: CARBON

Pulse Sequence: CARBON (s2pul)  
Solvent: dmsd  
Data collected on: Dec 9 2014

Temp. 26.0 C / 299.1 K  
Operator: work

Relax. delay 1.000 sec  
Pulse 58.1 degrees  
Acq. time 0.813 sec  
Width 24509.8 Hz  
424 repetitions  
OBSERVE C13, 100.5180202 MHz  
DECOUPLE H1, 399.7551914 MHz  
Power 39 dB  
continuously on  
WALTZ-16 modulated  
DATA PROCESSING  
Line broadening 3.0 Hz  
FT size 32768  
Total time 30 min

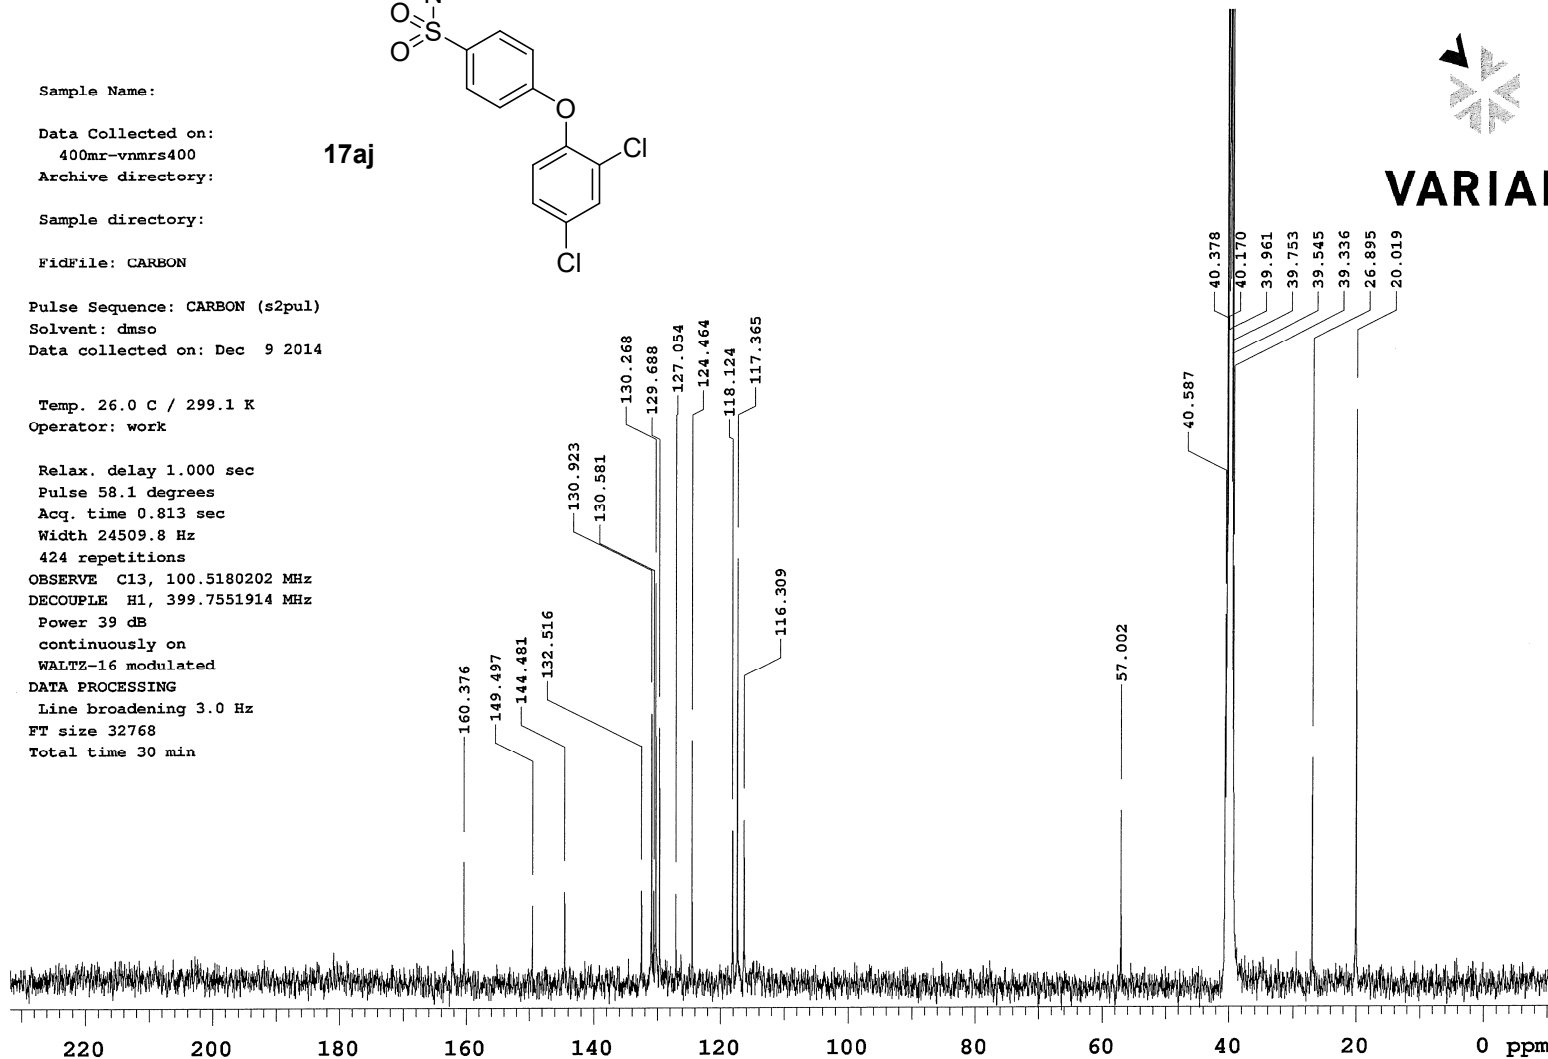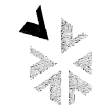

VARIAN



JY-5-304-1H

Sample Name:  
jy-5-304p-cdc13  
Data Collected on:  
400mr-vmrs400  
Archive directory:

Sample directory:

FidFile: jy-5-304p-cdc13

Pulse Sequence: PROTON (s2pul)  
Solvent: cdcl3  
Data collected on: Oct 11 2013

Temp. 26.0 C / 299.1 K  
Operator: work

Relax. delay 1.000 sec  
Pulse 45.0 degrees  
Acq. time 1.278 sec  
Width 6410.3 Hz  
16 repetitions  
OBSERVE H1, 399.7512853 MHz  
DATA PROCESSING  
Line broadening 0.5 Hz  
FT size 16384  
Total time 0 min 36 sec

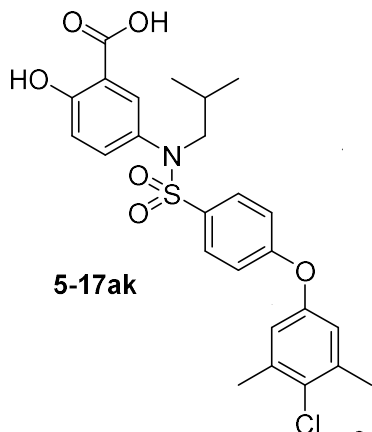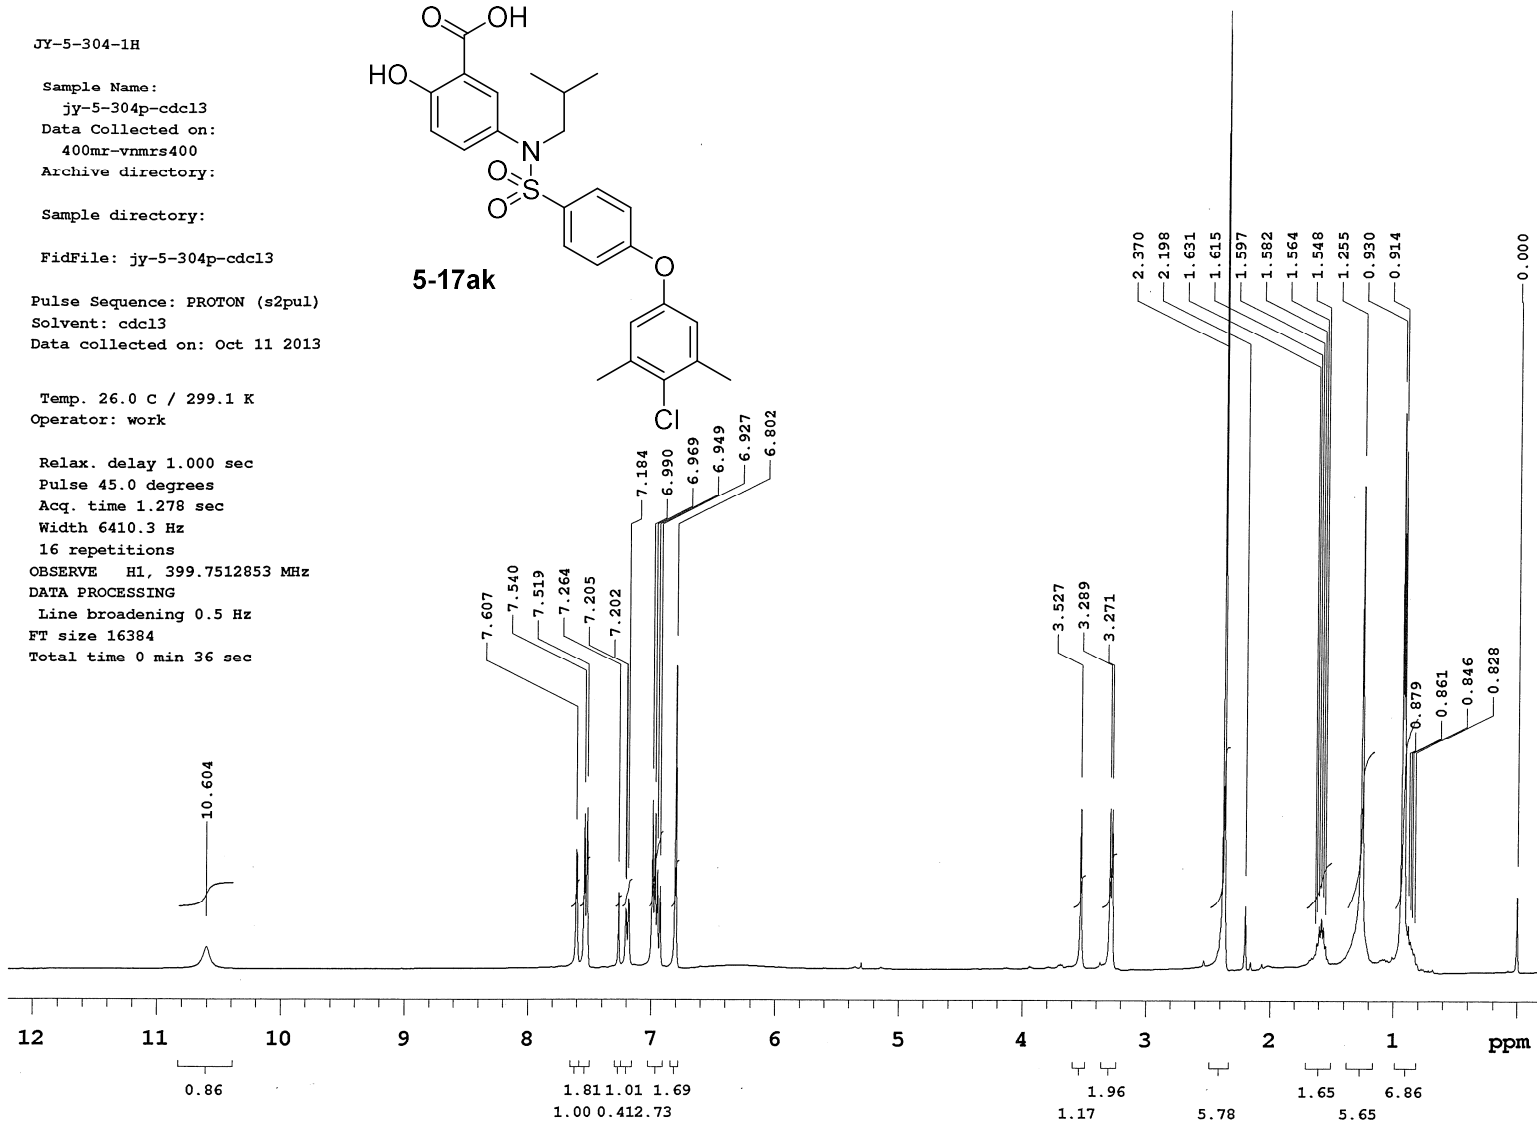

JY-5-304-13C

Sample Name:  
jy-5-304p-c13-cdcl3  
Data Collected on:  
400mr-vnmrs400  
Archive directory:

Sample directory:

FidFile: jy-5-304p-c13-cdcl3

Pulse Sequence: CARBON (s2pul)  
Solvent: cdcl3  
Data collected on: Oct 11 2013

Temp. 26.0 C / 299.1 K  
Operator: work

Relax. delay 1.000 sec  
Pulse 58.1 degrees  
Acq. time 0.813 sec  
Width 21186.4 Hz  
1000 repetitions  
OBSERVE C13, 100.5175428 MHz  
DECOUPLE H1, 399.7532925 MHz  
Power 39 dB  
continuously on  
WALTZ-16 modulated  
DATA PROCESSING  
Line broadening 3.869 Hz  
FT size 32768  
Total time 30 min

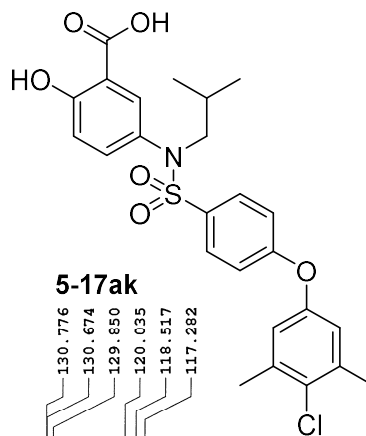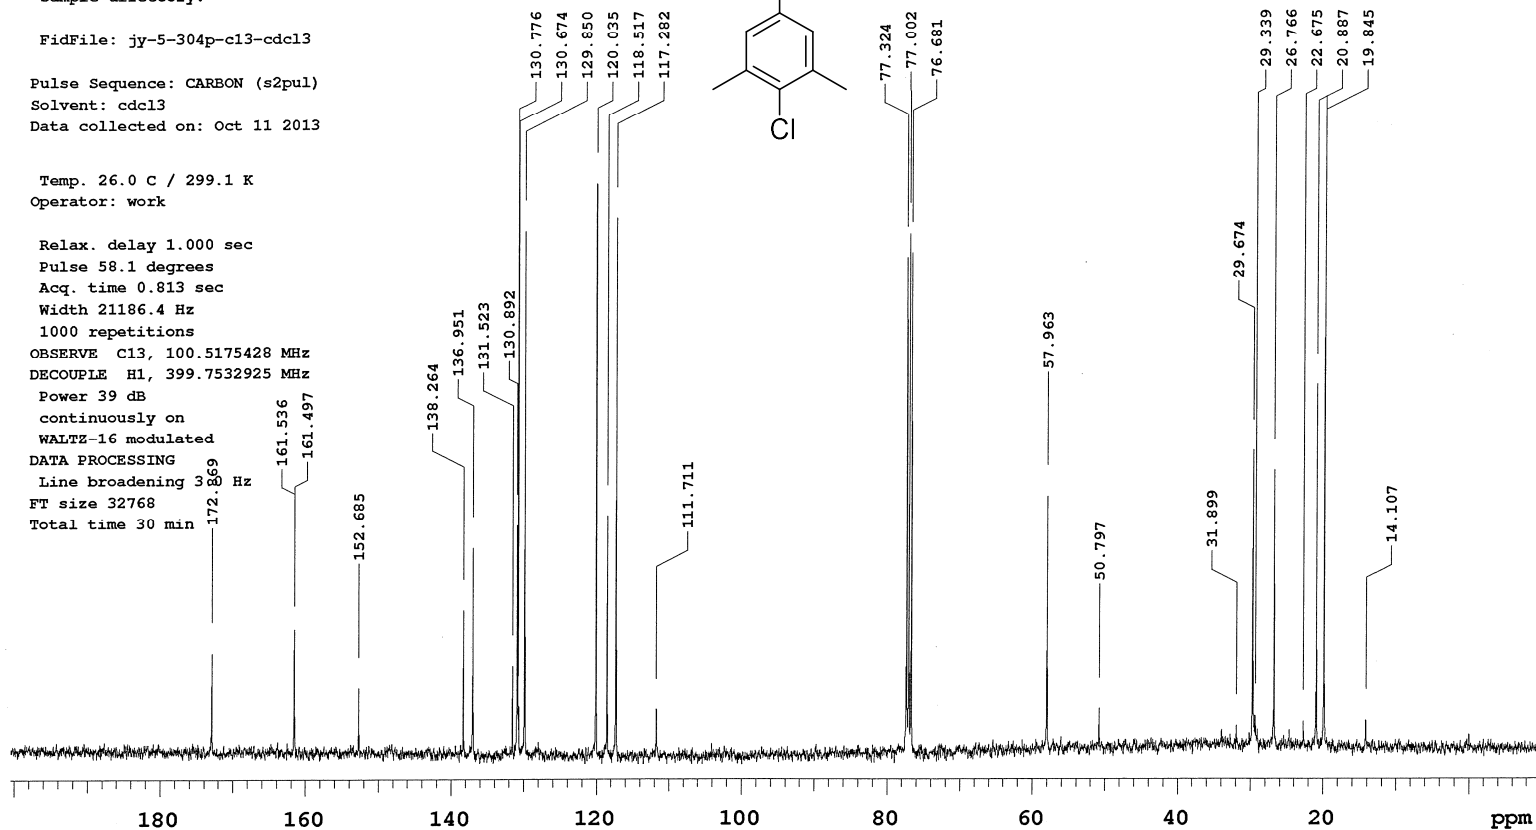

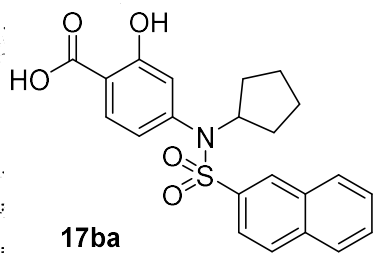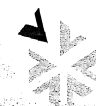

VARIAN

Sample Name:

Data Collected on:  
400mr-vnmrs400  
Archive directory:

Sample directory:

FidFile: PROTON

Pulse Sequence: PROTON (s2pul)  
Solvent: dmsc  
Data collected on: Oct 20 2014

Temp. 26.0 C / 299.1 K  
Operator: work

Relax. delay 3.000 sec  
Pulse 79.4 degrees  
Acq. time 1.278 sec  
Width 6410.3 Hz  
4 repetitions  
OBSERVE H1, 399.7531748 MHz  
DATA PROCESSING  
Line broadening 0.5 Hz  
FT size 16384  
Total time 0 min 17 sec

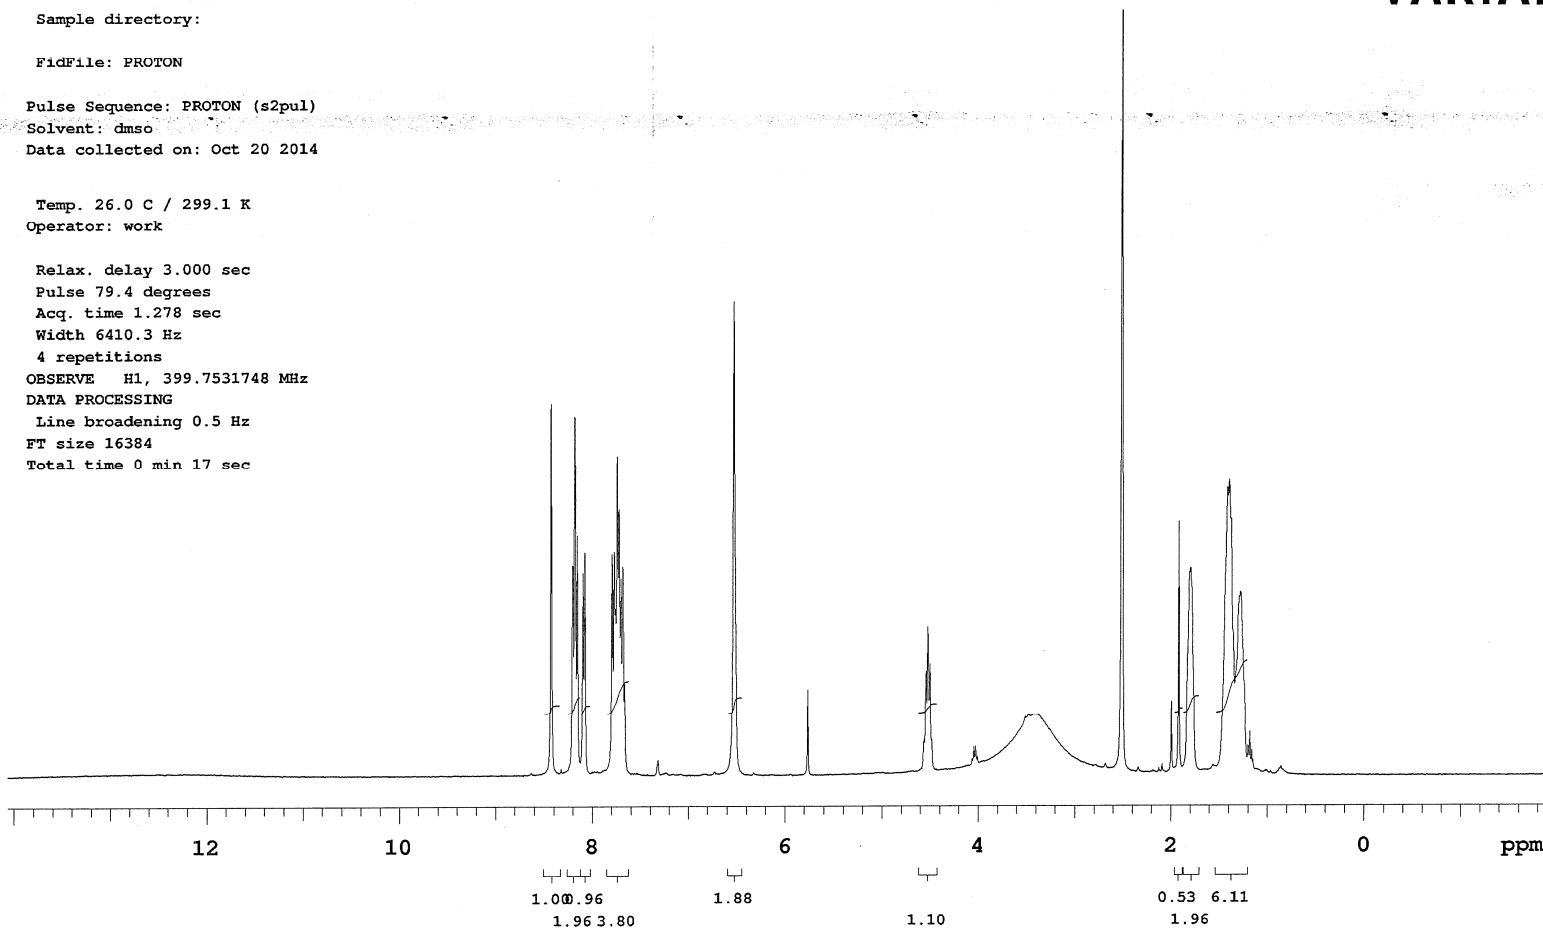

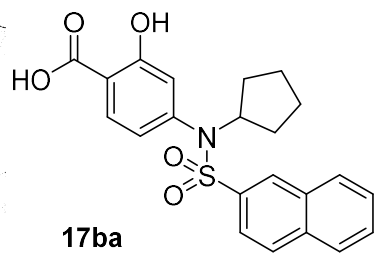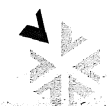

VARIAN

Sample Name:

Data Collected on:

400mr-vmrs400

Archive directory:

Sample directory:

FidFile: CARBON

Pulse Sequence: CARBON (s2pul)

Solvent: dmsd

Data collected on: Oct 20 2014

Temp. 26.0 C / 299.1 K

Operator: work

Relax. delay 1.000 sec

Pulse 58.1 degrees

Acq. time 0.813 sec

Width 25510.2 Hz

268 repetitions

OBSERVE C13, 100.5180202 MHz

DECOUPLE H1, 399.7551914 MHz

Power 39 dB

continuously on

WALTZ-16 modulated

DATA PROCESSING

Line broadening 3.0 Hz

FT size 32768

Total time 15 min

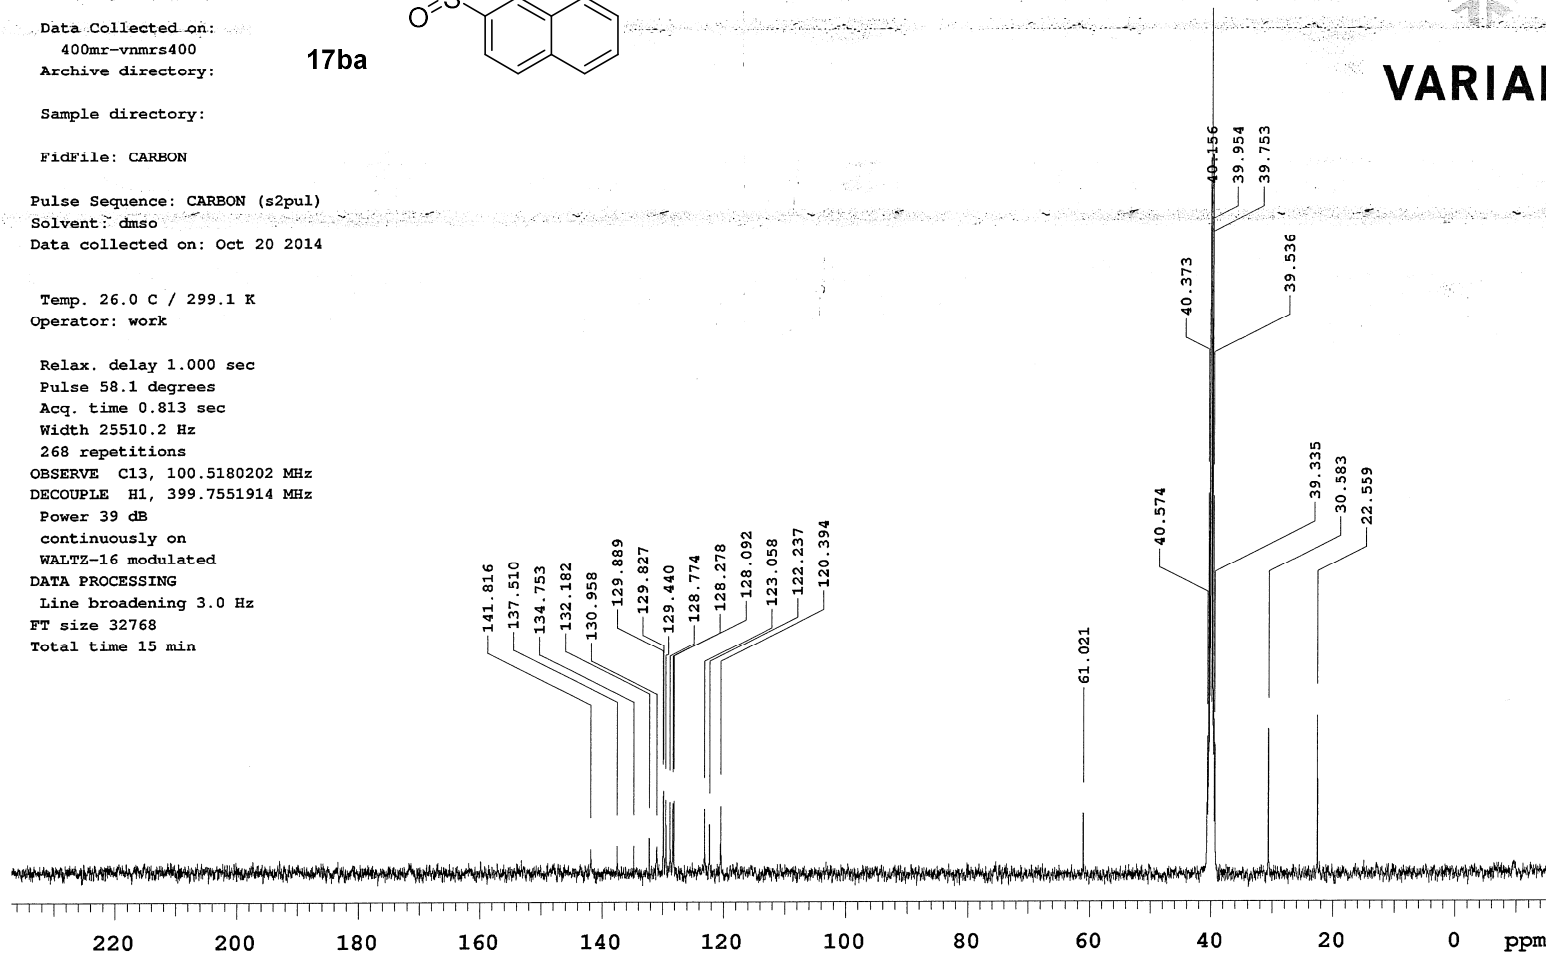

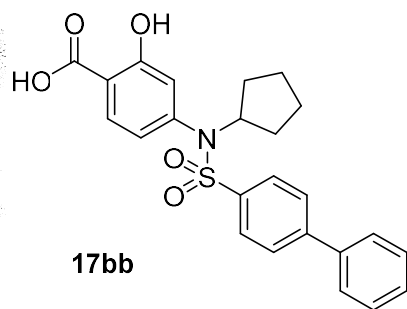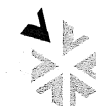

VARIAN

Sample Name:

Data Collected on:

400mr-vnmrs400

Archive directory:

Sample directory:

FidFile: PROTON

Pulse Sequence: PROTON (s2pul)

Solvent: dms0

Data collected on: Oct 21 2014

Temp. 26.0 C / 299.1 K

Operator: work

Relax. delay 1.000 sec

Pulse 79.4 degrees

Acq. time 1.278 sec

Width 6410.3 Hz

4 repetitions

OBSERVE H1, 399.7531926 MHz

DATA PROCESSING

Line broadening 0.5 Hz

FT size 16384

Total time 0 min 9 sec

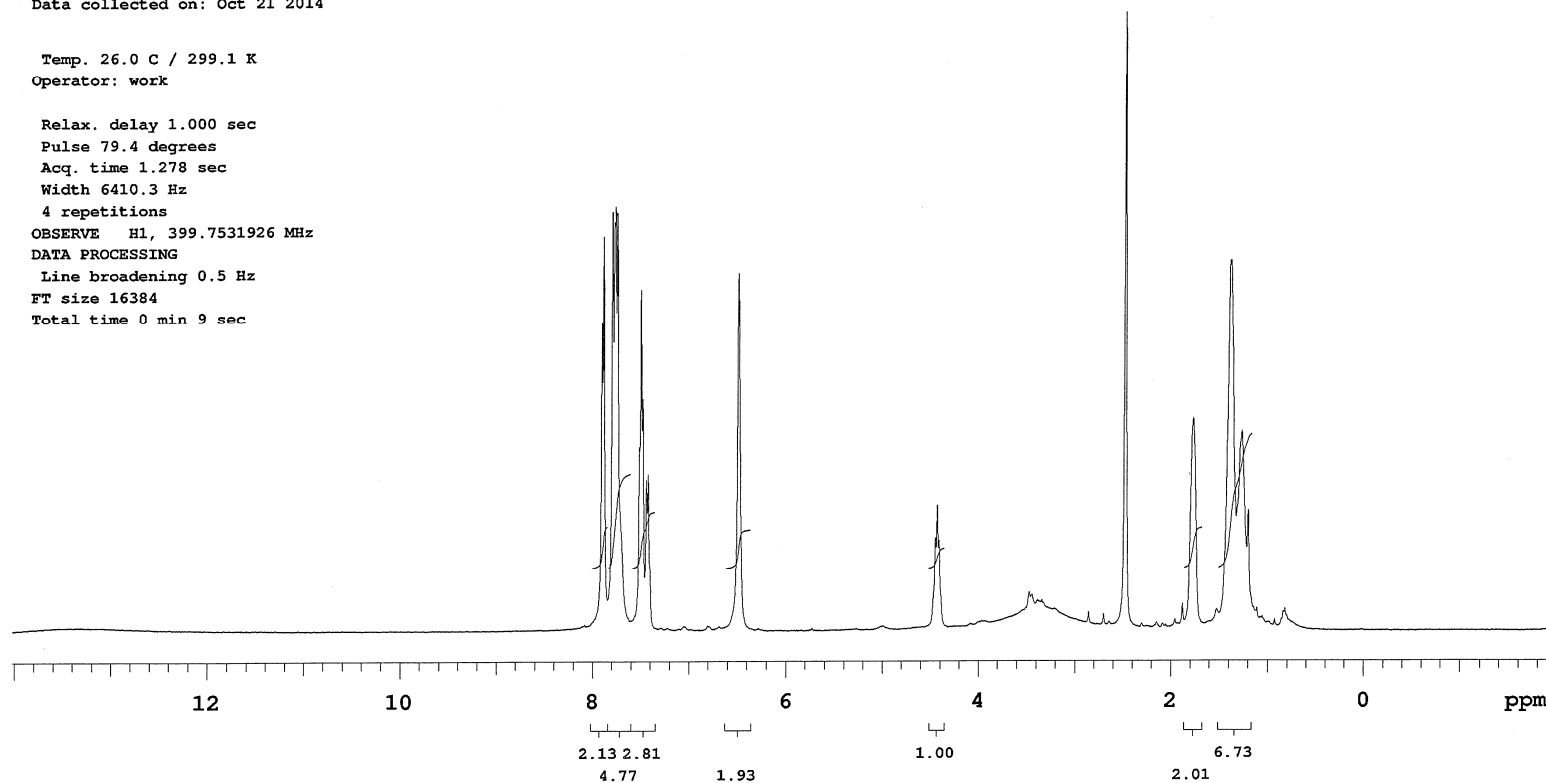

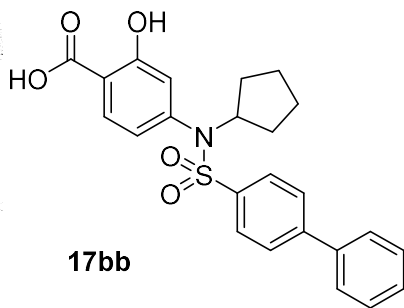

Sample Name:  
RR\_2173\_f19\_c  
Data Collected on:  
400mr-vnmrs400  
Archive directory:

Sample directory:

FidFile: CARBON

Pulse Sequence: CARBON (s2pul)  
Solvent: dmso  
Data collected on: Oct 21 2014

Temp. 26.0 C / 299.1 K  
Operator: work

Relax. delay 1.000 sec  
Pulse 58.1 degrees  
Acq. time 0.813 sec  
Width 24509.8 Hz  
456 repetitions

OBSERVE C13, 100.5180656 MHz  
DECOUPLE H1, 399.7551914 MHz  
Power 39 dB

continuously on  
WALTZ-16 modulated

DATA PROCESSING  
Line broadening 3.0 Hz  
FT size 32768  
Total time 30 min

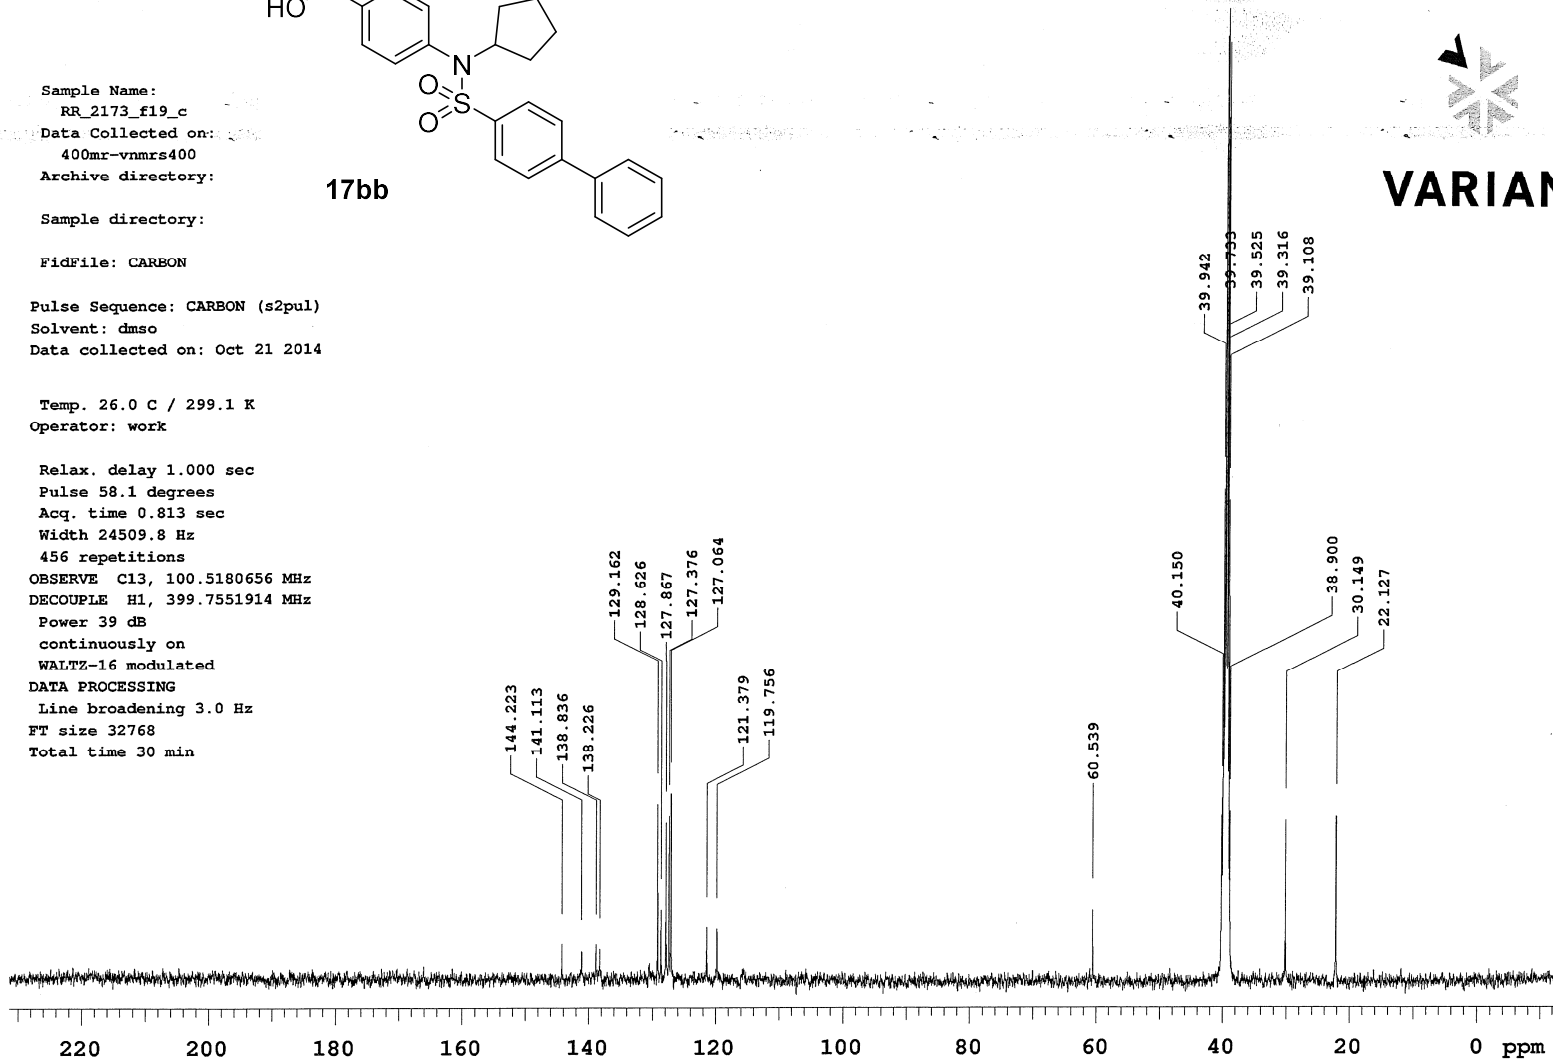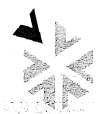

VARIAN

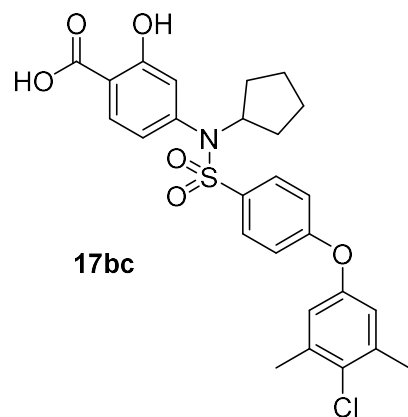

Sample Name:

Data Collected on:

400mr-vnmrs400

Archive directory:

Sample directory:

FidFile: PROTON

Pulse Sequence: PROTON (s2pul)

Solvent: dms0

Data collected on: Dec 1 2014

Temp. 26.0 C / 299.1 K

Operator: work

Relax. delay 1.000 sec

Pulse 79.4 degrees

Acq. time 1.278 sec

Width 6410.3 Hz

4 repetitions

OBSERVE H1, 399.7529965 MHz

DATA PROCESSING

Line broadening 0.5 Hz

FT size 16384

Total time 0 min 9 sec

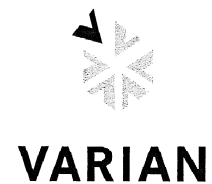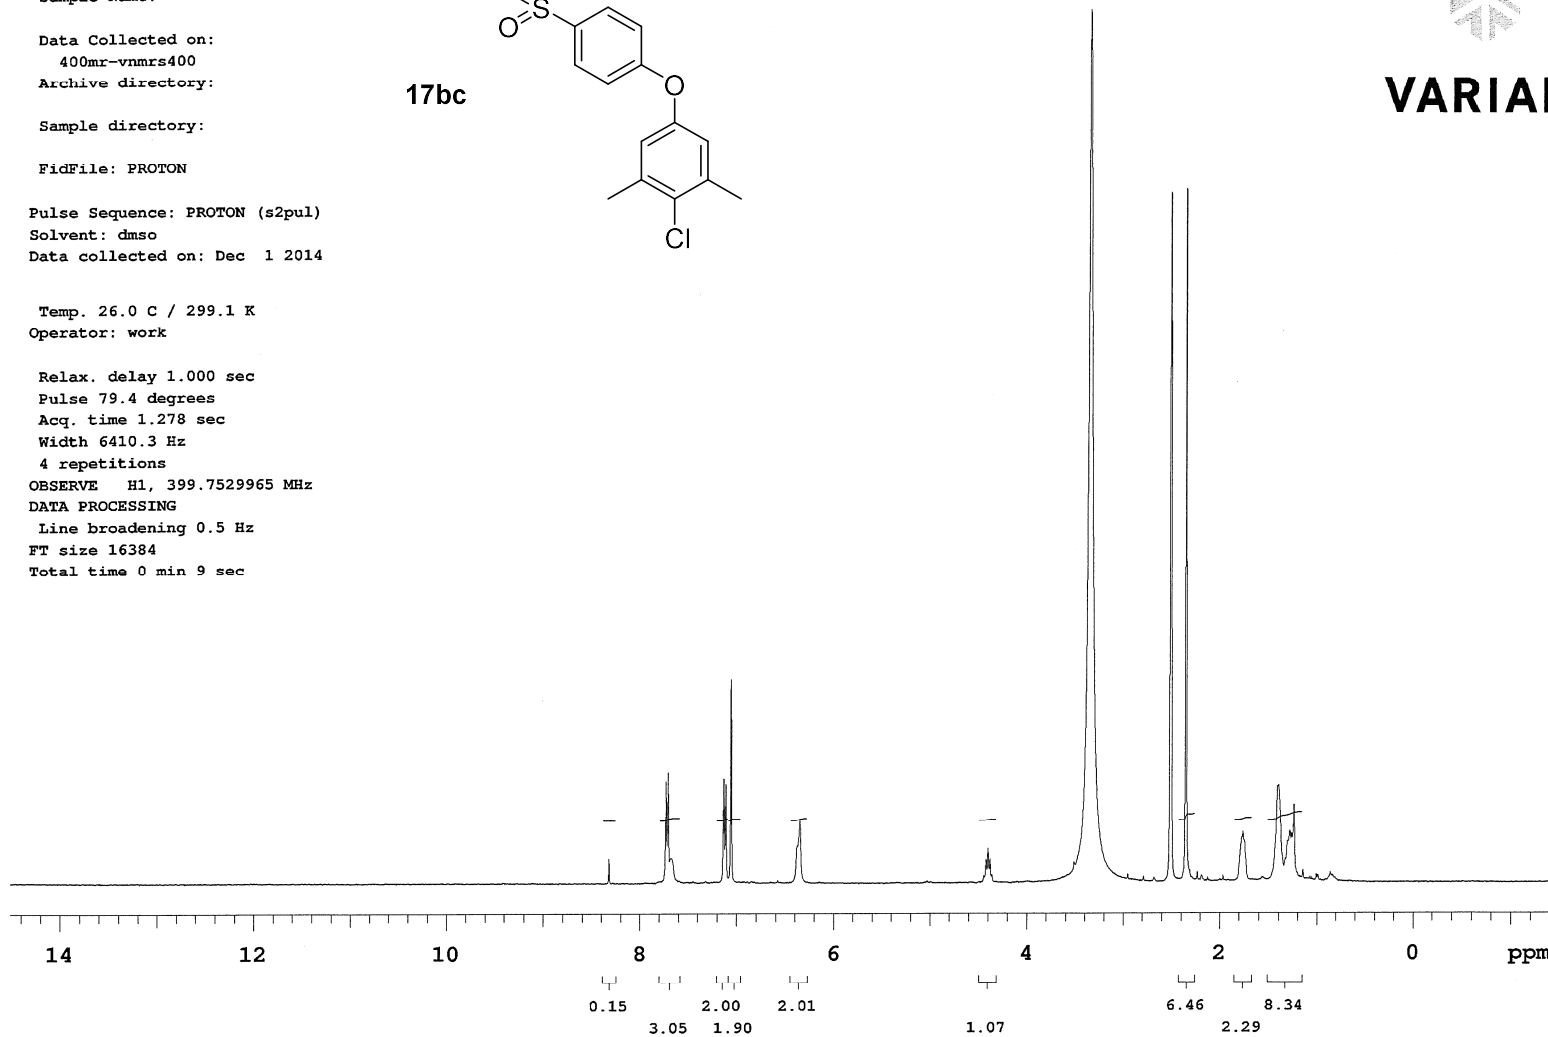

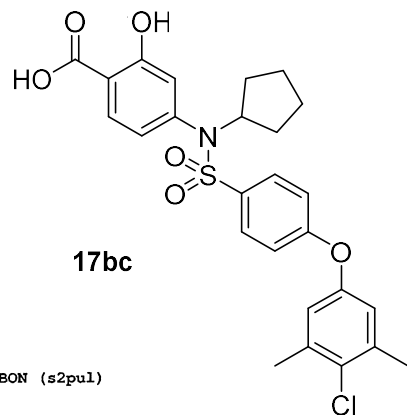

Sample Name:

Data Collected on:  
400mr-vmrs400  
Archive directory:

Sample directory:

Fidfile: CARBON

Pulse Sequence: CARBON (s2pul)  
Solvent: dmsd  
Data collected on: Dec 9 2014

Temp. 26.0 C / 299.1 K  
Operator: work

Relax. delay 1.000 sec  
Pulse 58.1 degrees  
Acq. time 0.813 sec  
Width 24509.8 Hz  
776 repetitions  
OBSERVE C13, 100.5180202 MHz  
DECOUPLE H1, 399.7551914 MHz  
Power 39 dB  
continuously on  
WALTZ-16 modulated  
DATA PROCESSING  
Line broadening 3.0 Hz  
FT size 32768  
Total time 30 min

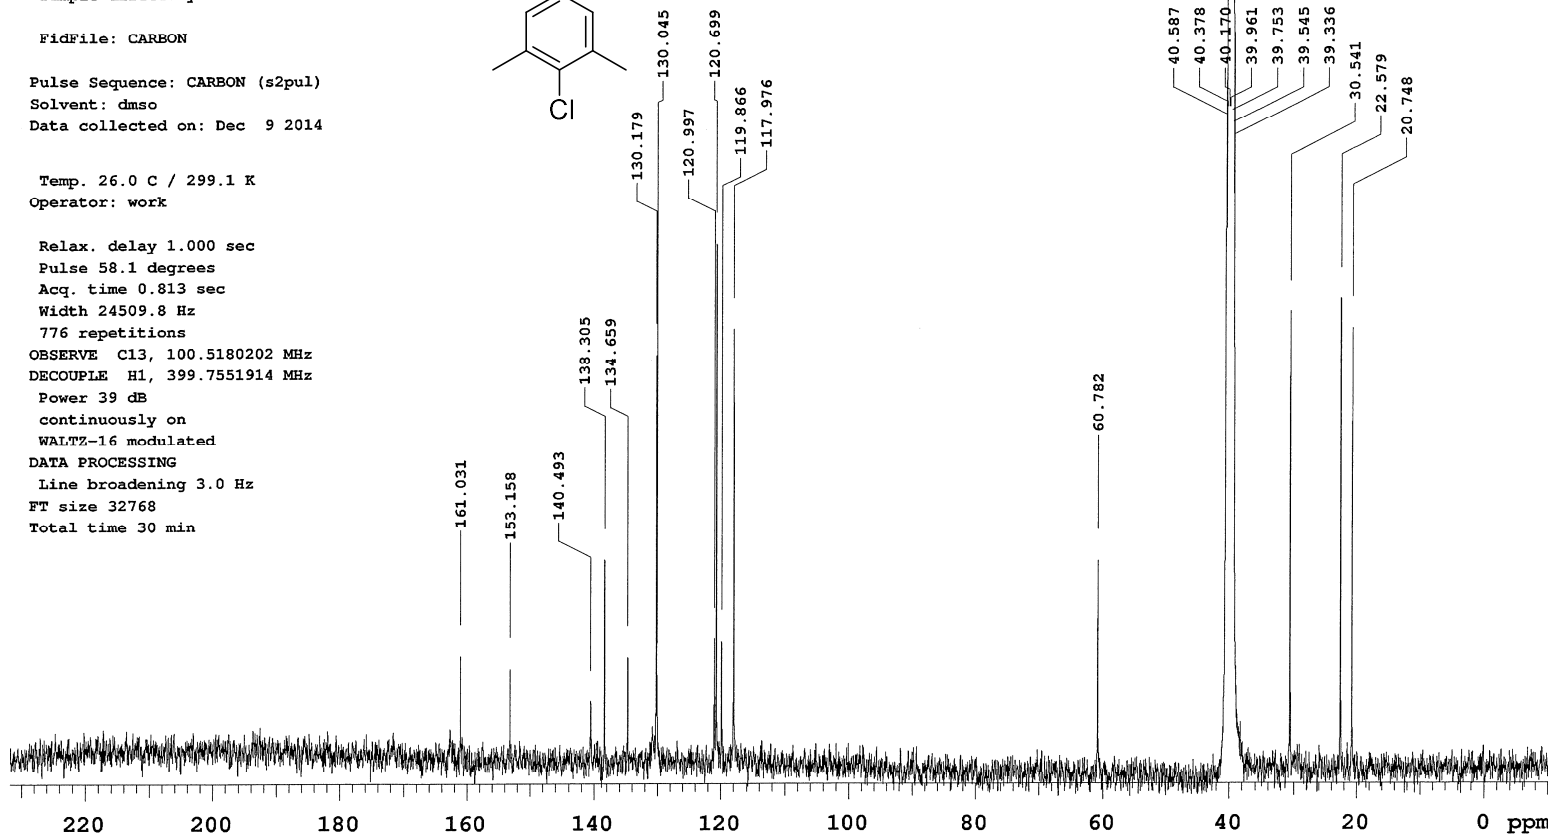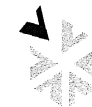

VARIAN



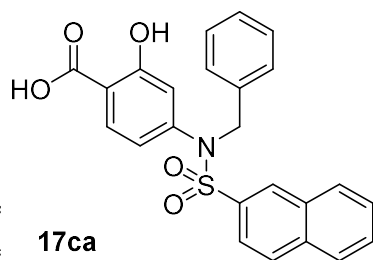

Sample Name:

Data Collected on:

400mr-vnmrs400

Archive directory:

Sample directory:

FidFile: PROTON

Pulse Sequence: PROTON (s2pul)

Solvent: dms0

Data collected on: Dec 9 2014

Temp. 26.0 C / 299.1 K

Operator: work

Relax. delay 3.000 sec

Pulse 79.4 degrees

Acq. time 1.278 sec

Width 6410.3 Hz

4 repetitions

OBSERVE H1, 399.7531748 MHz

DATA PROCESSING

Line broadening 0.5 Hz

FT size 16384

Total time 0 min 17 sec

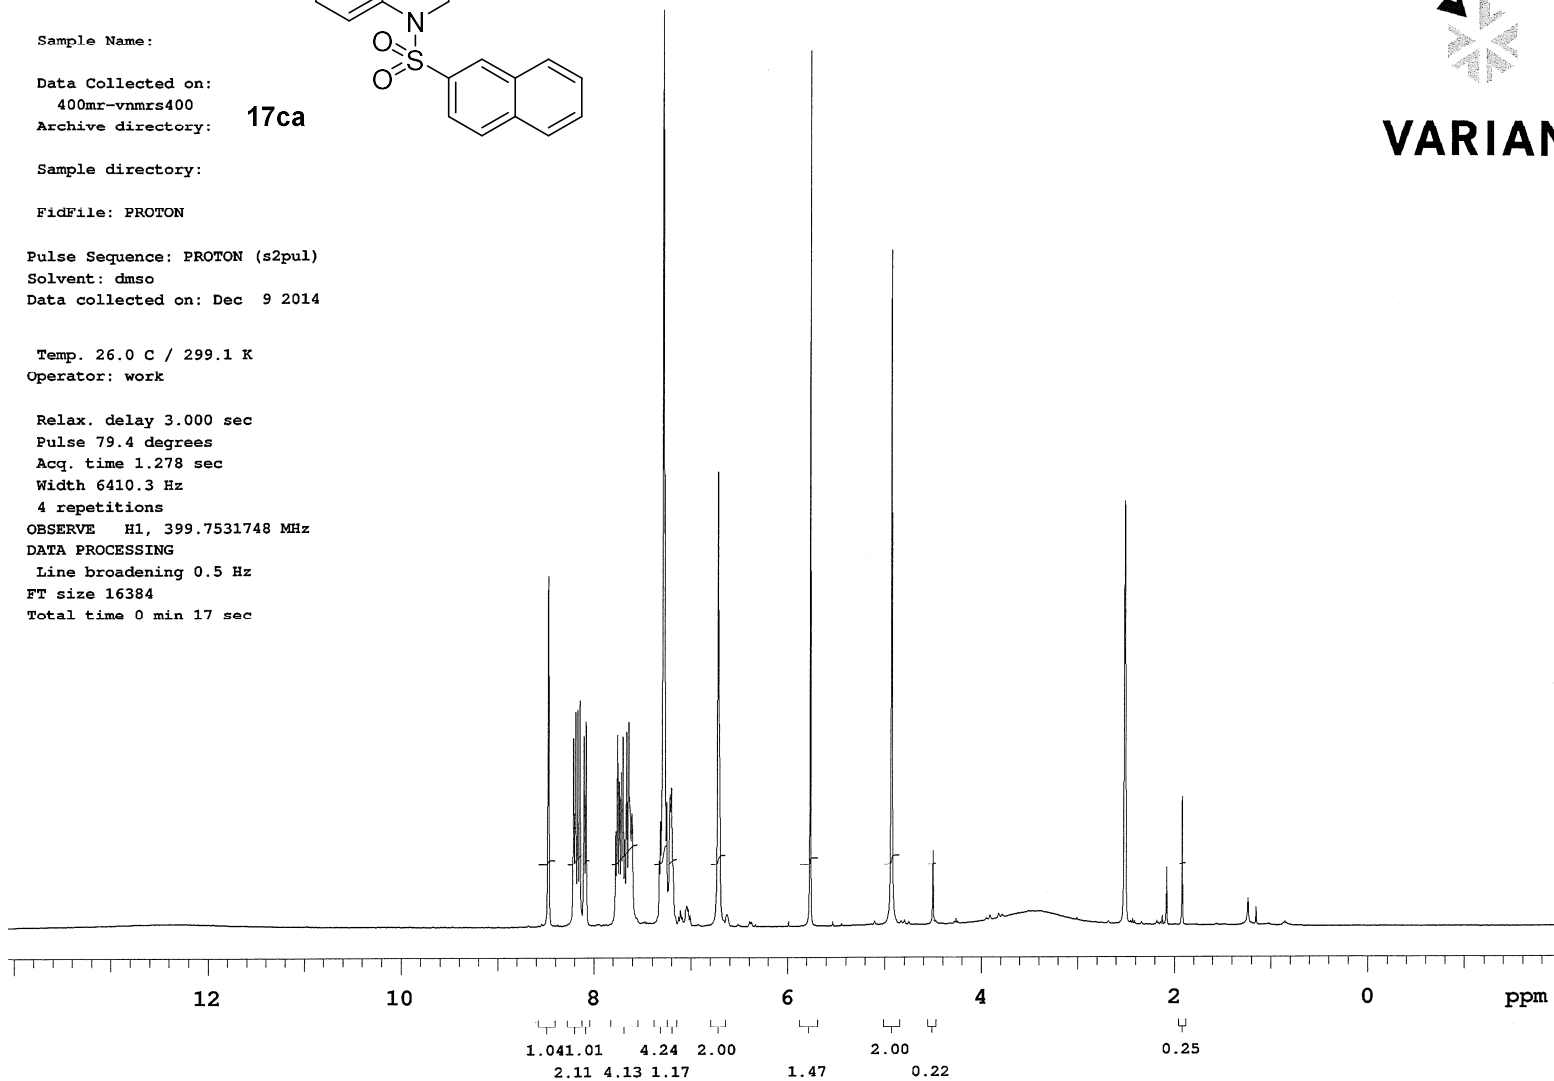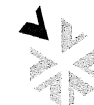

VARIAN

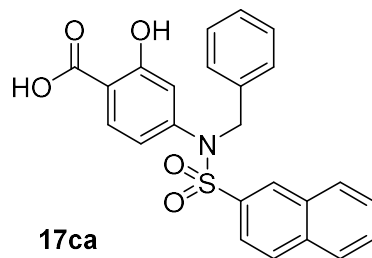

17ca

Sample Name:

Data Collected on:

400mr-vmrms400

Archive directory:

Sample directory:

FidFile: CARBON

Pulse Sequence: CARBON (s2pul)

Solvent: dmsd

Data collected on: Dec 9 2014

Temp. 26.0 C / 299.1 K

Operator: work

Relax. delay 1.000 sec

Pulse 58.1 degrees

Acq. time 0.813 sec

Width 24509.8 Hz

712 repetitions

OBSERVE C13, 100.5180202 MHz

DECOUPLE H1, 399.7551914 MHz

Power 39 dB

continuously on

WALTZ-16 modulated

DATA PROCESSING

Line broadening 3.0 Hz

FT size 32768

Total time 30 min

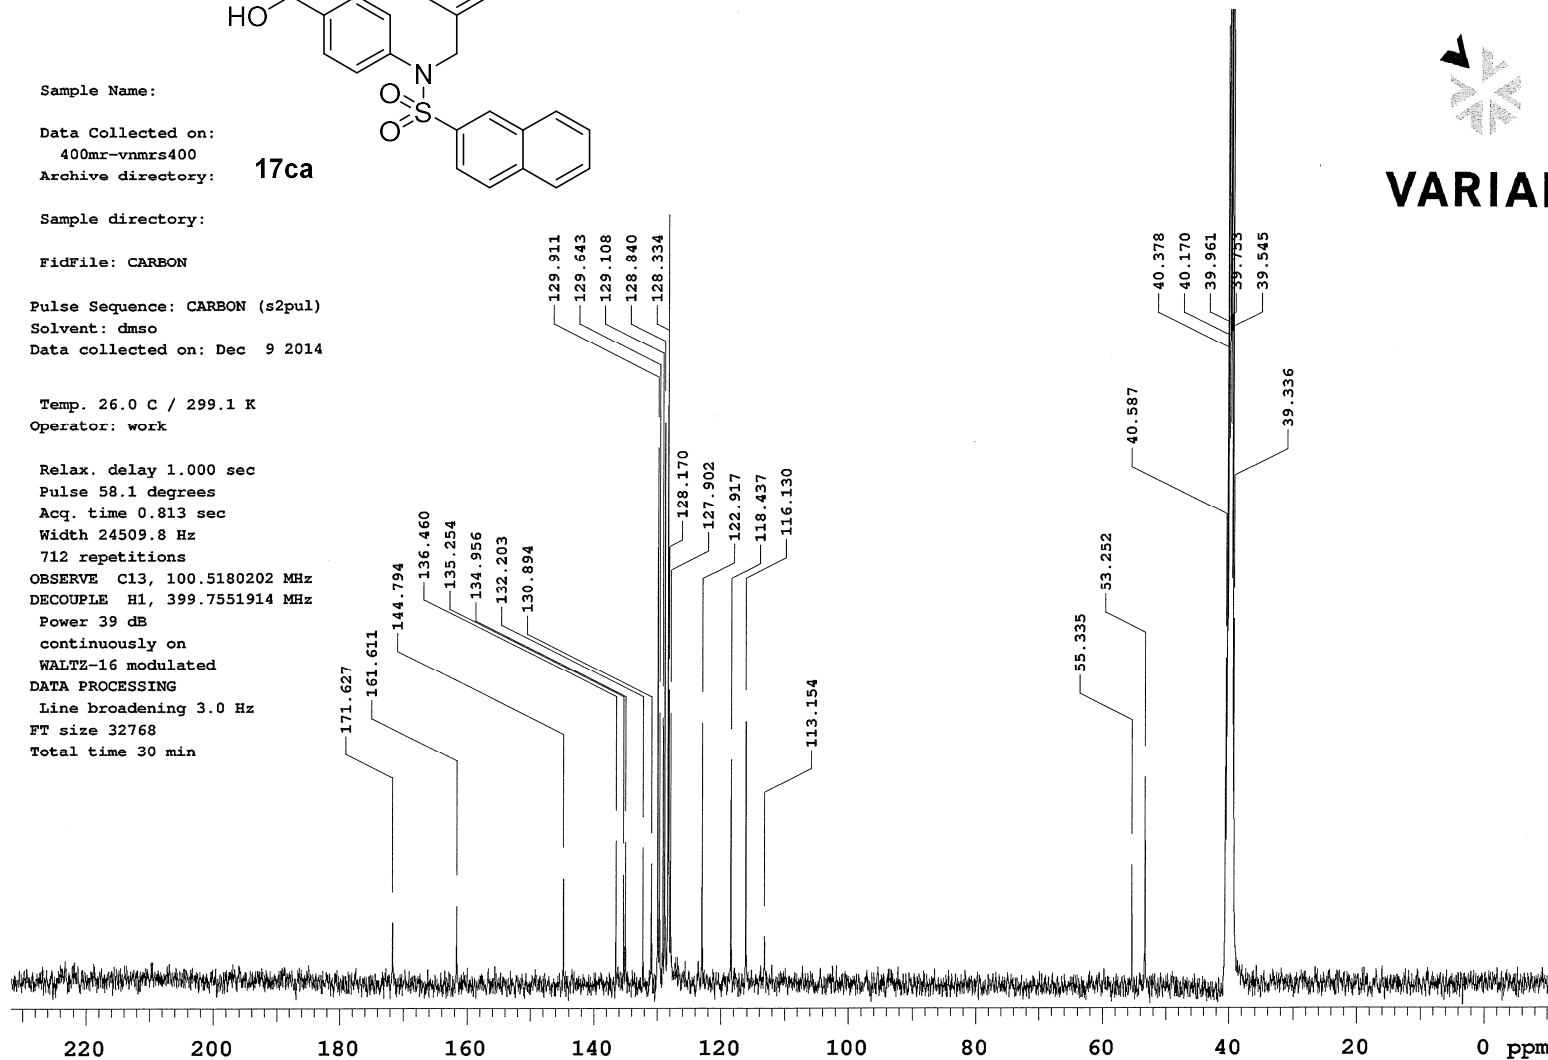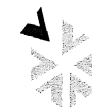

VARIAN

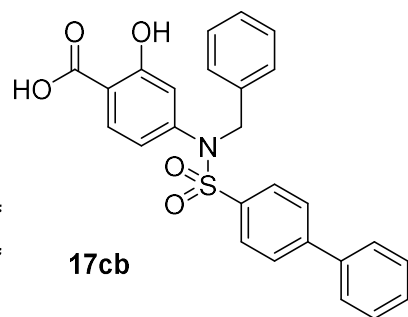

Sample Name:

Data Collected on:

400mr-vnmrs400

Archive directory:

Sample directory:

Fidfile: PROTON

Pulse Sequence: PROTON (s2pul)

Solvent: dmsd

Data collected on: Dec 9 2014

Temp. 26.0 C / 299.1 K

Operator: work

Relax. delay 3.000 sec

Pulse 79.4 degrees

Acq. time 1.278 sec

Width 6410.3 Hz

4 repetitions

OBSERVE H1, 399.7531926 MHz

DATA PROCESSING

Line broadening 0.5 Hz

FT size 16384

Total time 0 min 17 sec

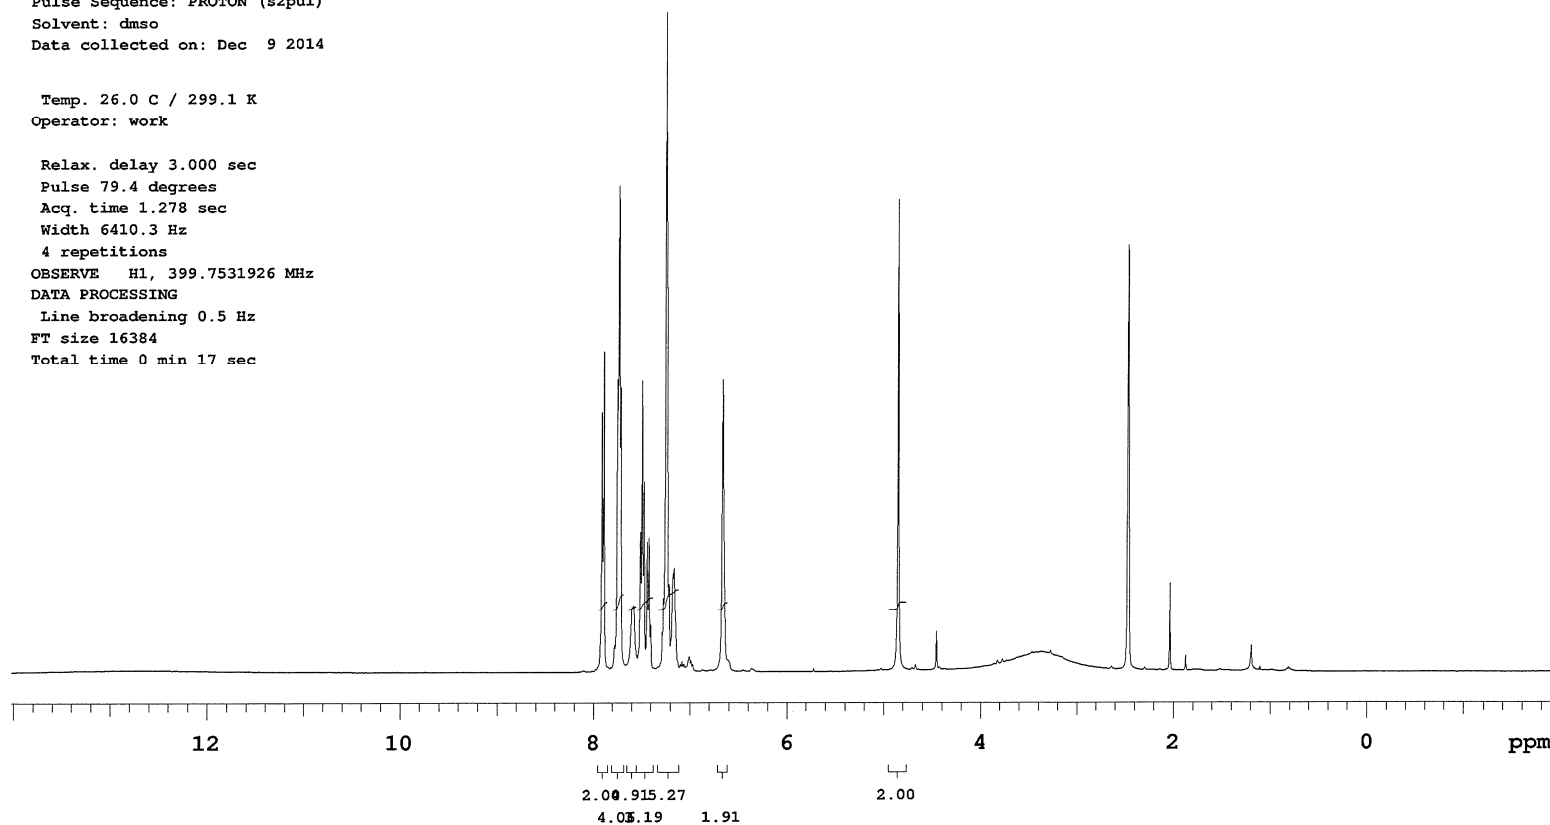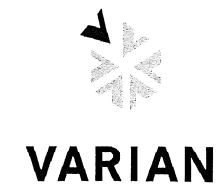

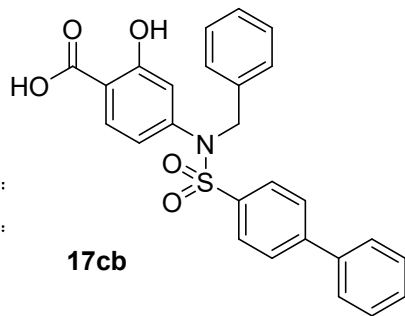

17cb

Sample Name:

Data Collected on:  
400mr-vmrs400  
Archive directory:

Sample directory:

Fidfile: CARBON

Pulse Sequence: CARBON (s2pul)  
Solvent: dmsd  
Data collected on: Dec 9 2014

Temp. 26.0 C / 299.1 K  
Operator: work

Relax. delay 1.000 sec  
Pulse 58.1 degrees  
Acq. time 0.813 sec  
Width 24509.8 Hz  
304 repetitions  
OBSERVE C13, 100.5180202 MHz  
DECOUPLE H1, 399.7551914 MHz  
Power 39 dB  
continuously on  
WALTZ-16 modulated  
DATA PROCESSING  
Line broadening 3.0 Hz  
FT size 32768  
Total time 30 min

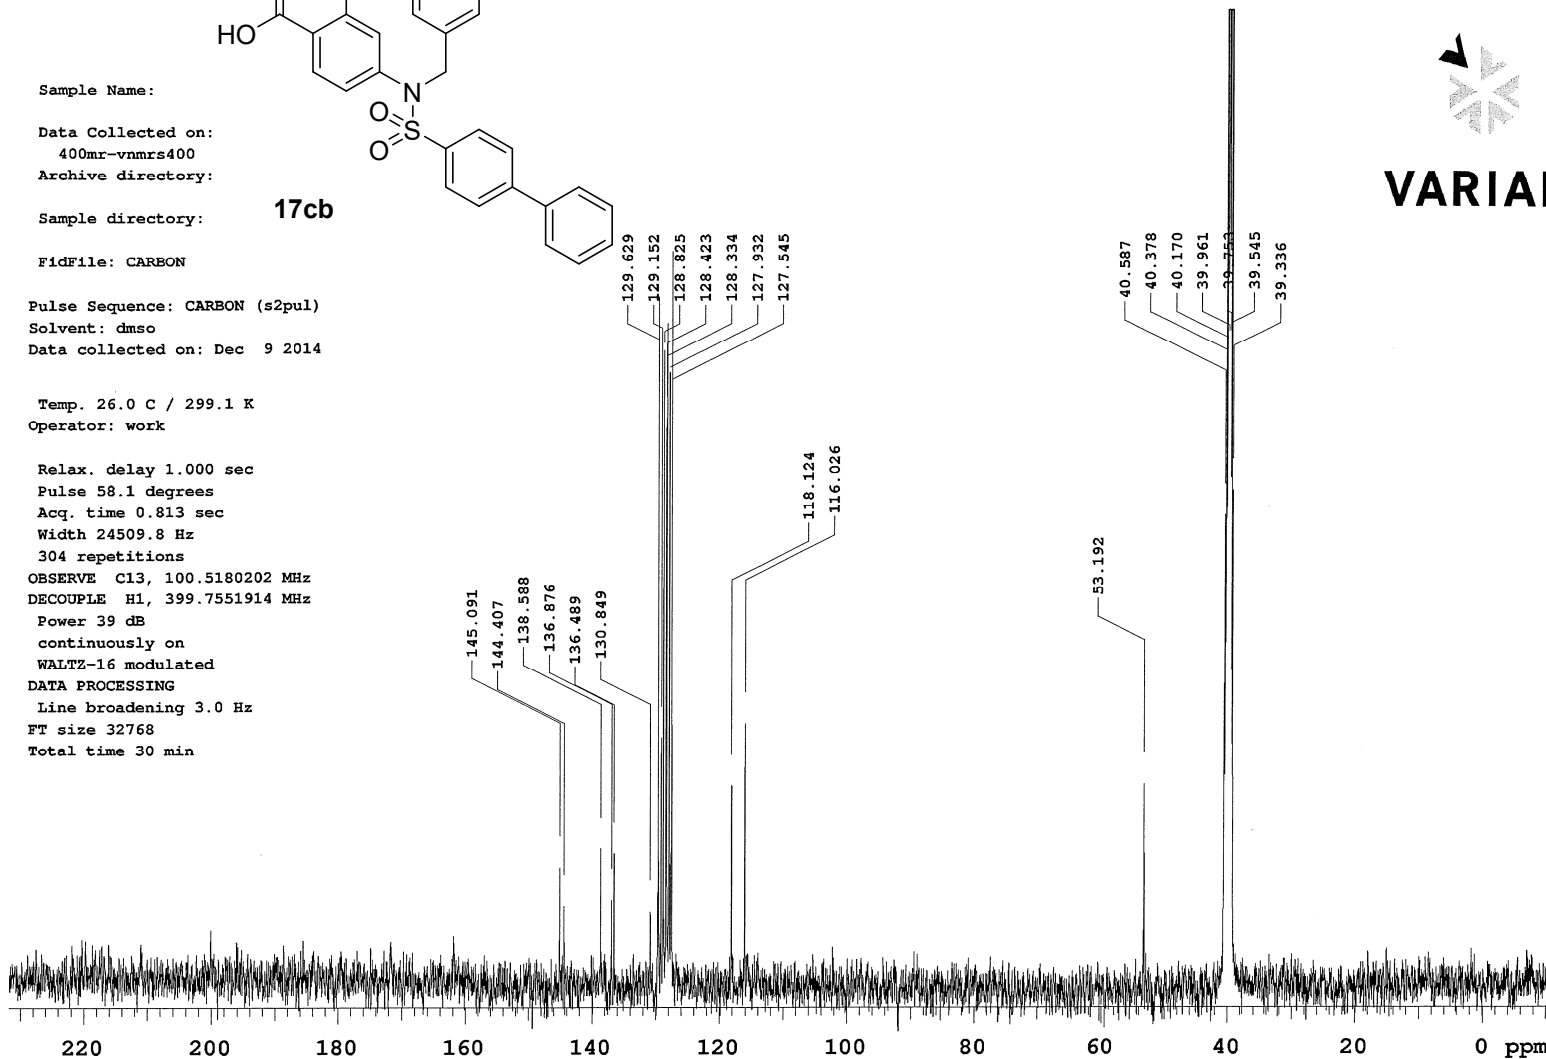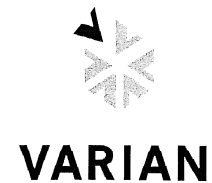

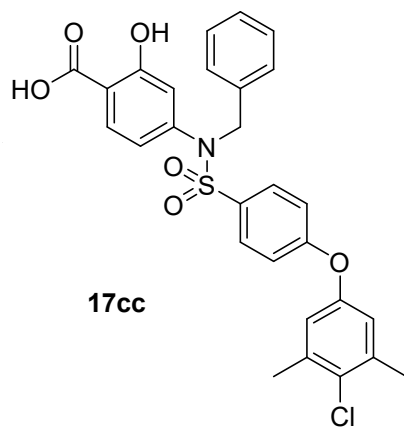

Sample Name:

Data Collected on:  
400mr-vnmrs400  
Archive directory:

Sample directory:

FidFile: PROTON

Pulse Sequence: PROTON (s2pul)  
Solvent: dms0  
Data collected on: Dec 12 2014

Temp. 26.0 C / 299.1 K  
Operator: work

Relax. delay 3.000 sec  
Pulse 79.4 degrees  
Acq. time 1.278 sec  
Width 6410.3 Hz  
4 repetitions  
OBSERVE H1, 399.7531926 MHz  
DATA PROCESSING  
Line broadening 0.5 Hz  
FT size 16384  
Total time 0 min 17 sec

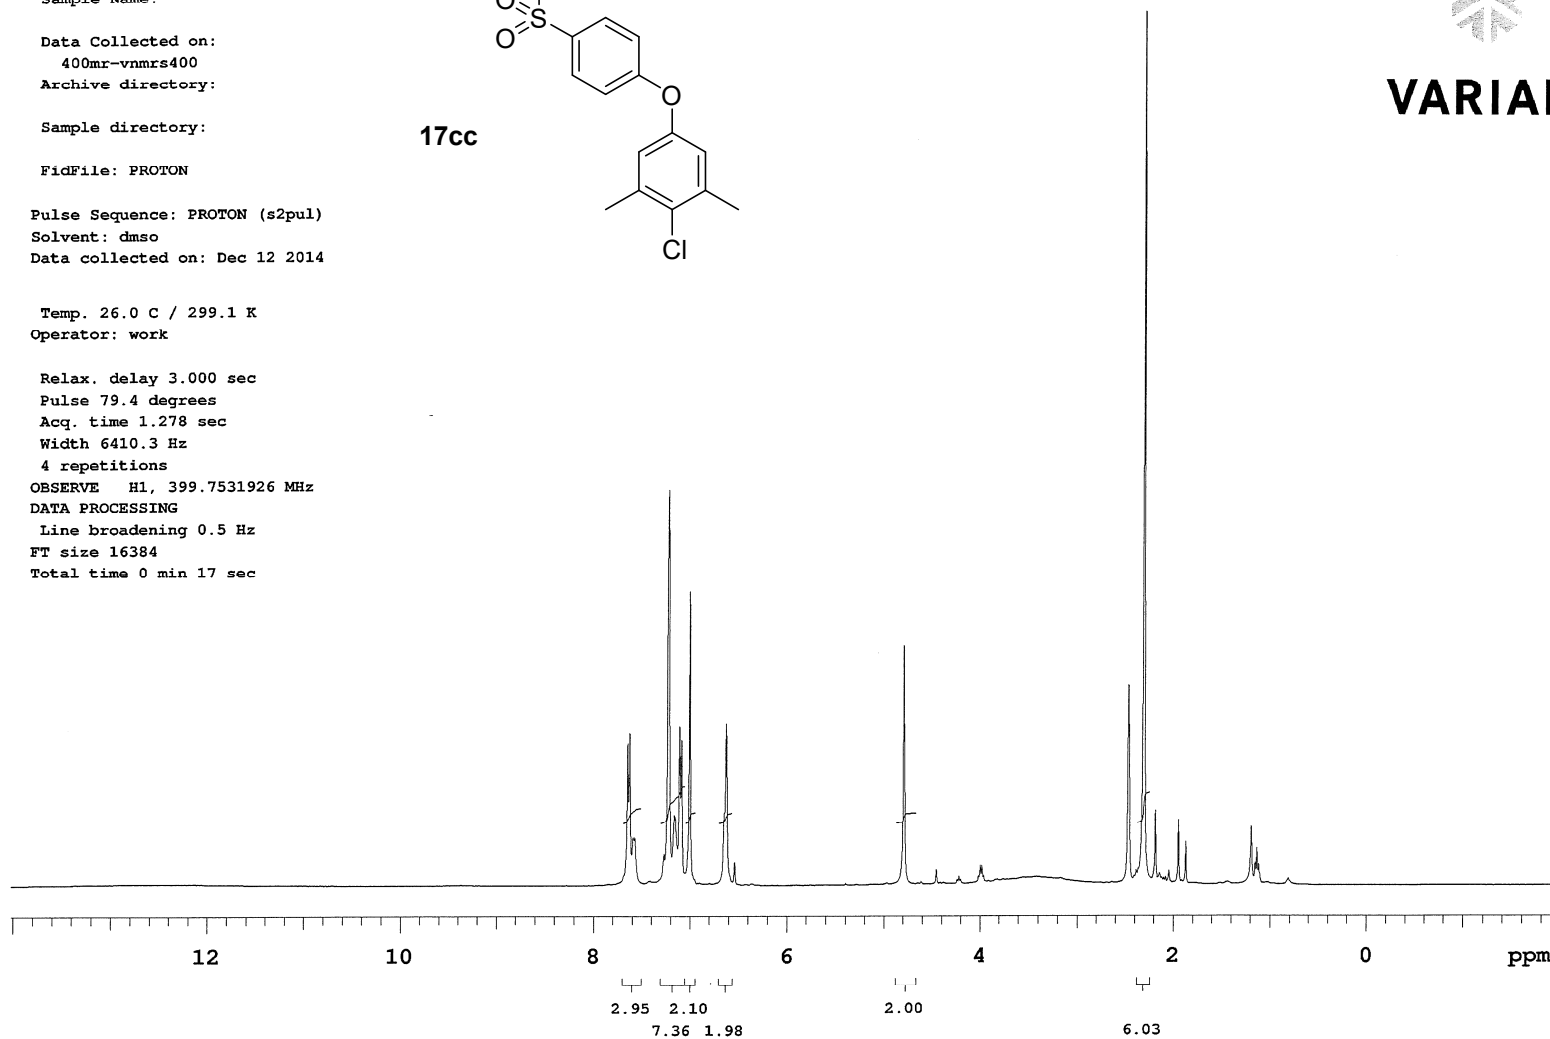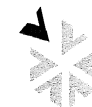

VARIAN

Sample Name:

Data Collected on:  
400mr-vnmrs400  
Archive directory:

Sample directory:

FidFile: CARBON

Pulse Sequence: CARBON (s2pul)  
Solvent: dmsd  
Data collected on: Dec 12 2014

Temp. 26.0 C / 299.1 K  
Operator: work

Relax. delay 1.000 sec  
Pulse 58.1 degrees  
Acq. time 0.813 sec  
Width 21186.4 Hz  
348 repetitions

OBSERVE C13, 100.5180202 MHz  
DECOUPLE H1, 399.7551914 MHz  
Power 39 dB  
continuously on  
WALTZ-16 modulated  
DATA PROCESSING  
Line broadening 3.0 Hz  
FT size 32768  
Total time 30 min

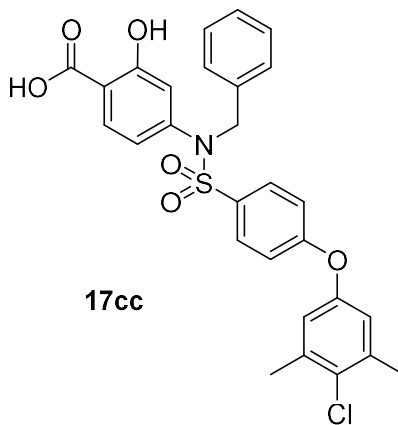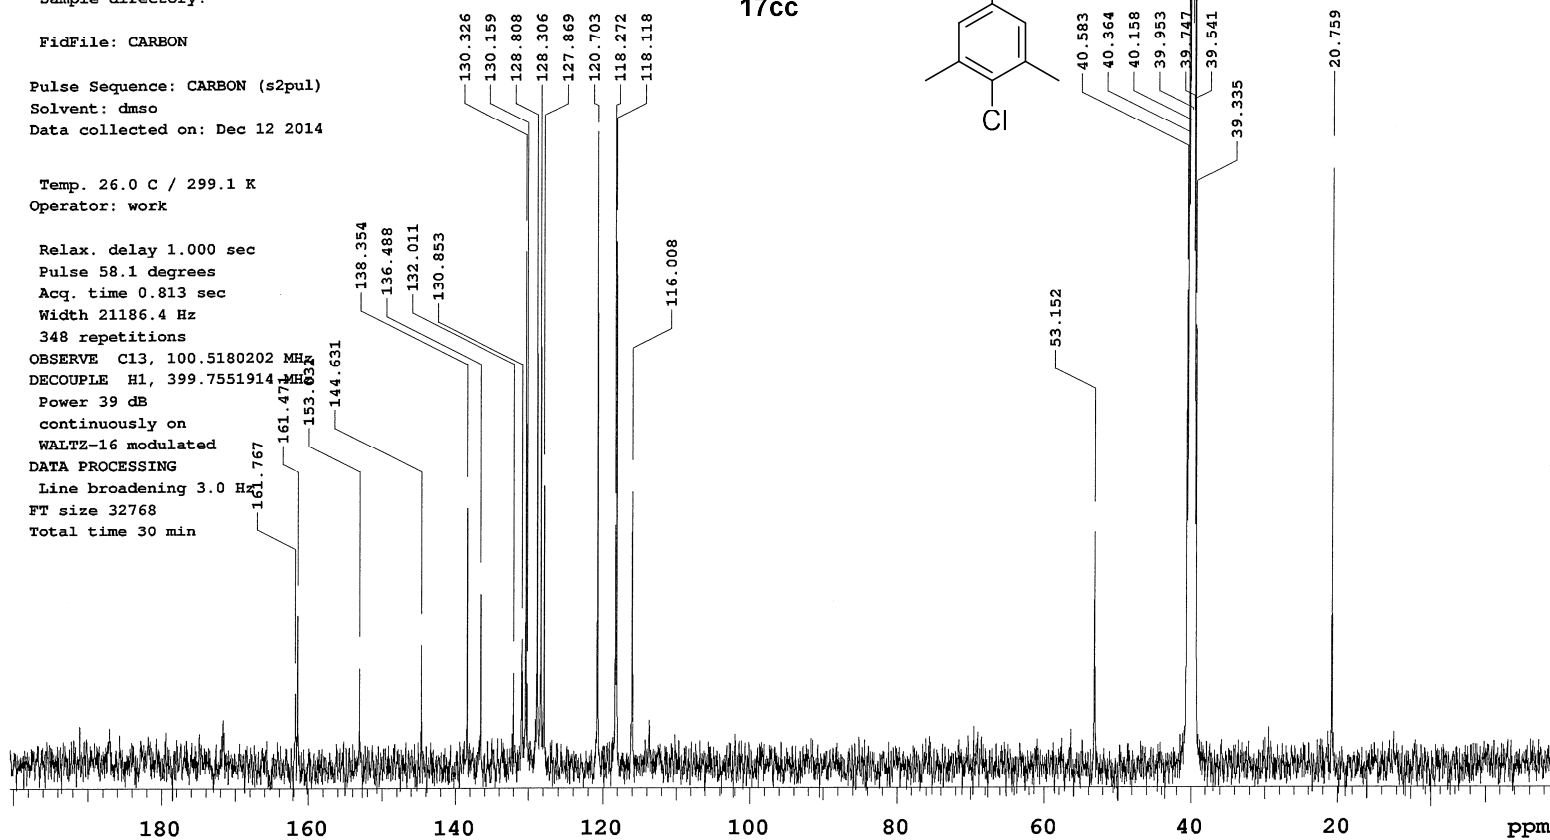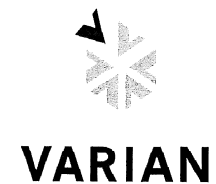

new experiment

Sample Name:

Data Collected on:

400mr-vnmrs400

Archive directory:

Sample directory:

FidFile: PROTON

Pulse Sequence: PROTON (s2pul)

Solvent: dms0

Data collected on: Jun 4 2015

Temp. 22.0 C / 295.1 K

Operator: work

Relax. delay 1.000 sec

Pulse 79.4 degrees

Acq. time 1.278 sec

Width 6410.3 Hz

Single scan

OBSERVE H1, 399.7531926 MHz

DATA PROCESSING

Line broadening 0.5 Hz

FT size 16384

Total time 0 min 2 sec

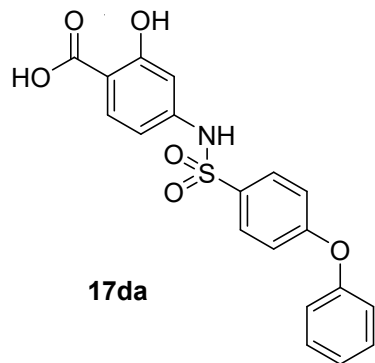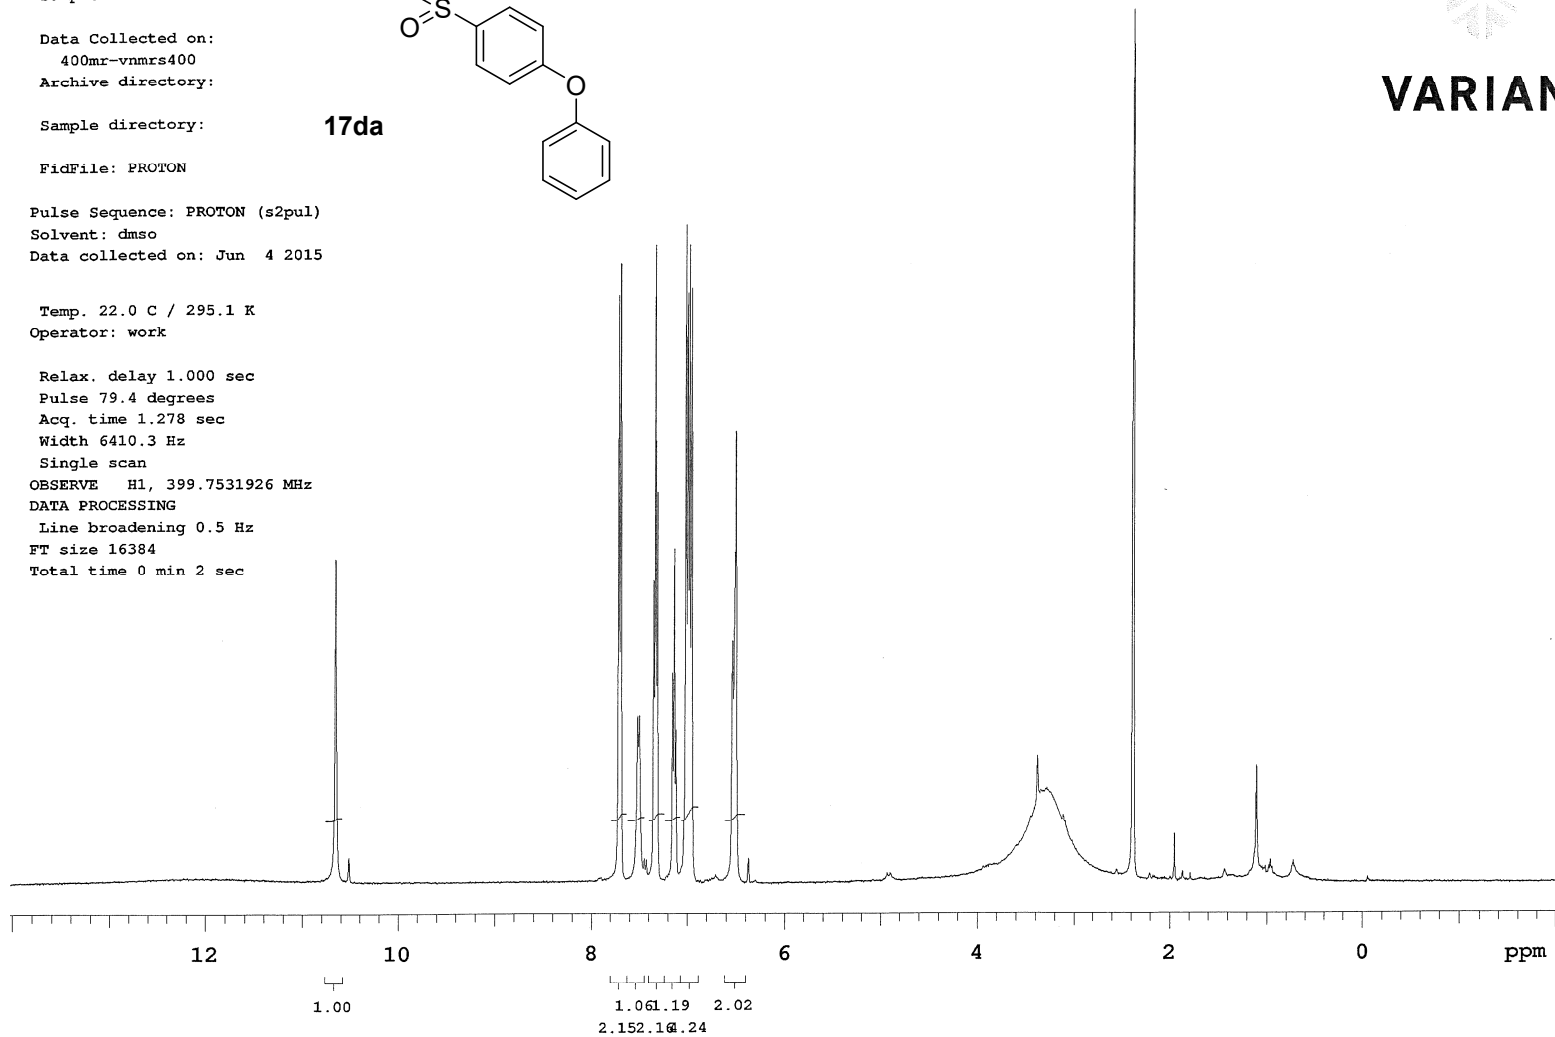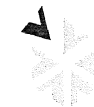

VARIAN

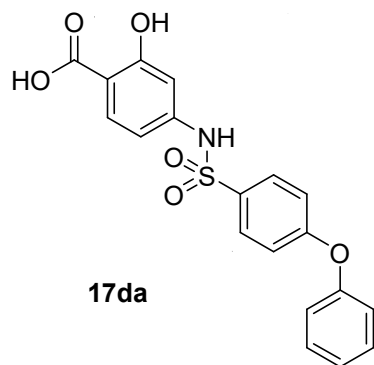

17da

Sample Name:

Data Collected on:

400mr-vmrns400

Archive directory:

Sample directory:

Fidfile: CARBON

Pulse Sequence: CARBON (s2pul)

Solvent: dmsO

Data collected on: Jun 4 2015

Temp. 22.0 C / 295.1 K

Operator: work

Relax. delay 1.000 sec

Pulse 58.1 degrees

Acq. time 0.813 sec

Width 24509.8 Hz

172 repetitions

OBSERVE C13, 100.5180202 MHz

DECOUPLE H1, 399.7551914 MHz

Power 39 dB

continuously on

WALTZ-16 modulated

DATA PROCESSING

Line broadening 3.0 Hz

FT size 32768

Total time 30 min

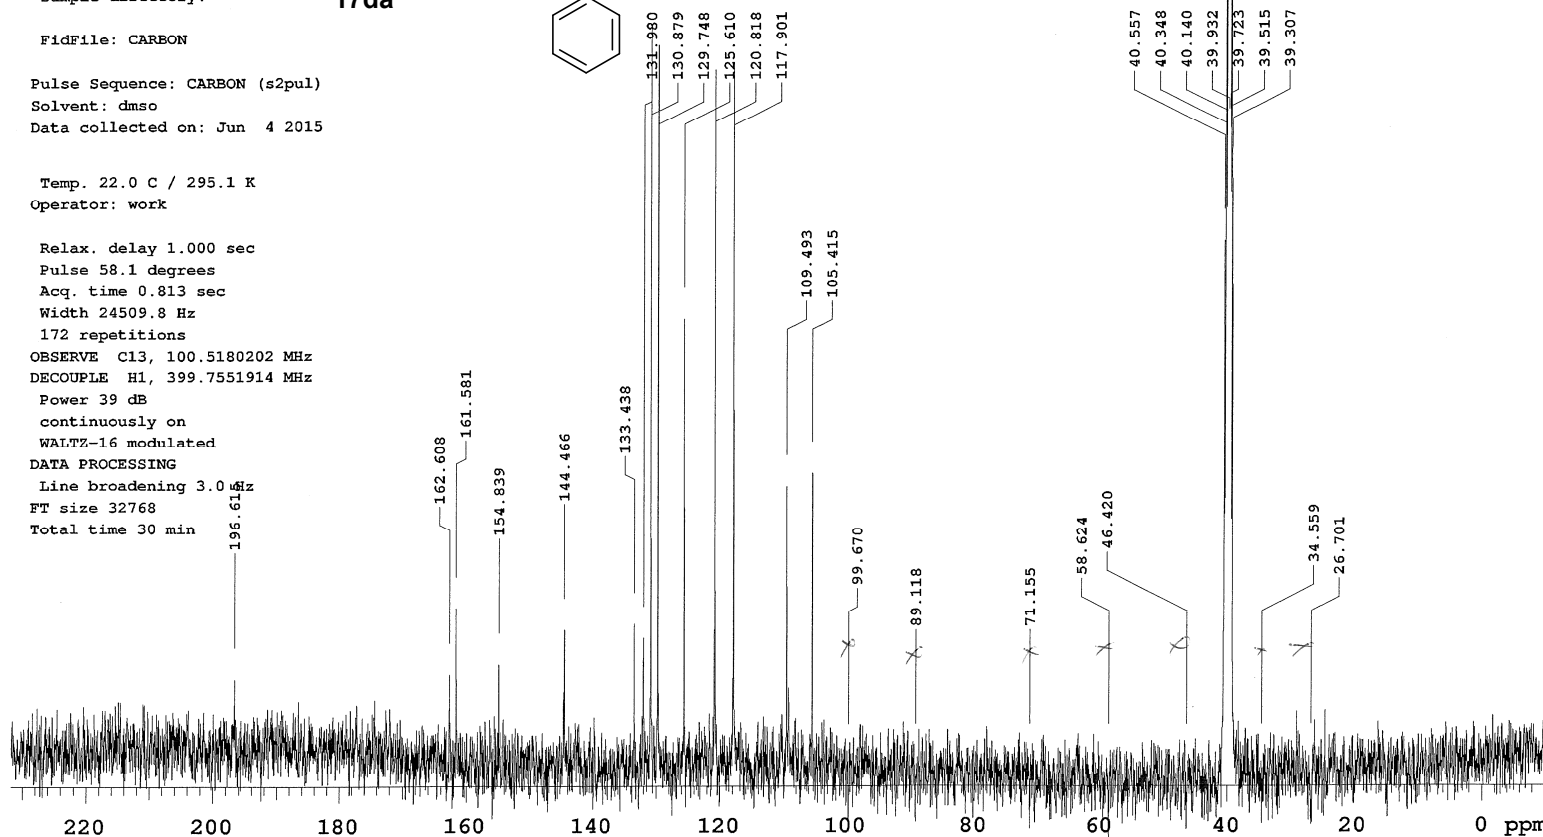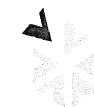

VARIAN



new experiment

Sample Name:

Data Collected on:  
400mr-vnmrs400

Archive directory:

Sample directory:

FidFile: PROTON

Pulse Sequence: PROTON (s2pul)  
Solvent: cdcl3  
Data collected on: Sep 9 2013

Temp. 26.0 C / 299.1 K  
Operator: work

Relax. delay 2.000 sec  
Pulse 45.0 degrees  
Acq. time 1.278 sec  
Width 6410.3 Hz  
16 repetitions  
OBSERVE H1, 399.7512862 MHz  
DATA PROCESSING  
Line broadening 0.5 Hz  
FT size 16384  
Total time 0 min 52 sec

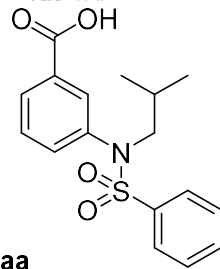

22aa

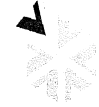

VARIAN

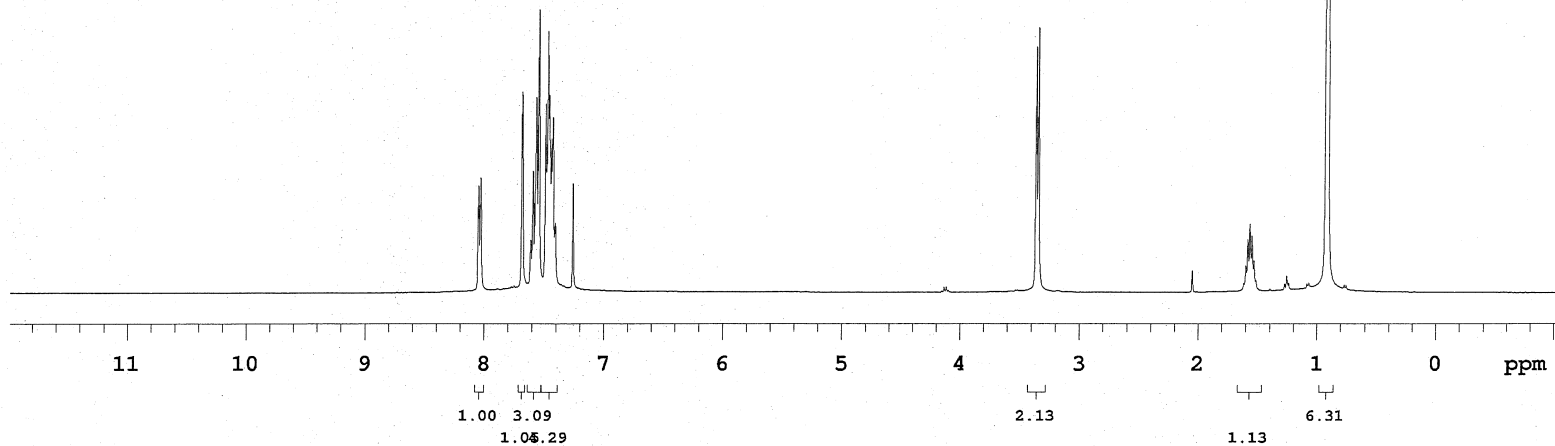

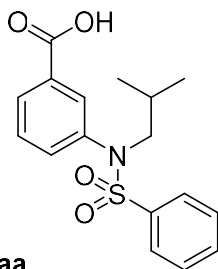

Sample Name:

Data Collected on:  
400mr-vnmrs400

Archive directory: **22aa**

Sample directory:

FidFile: CARBON

Pulse Sequence: CARBON (s2pul)  
Solvent: cdcl3  
Data collected on: Sep 9 2013

Temp. 26.0 C / 299.1 K  
Operator: work

Relax. delay 1.000 sec  
Pulse 45.0 degrees  
Acq. time 1.285 sec  
Width 25510.2 Hz  
108 repetitions  
OBSERVE C13, 100.5175428 MHz  
DECOUPLE H1, 399.7532925 MHz  
Power 39 dB  
continuously on  
WALTZ-16 modulated  
DATA PROCESSING  
Line broadening 0.5 Hz  
FT size 65536  
Total time 5 hr, 42 min

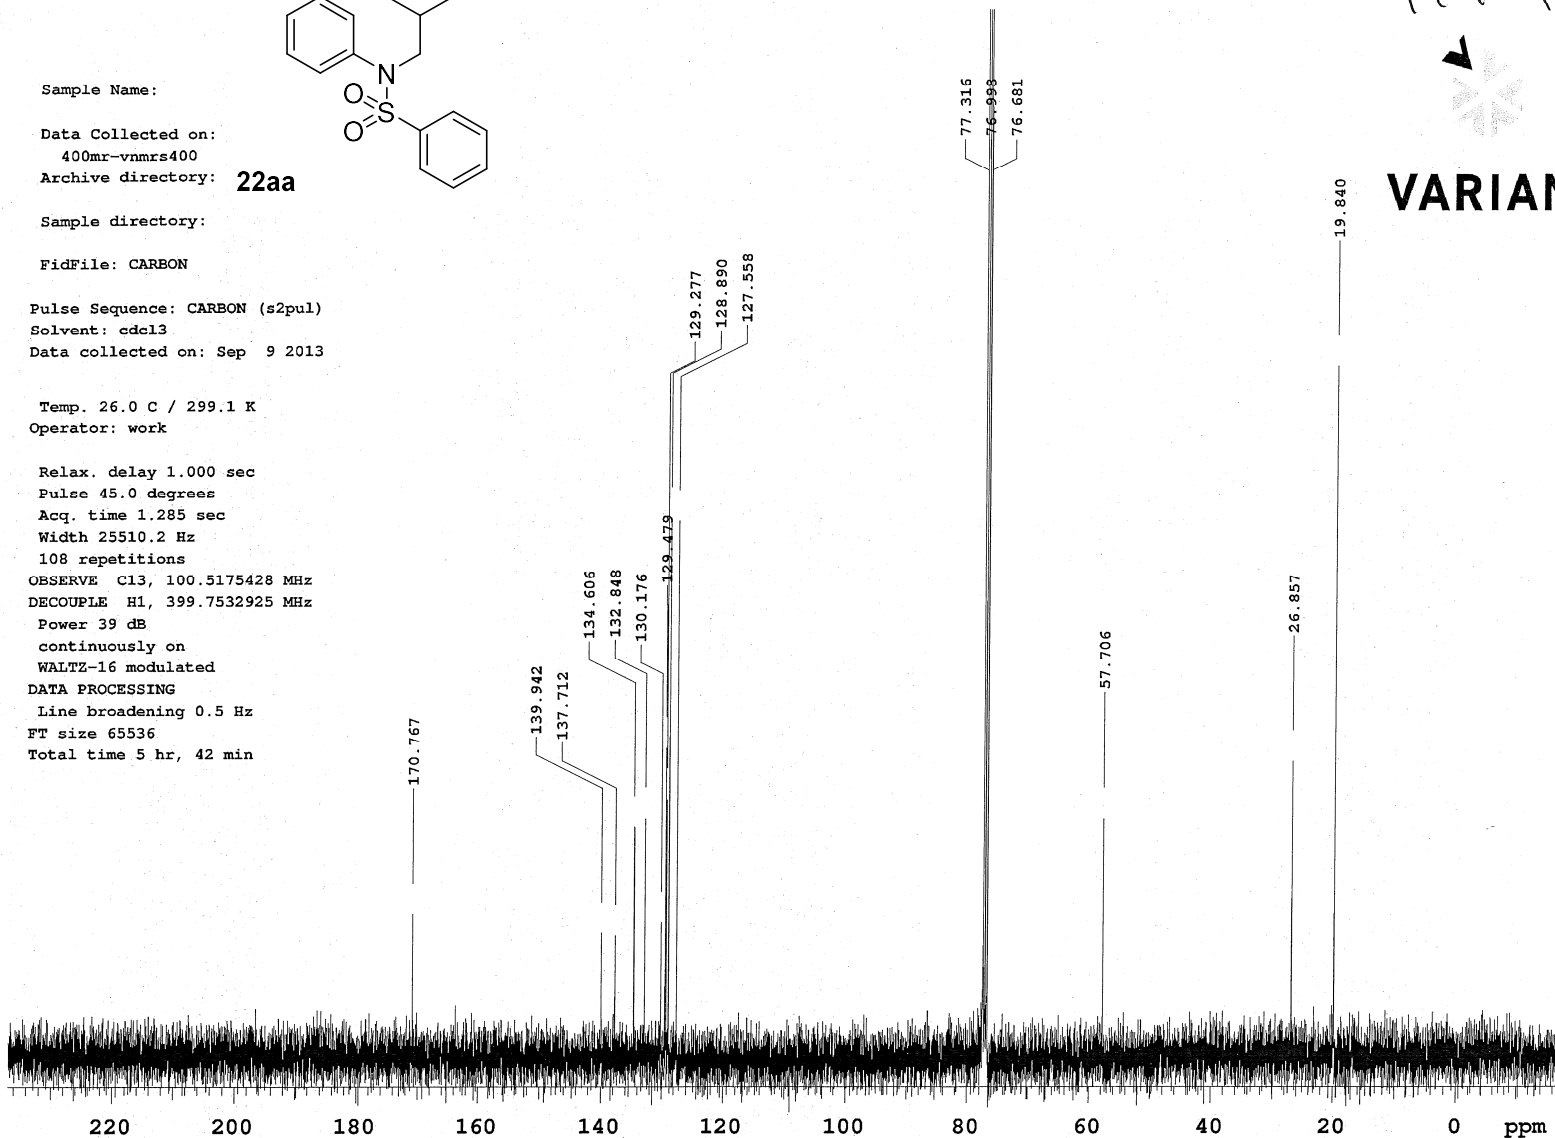

**VARIAN**

new experiment

Sample Name:

Data Collected on:  
400mr-vnmrs400

Archive directory: **22ab**

Sample directory:

FidFile: PROTON

Pulse Sequence: PROTON (s2pul)  
Solvent: cdcl3  
Data collected on: Sep 9 2013

Temp. 26.0 C / 299.1 K  
Operator: work

Relax. delay 2.000 sec  
Pulse 45.0 degrees  
Acq. time 1.278 sec  
Width 6410.3 Hz  
16 repetitions  
OBSERVE H1, 399.7512862 MHz  
DATA PROCESSING  
Line broadening 0.5 Hz  
FT size 16384  
Total time 0 min 52 sec

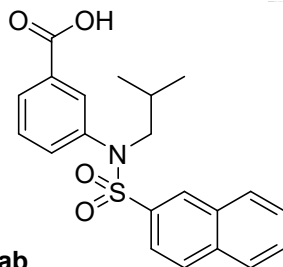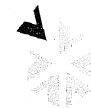

**VARIAN**

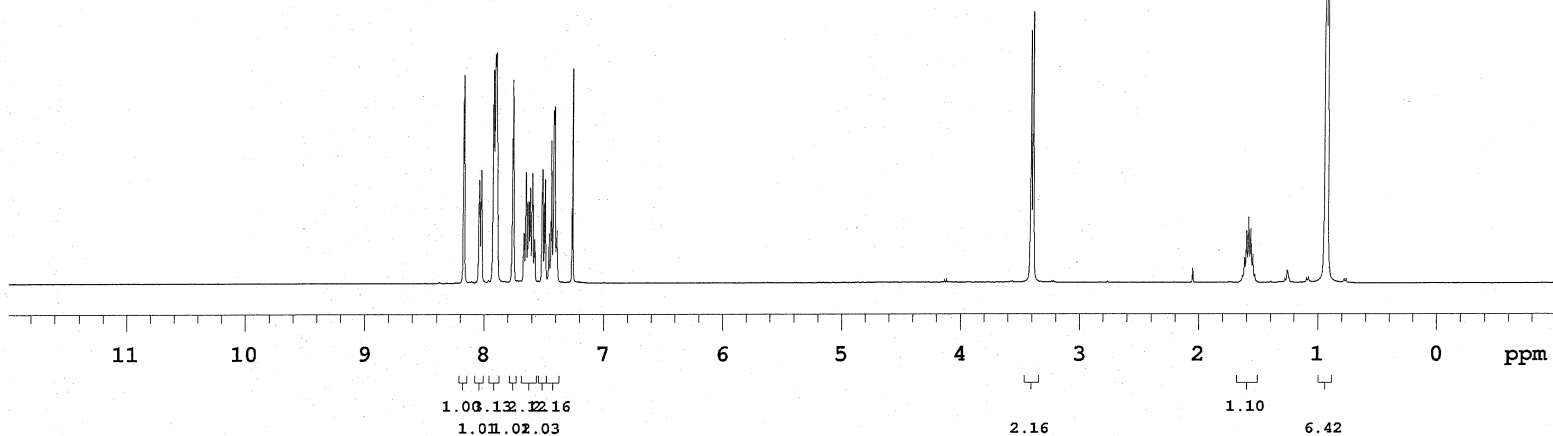

Sample Name:

Data Collected on:

400mr-vnmrs400

Archive directory:

Sample directory:

FidFile: CARBON

Pulse Sequence: CARBON (s2pul)

Solvent: cdcl3

Data collected on: Sep 9 2013

Temp. 26.0 C / 299.1 K

Operator: work

Relax. delay 1.000 sec

Pulse 45.0 degrees

Acq. time 1.285 sec

Width 25510.2 Hz

72 repetitions

OBSERVE C13, 100.5175428 MHz

DECOUPLE H1, 399.7532925 MHz

Power 39 dB

continuously on

WALTZ-16 modulated

DATA PROCESSING

Line broadening 0.5 Hz

FT size 65536

Total time 5 hr, 42 min

22ab

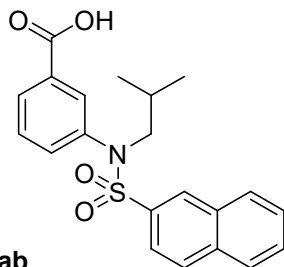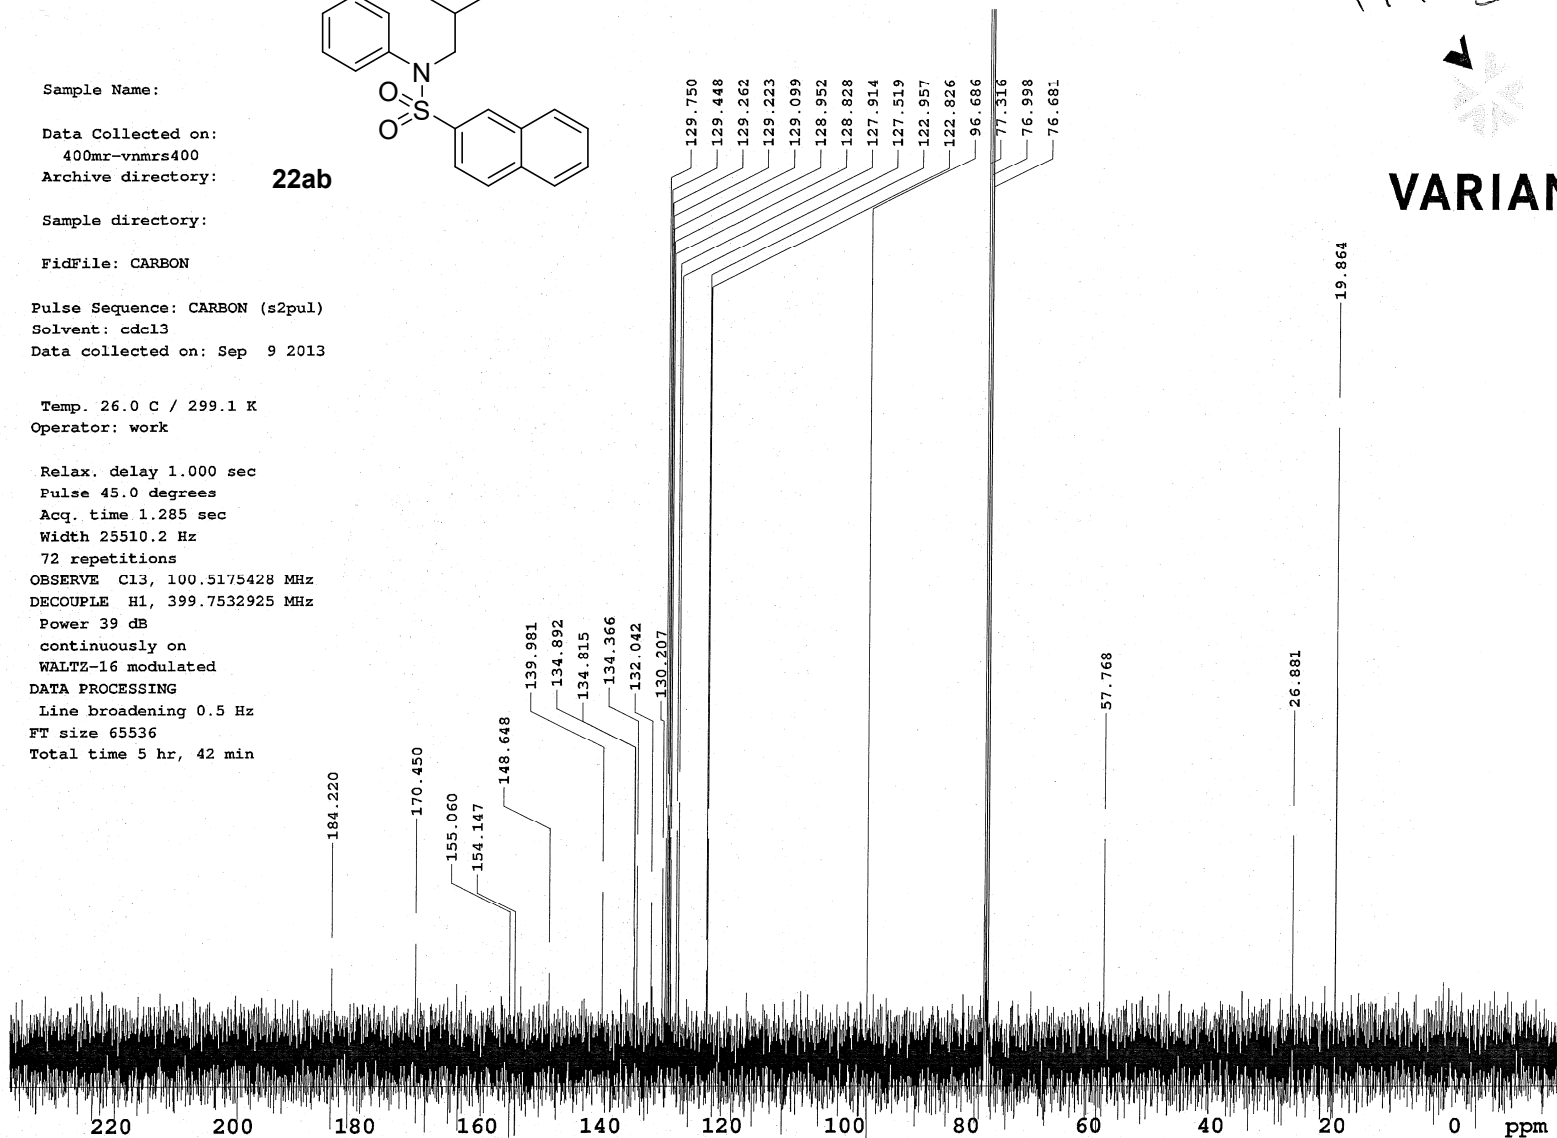

VARIAN

new experiment

Sample Name:

Data Collected on:  
400mr-vnmrs400

Archive directory:

Sample directory:

FidFile: PROTON

Pulse Sequence: PROTON (s2pul)  
Solvent: cdcl3  
Data collected on: Sep 9 2013

Temp. 26.0 C / 299.1 K  
Operator: work

Relax. delay 2.000 sec  
Pulse 45.0 degrees  
Acq. time 1.278 sec  
Width 6410.3 Hz  
16 repetitions  
OBSERVE H1, 399.7512862 MHz  
DATA PROCESSING  
Line broadening 0.5 Hz  
FT size 16384  
Total time 0 min 52 sec

22ac

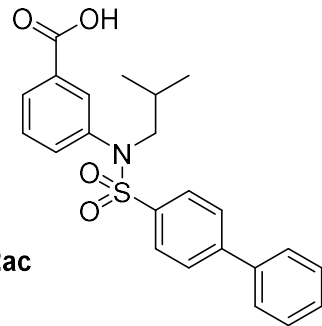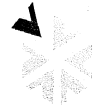

VARIAN

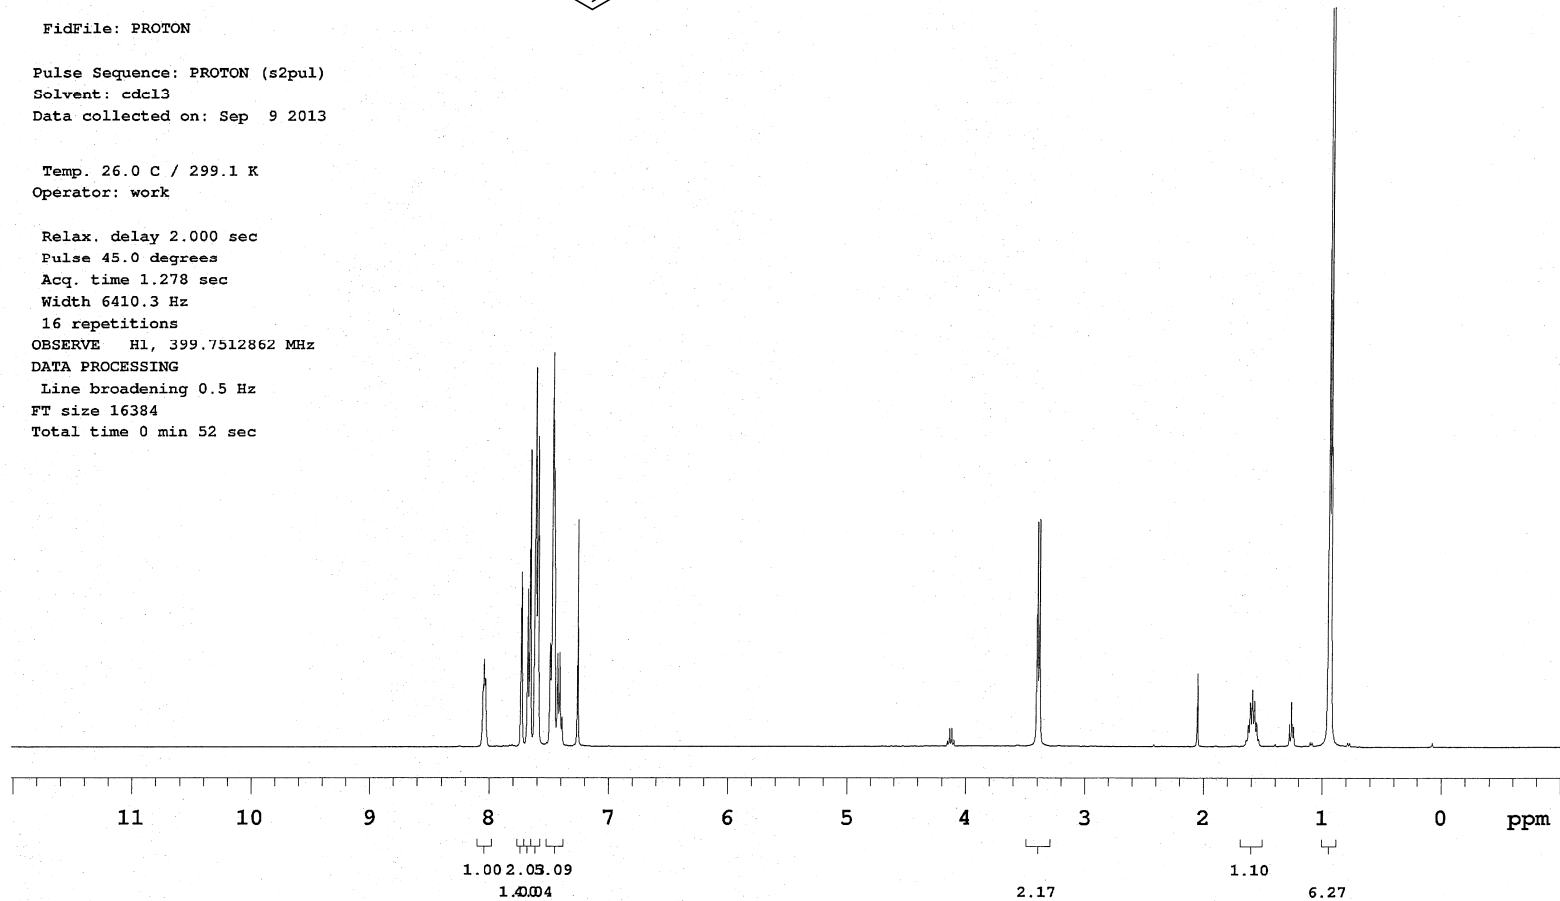

Sample Name:

Data Collected on:  
400mr-vnmrs400  
Archive directory:

Sample directory:

FidFile: CARBON

Pulse Sequence: CARBON (s2pul)  
Solvent: cdcl3  
Data collected on: Sep 9 2013

Temp. 26.0 C / 299.1 K  
Operator: work

Relax. delay 1.000 sec  
Pulse 45.0 degrees  
Acq. time 1.285 sec  
Width 25510.2 Hz  
60 repetitions  
OBSERVE C13, 100.5175428 MHz  
DECOUPLE H1, 399.7532925 MHz

Power 39 dB  
continuously on  
WALTZ-16 modulated  
DATA PROCESSING  
Line broadening 0.5 Hz  
FT size 65536  
Total time 5 hr, 42 min

22ac

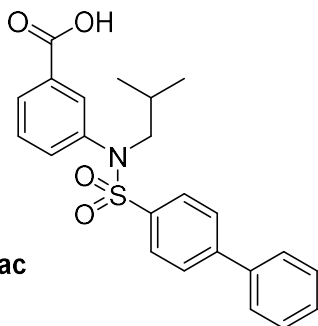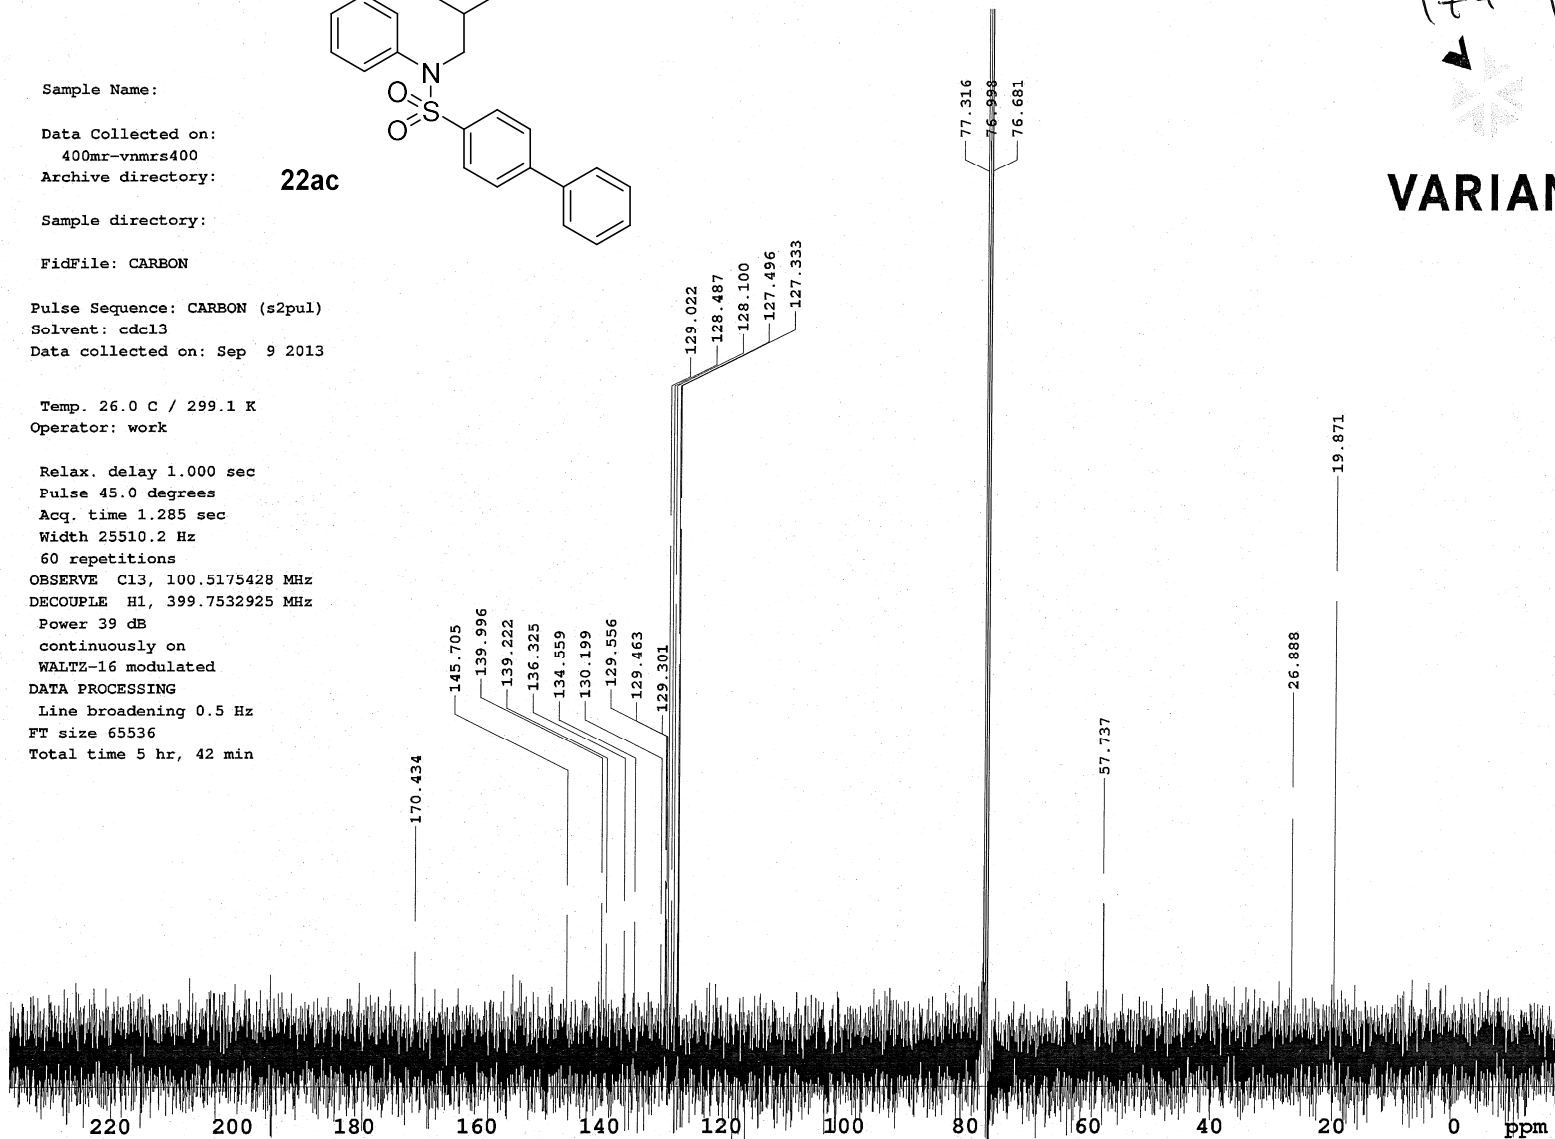

VARIAN

177-6

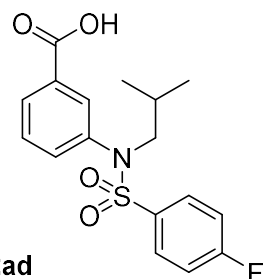

22ad

new experiment

Sample Name:

Data Collected on:

400mr-vnmrs400

Archive directory:

Sample directory:

FidFile: PROTON

Pulse Sequence: PROTON (s2pul)

Solvent: cdcl3

Data collected on: Nov 6 2015

Operator: work

Relax. delay 3.000 sec

Pulse 79.4 degrees

Acq. time 1.278 sec

Width 6410.3 Hz

16 repetitions

OBSERVE H1, 399.7512853 MHz

DATA PROCESSING

Line broadening 0.5 Hz

FT size 16384

Total time 1 min 8 sec

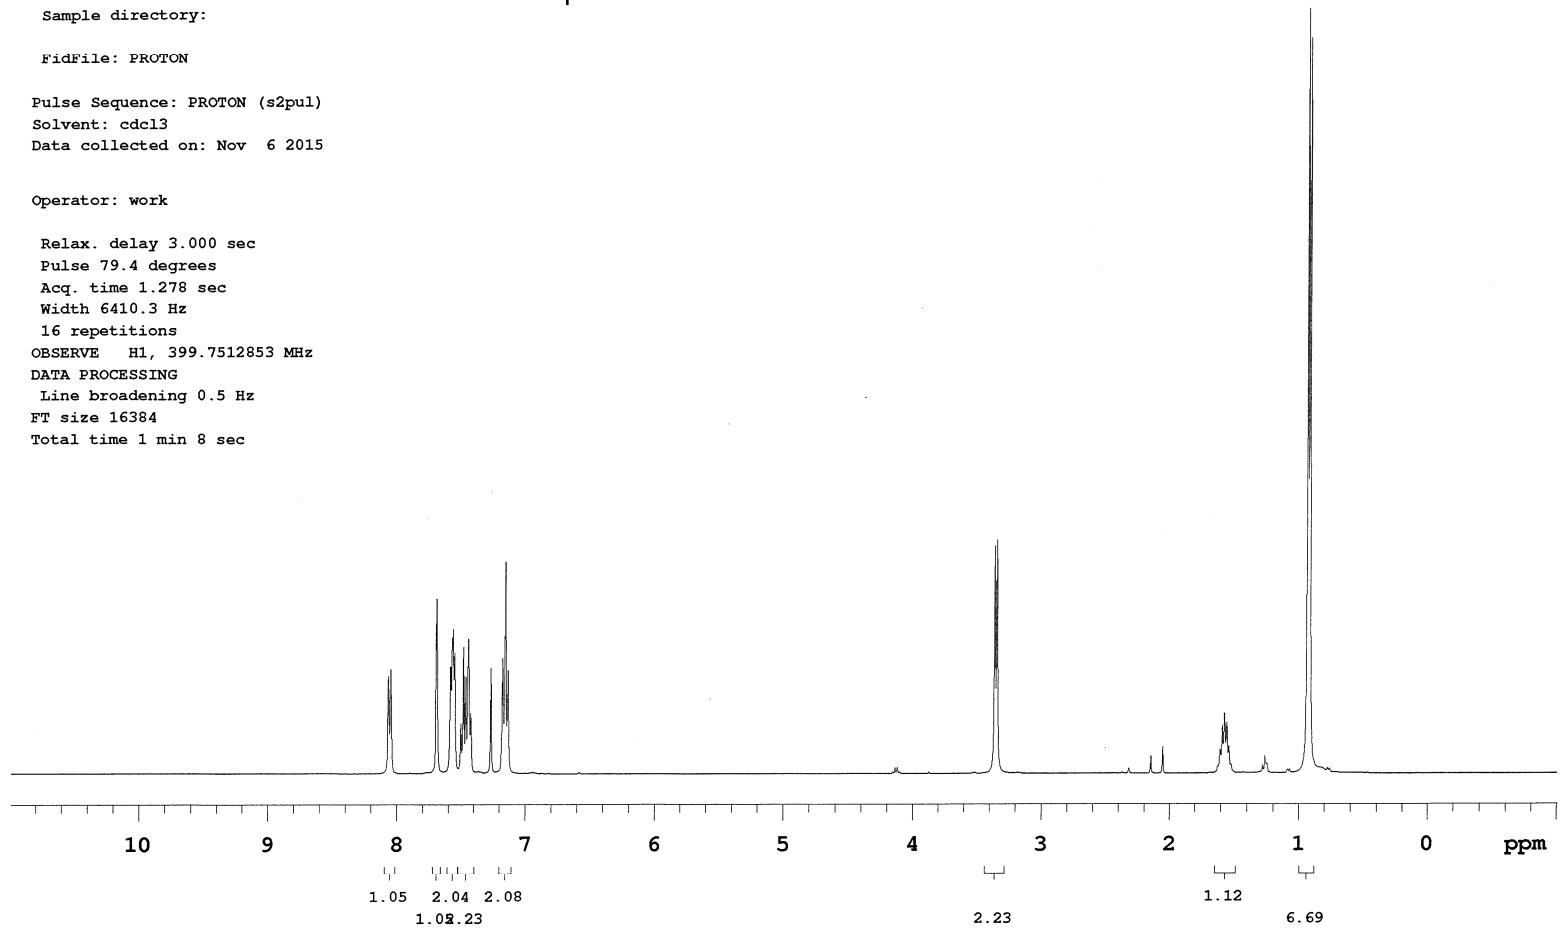

177-6

RR\_1005A-C13

Sample Name:

Data Collected on:

400mr-vnmrs400

Archive directory:

Sample directory:

FidFile: CARBON

Pulse Sequence: CARBON (s2pul)

Solvent: cdcl3

Data collected on: Nov 6 2015

Operator: work

Relax. delay 1.000 sec

Pulse 58.1 degrees

Acq. time 0.813 sec

Width 24509.8 Hz

96 repetitions

OBSERVE C13, 100.5175428 MHz

DECOUPLE H1, 399.7532925 MHz

Power 39 dB

continuously on

WALTZ-16 modulated

DATA PROCESSING

Line broadening 3.0 Hz

FT size 32768

Total time 4 hr, 31 min

22ad

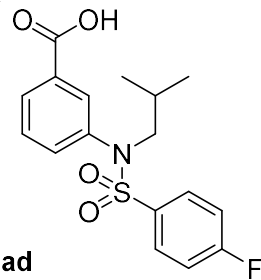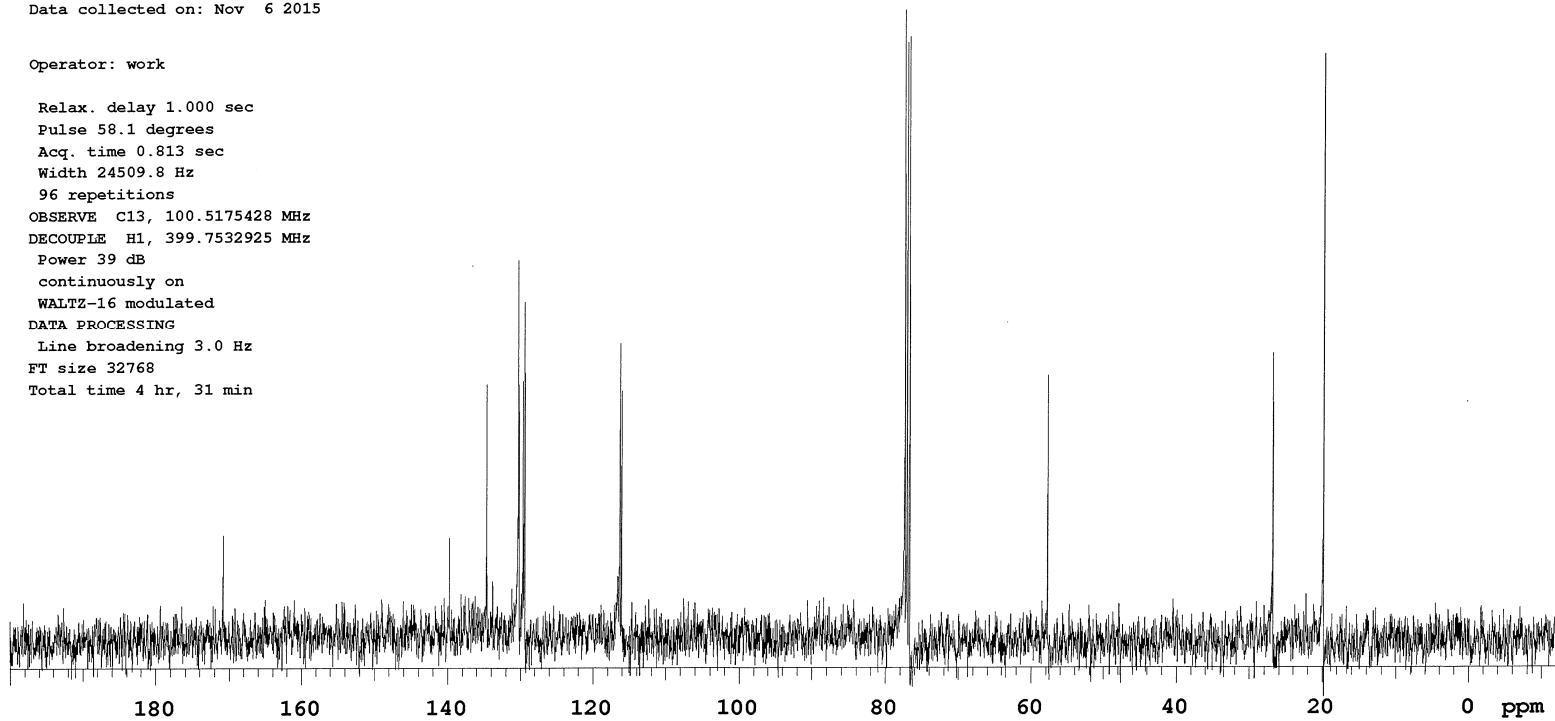



new experiment

Sample Name:

Data Collected on:  
400mr-vnmrs400

Archive directory:

Sample directory:

FidFile: PROTON

Pulse Sequence: PROTON (s2pul)  
Solvent: cdcl3  
Data collected on: Sep 9 2013

Temp. 26.0 C / 299.1 K  
Operator: work

Relax. delay 2.000 sec  
Pulse 45.0 degrees  
Acq. time 1.278 sec  
Width 6410.3 Hz  
16 repetitions  
OBSERVE H1, 399.7512862 MHz  
DATA PROCESSING  
Line broadening 0.5 Hz  
FT size 16384  
Total time 0 min 52 sec

22ae

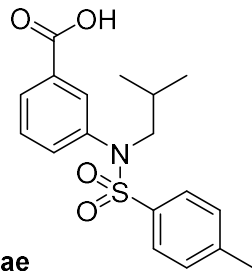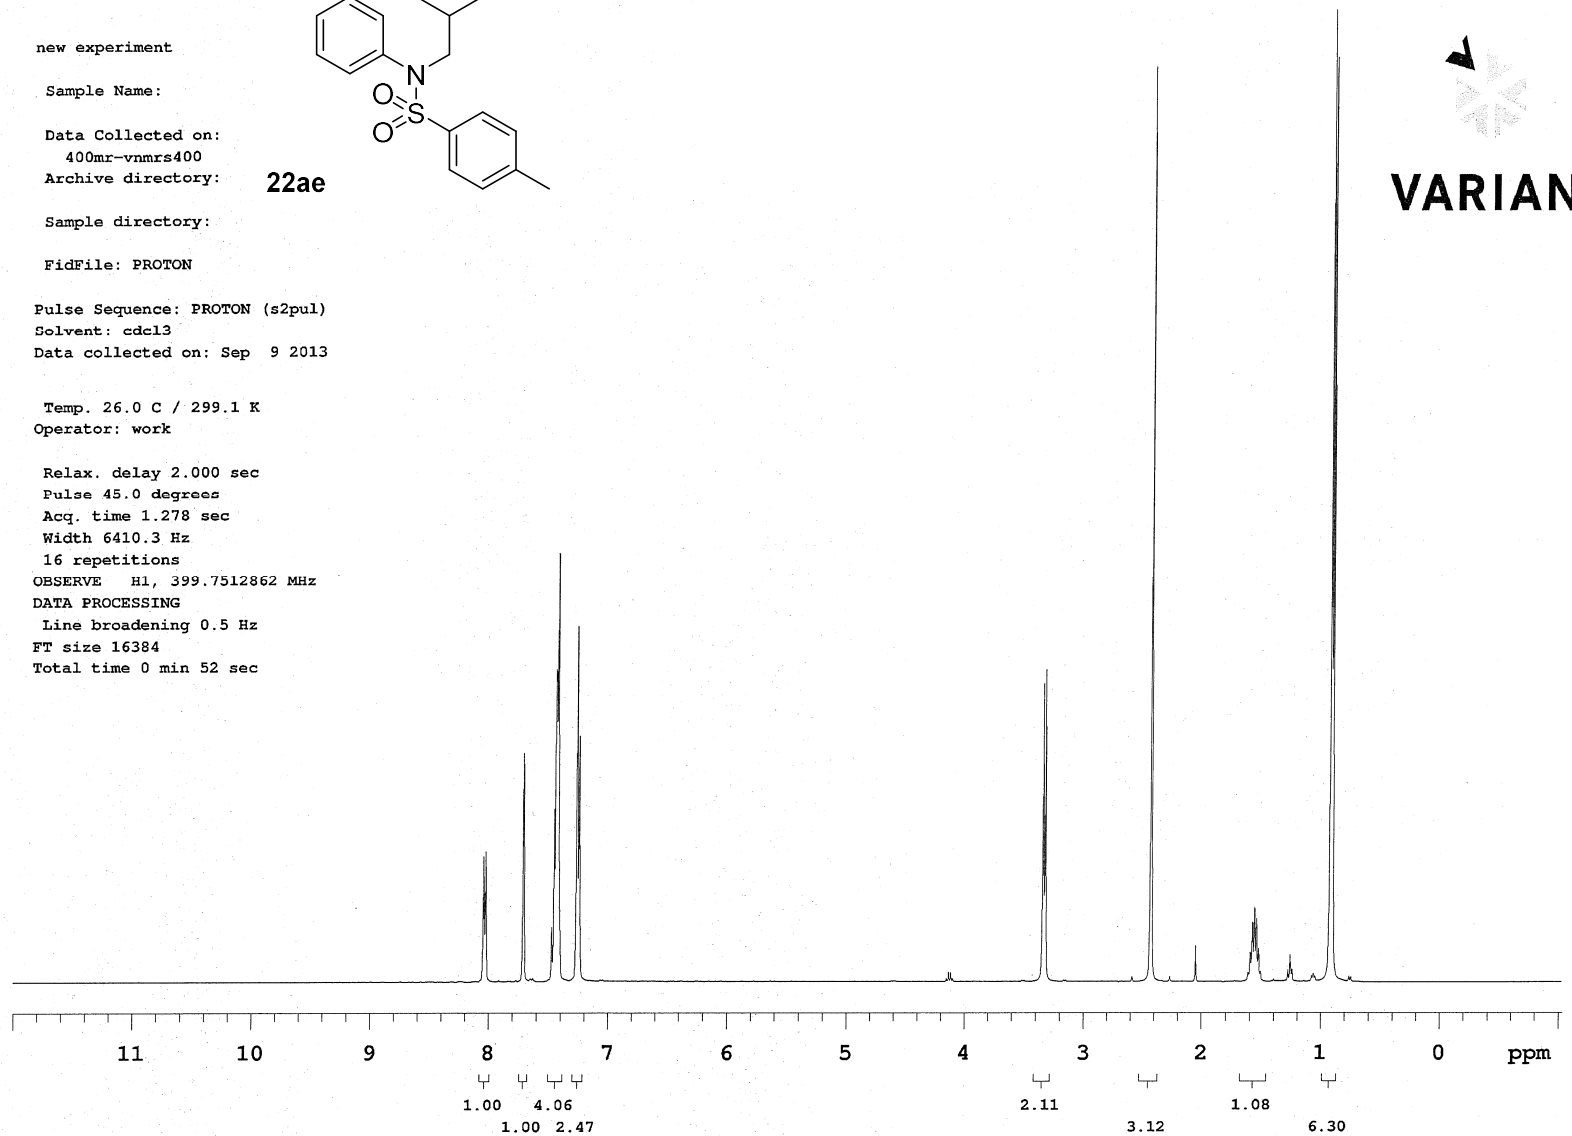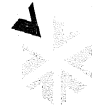

VARIAN

Sample Name:

Data Collected on:  
400mr-vnmrs400

Archive directory:

Sample directory:

FidFile: CARBON

Pulse Sequence: CARBON (s2pul)  
Solvent: cdcl3  
Data collected on: Sep 9 2013

Temp. 26.0 C / 299.1 K  
Operator: work

Relax. delay 1.000 sec  
Pulse 45.0 degrees  
Acq. time 1.285 sec  
Width 25510.2 Hz  
76 repetitions

OBSERVE C13, 100.5175428 MHz  
DECOUPLE H1, 399.7532925 MHz

Power 39 dB  
continuously on  
WALTZ-16 modulated

DATA PROCESSING  
Line broadening 0.5 Hz  
FT size 65536  
Total time 5 hr, 42 min

22ae

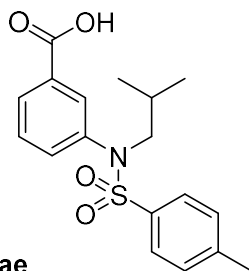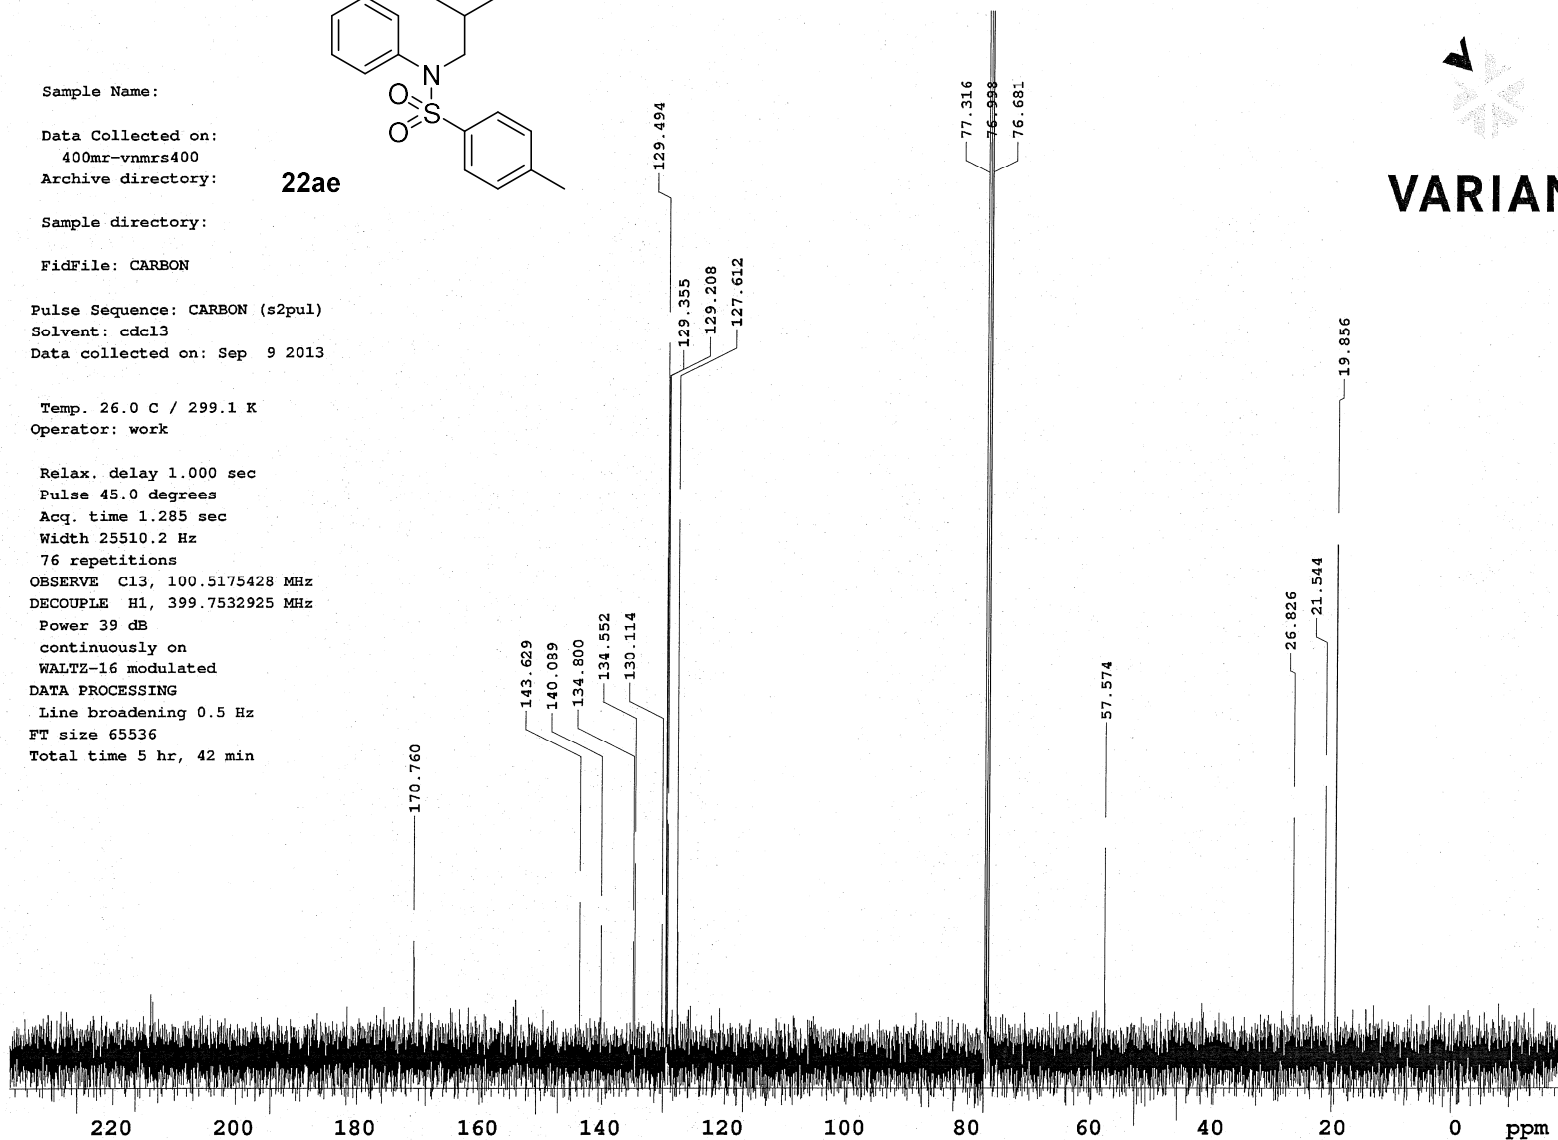

177-5

new experiment

Sample Name:

Data Collected on:  
400mr-vnmrs400

Archive directory:

Sample directory:

FidFile: PROTON

Pulse Sequence: PROTON (s2pul)  
Solvent: cdcl3  
Data collected on: Nov 6 2015

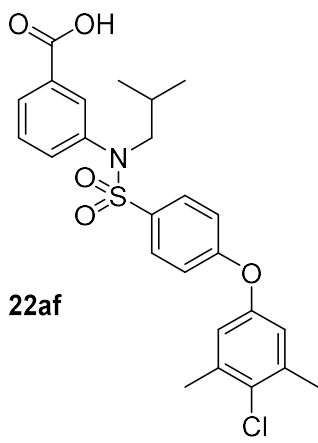

Operator: work

Relax. delay 3.000 sec  
Pulse 79.4 degrees  
Acq. time 1.278 sec  
Width 6410.3 Hz  
16 repetitions  
OBSERVE H1, 399.7512853 MHz  
DATA PROCESSING  
Line broadening 0.5 Hz  
FT size 16384  
Total time 1 min 8 sec

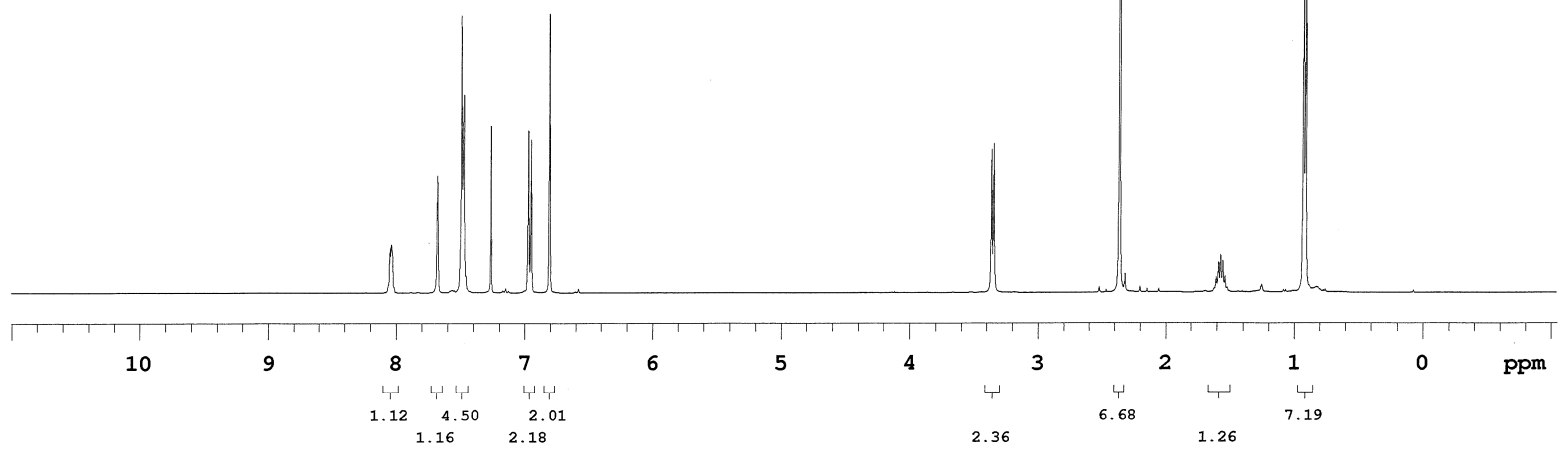

177-5

RR\_1005A-C13

Sample Name:

Data Collected on:  
400mr-vnmrs400

Archive directory:

Sample directory:

FidFile: CARBON

Pulse Sequence: CARBON (s2pul)  
Solvent: cdcl3  
Data collected on: Nov 6 2015

Operator: work

Relax. delay 1.000 sec  
Pulse 58.1 degrees  
Acq. time 0.813 sec  
Width 24509.8 Hz  
252 repetitions  
OBSERVE C13, 100.5175428 MHz  
DECOUPLE H1, 399.7532925 MHz  
Power 39 dB  
continuously on  
WALTZ-16 modulated  
DATA PROCESSING  
Line broadening 3.0 Hz  
FT size 32768  
Total time 4 hr, 31 min

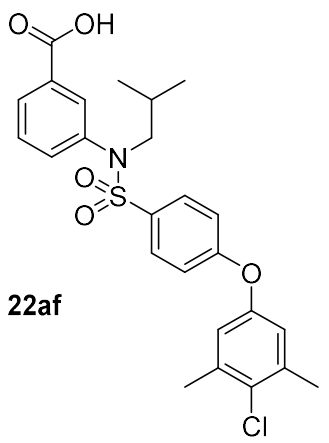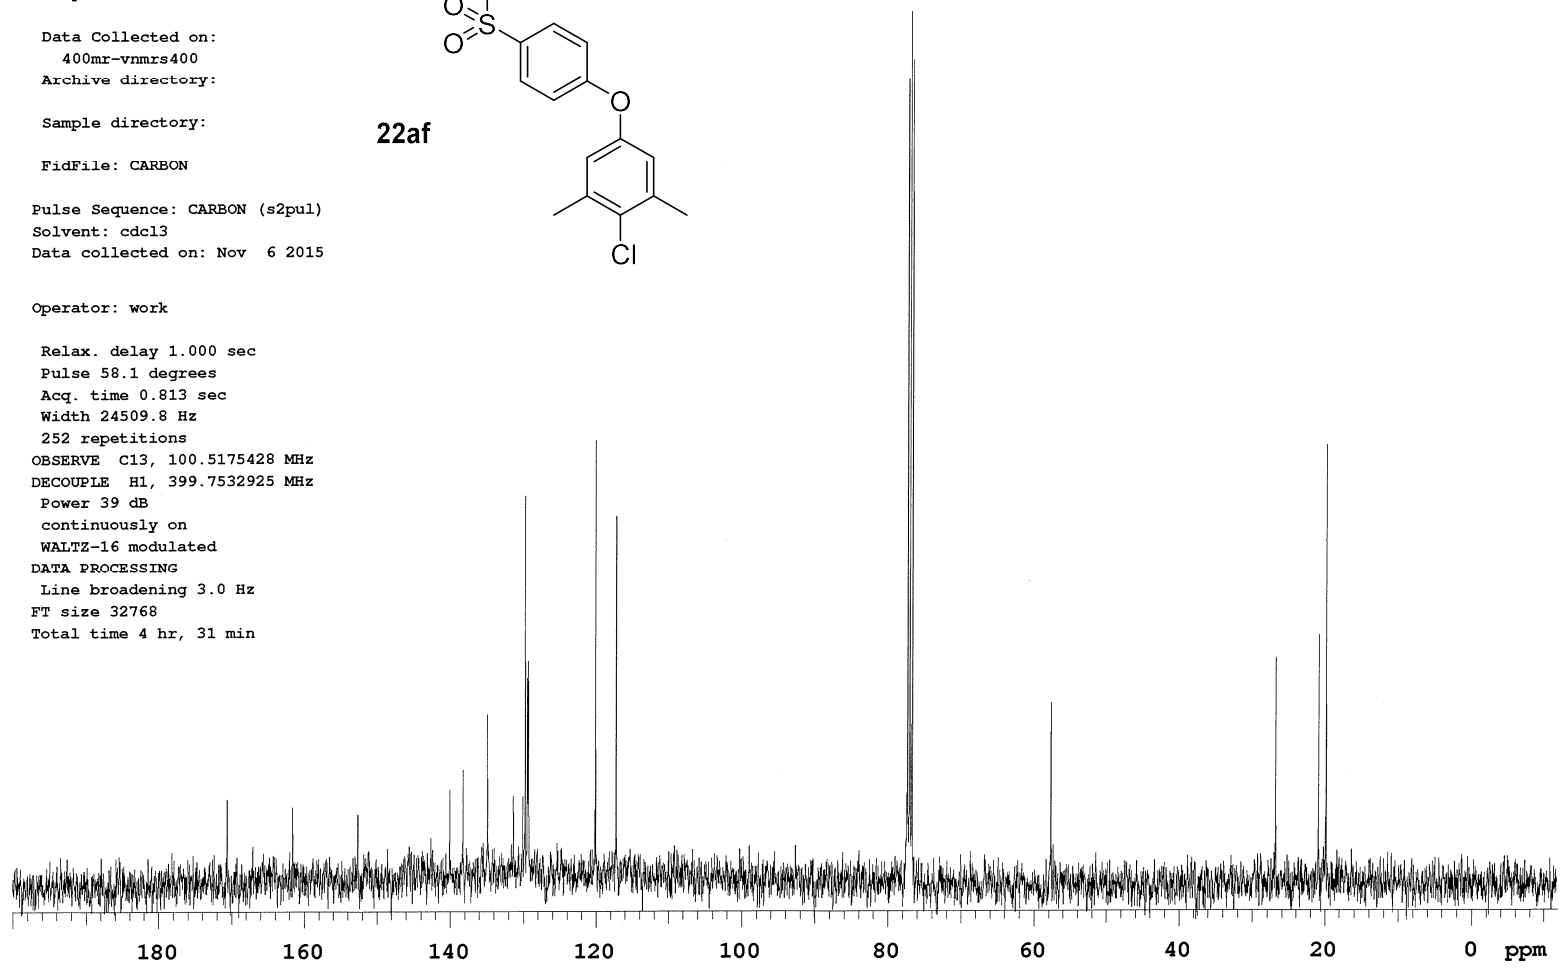

Sample Name:  
 jy-5-296p-cdcl3  
 Data Collected on:  
 400mr-vnmrs400  
 Archive directory:

Sample directory:

FidFile: PROTON

Pulse Sequence: PROTON (s2pul)  
 Solvent: cdcl3  
 Data collected on: Sep 24 2013

Temp. 26.0 C / 299.1 K  
 Operator: work

Relax. delay 1.000 sec  
 Pulse 45.0 degrees  
 Acq. time 1.278 sec  
 Width 6410.3 Hz  
 16 repetitions  
 OBSERVE H1, 399.7512838 MHz  
 DATA PROCESSING  
 Line broadening 0.5 Hz  
 FT size 16384  
 Total time 0 min 36 sec

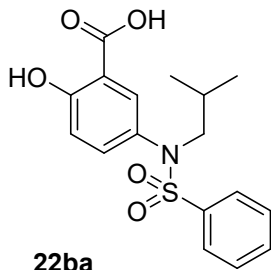

22ba

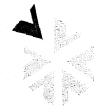

VARIAN

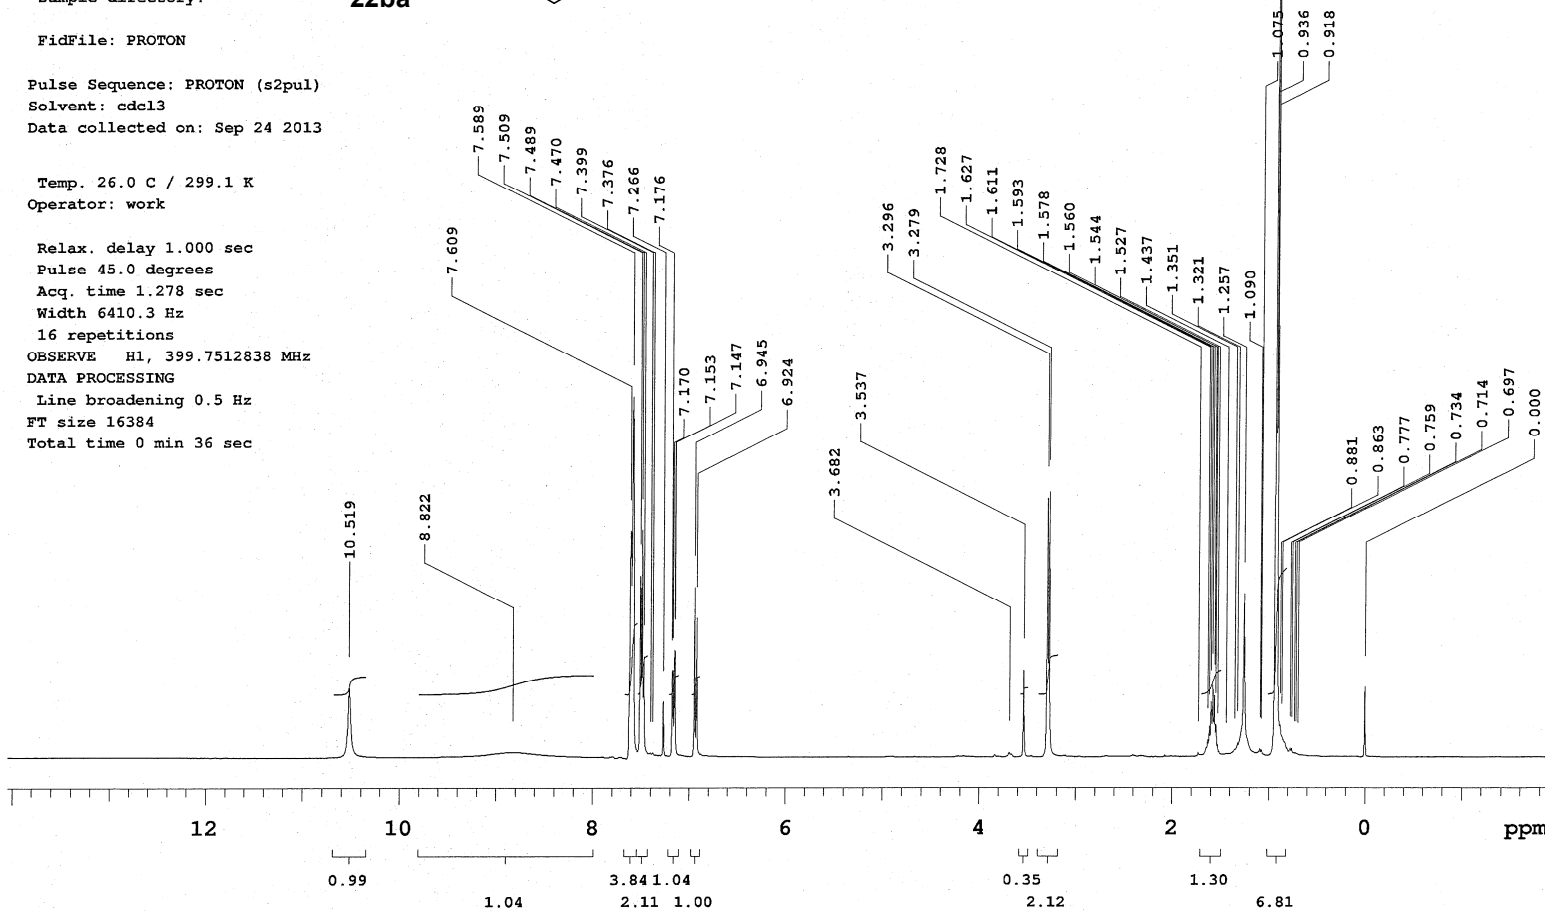

Sample Name:  
jy-5-296p-c13-cdcl3  
Data Collected on:  
400mr-vnmrs400  
Archive directory:

Sample directory:

FidFile: CARBON

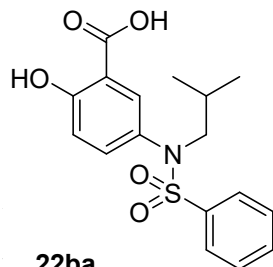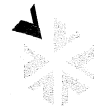

VARIAN

Pulse Sequence: CARBON (s2pul)  
Solvent: cdcl3  
Data collected on: Sep 24 2013

Temp. 26.0 C / 299.1 K  
Operator: work

Relax. delay 1.000 sec  
Pulse 58.1 degrees  
Acq. time 0.813 sec  
Width 25510.2 Hz  
250 repetitions  
OBSERVE C13, 100.5175428 MHz  
DECOUPLE H1, 399.7532925 MHz  
Power 39 dB  
continuously on  
WALTZ-16 modulated  
DATA PROCESSING  
Line broadening 3.0 Hz  
FT size 32768  
Total time 7 min 33 sec

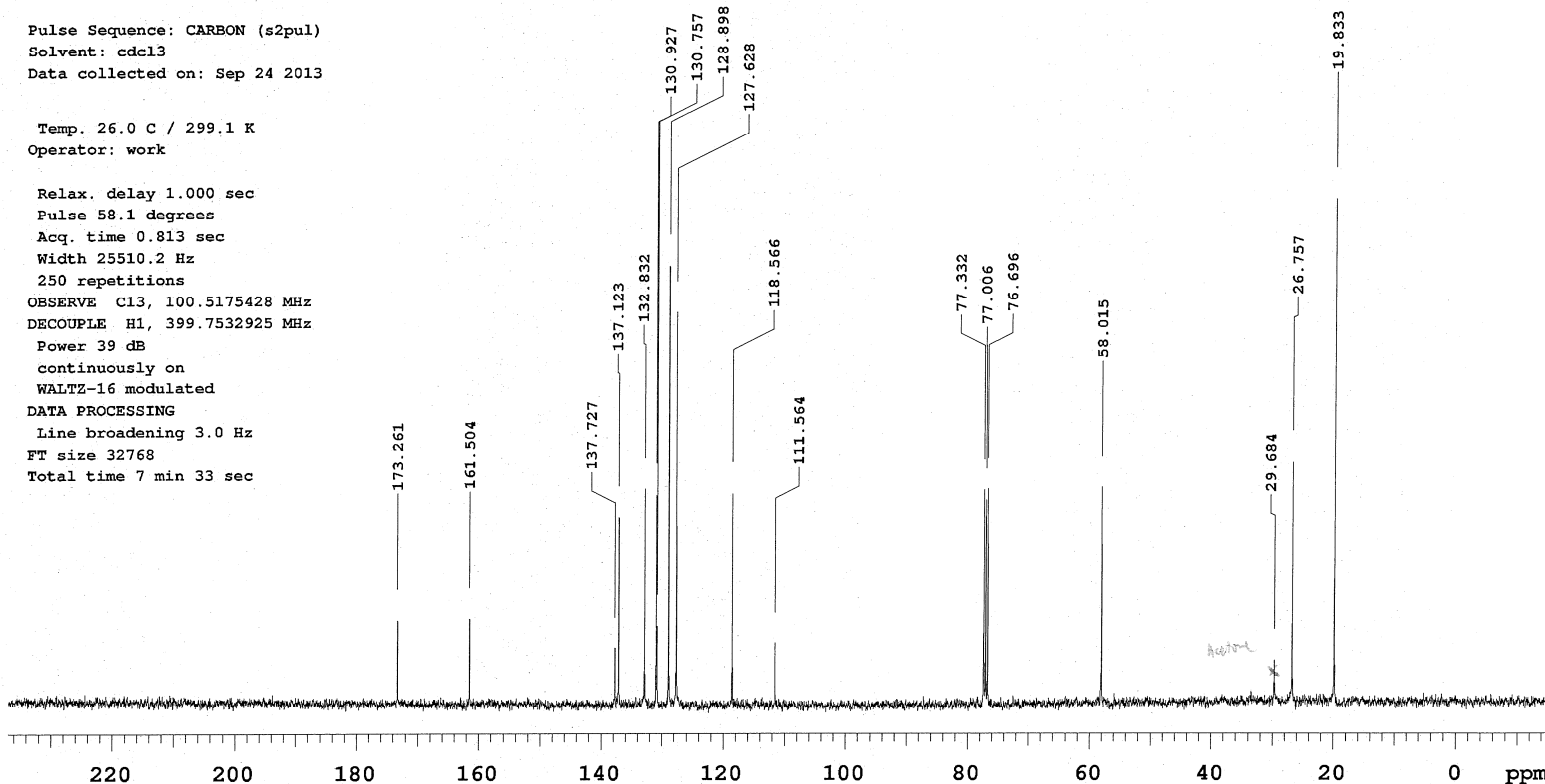

Sample Name:  
jy-5-299p-cdcl3  
Data Collected on:  
400mr-vnmrs400  
Archive directory:

Sample directory:

FidFile: PROTON

Pulse Sequence: PROTON (s2pul)  
Solvent: cdcl3  
Data collected on: Oct 1 2016

Temp. 26.0 C / 299.1 K  
Operator: work

Relax. delay 1.000 sec  
Pulse 45.0 degrees  
Acq. time 2.556 sec  
Width 6410.3 Hz  
16 repetitions  
OBSERVE H1, 399.7512875 MHz  
DATA PROCESSING  
FT size 32768  
Total time 0 min 57 sec

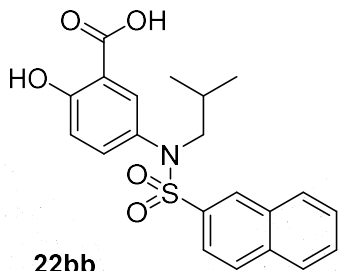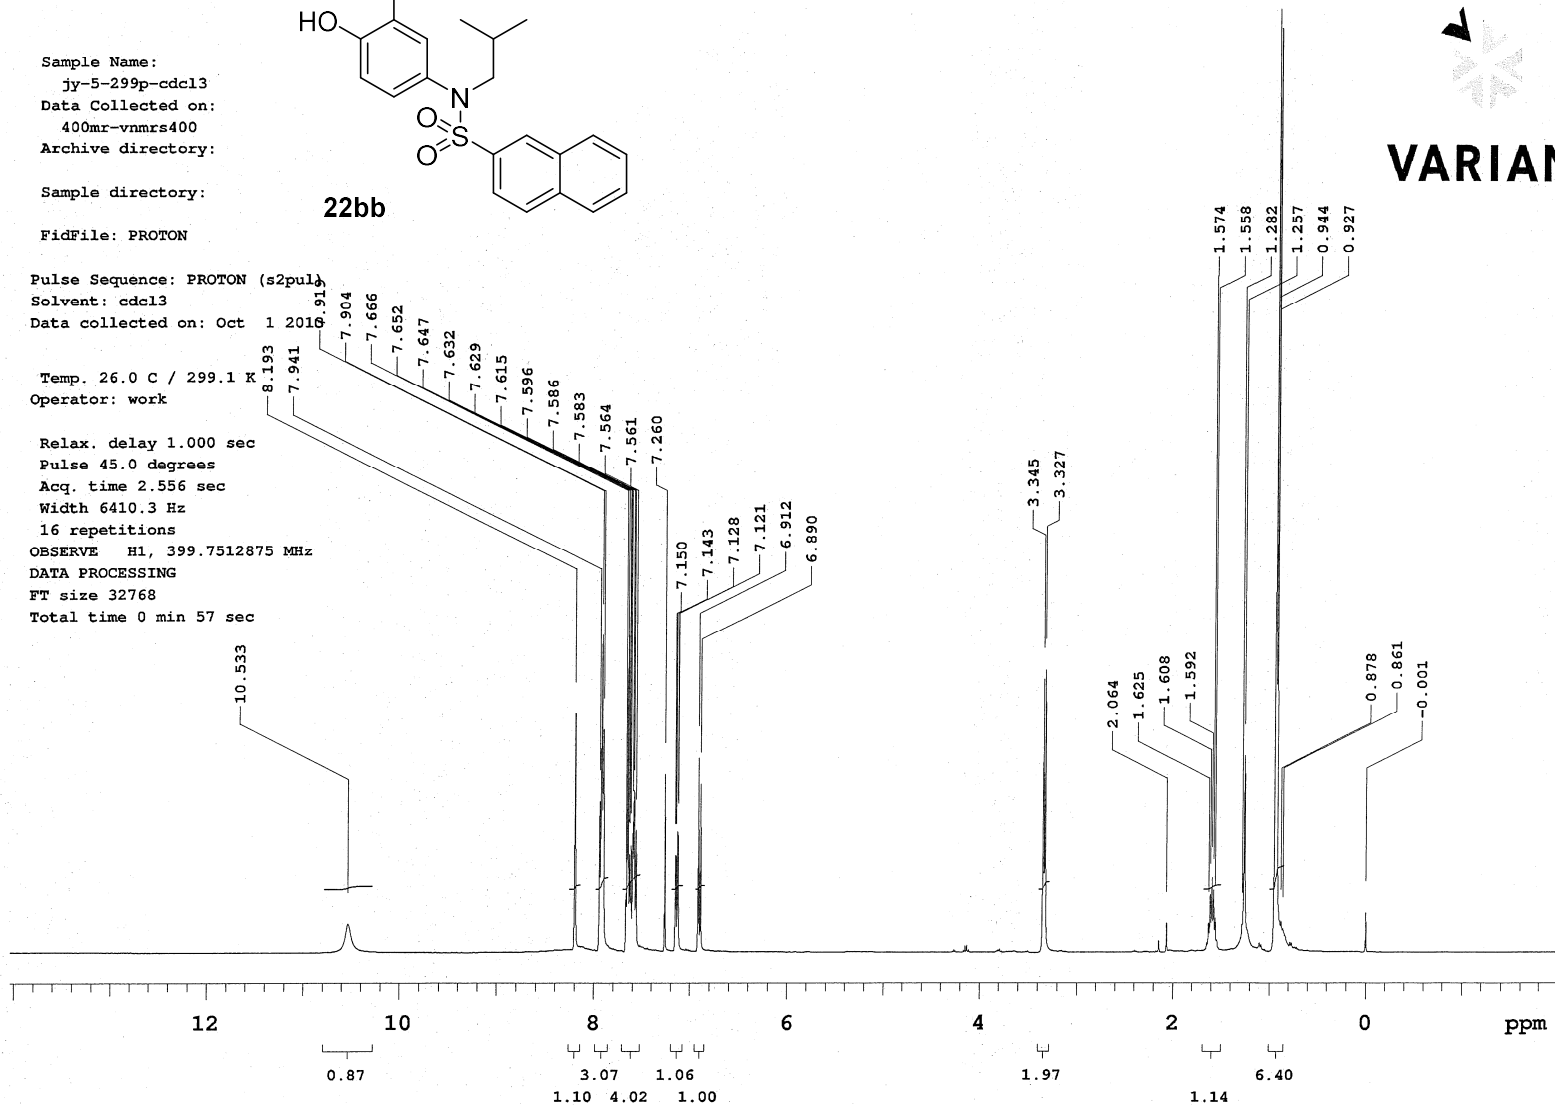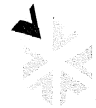

VARIAN

Sample Name:  
jy-5-299p-cdcl3  
Data Collected on:  
400mr-vnmrs400  
Archive directory:

Sample directory:

FidFile: CARBON

Pulse Sequence: CARBON (s2pul)  
Solvent: cdcl3  
Data collected on: Oct 1 2013

Temp. 26.0 C / 299.1 K  
Operator: work

Relax. delay 1.000 sec  
Pulse 45.0 degrees  
Acq. time 1.285 sec  
Width 25510.2 Hz  
192 repetitions  
OBSERVE C13, 100.5175428 MHz  
DECOUPLE H1, 399.7532925 MHz  
Power 39 dB  
continuously on  
WALTZ-16 modulated  
DATA PROCESSING  
Line broadening 0.5 Hz  
FT size 65536  
Total time 9 min 31 sec

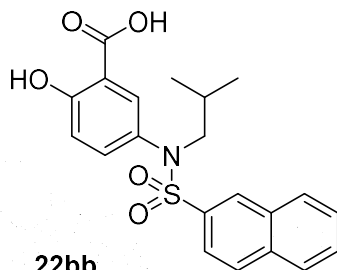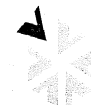

VARIAN

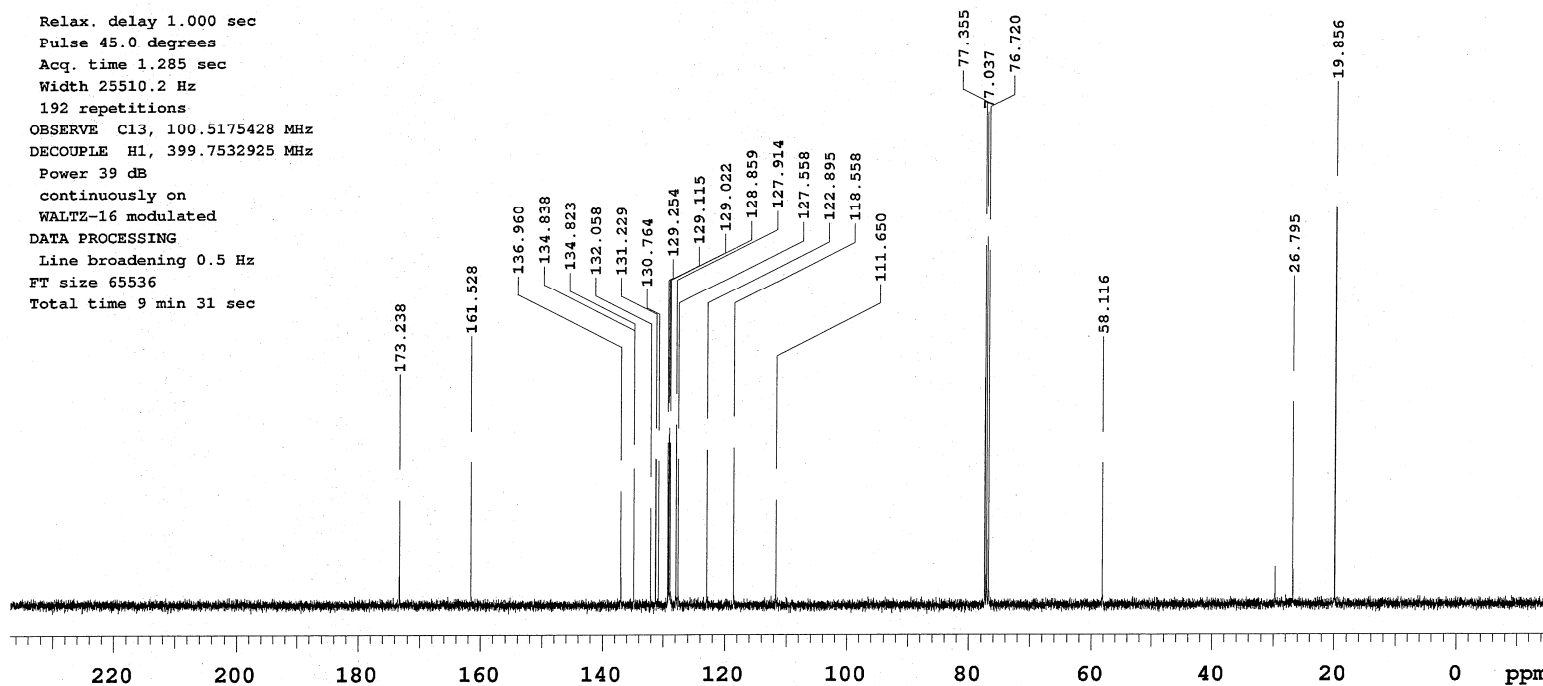



Sample Name:  
jy-5-300p-cdc13  
Data Collected on:  
400mr-vmrs400  
Archive directory:

Sample directory:

FidFile: PROTON

Pulse Sequence: PROTON (s2pul)  
Solvent: cdcl3  
Data collected on: Oct 1 2013

Temp. 26.0 C / 299.1 K  
Operator: work

Relax. delay 1.000 sec  
Pulse 45.0 degrees  
Acq. time 2.556 sec  
Width 6410.3 Hz  
16 repetitions  
OBSERVE H1, 399.7512657 MHz  
DATA PROCESSING  
FT size 32768  
Total time 0 min 57 sec

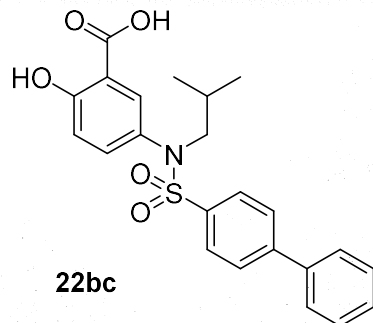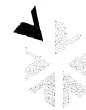

VARIAN

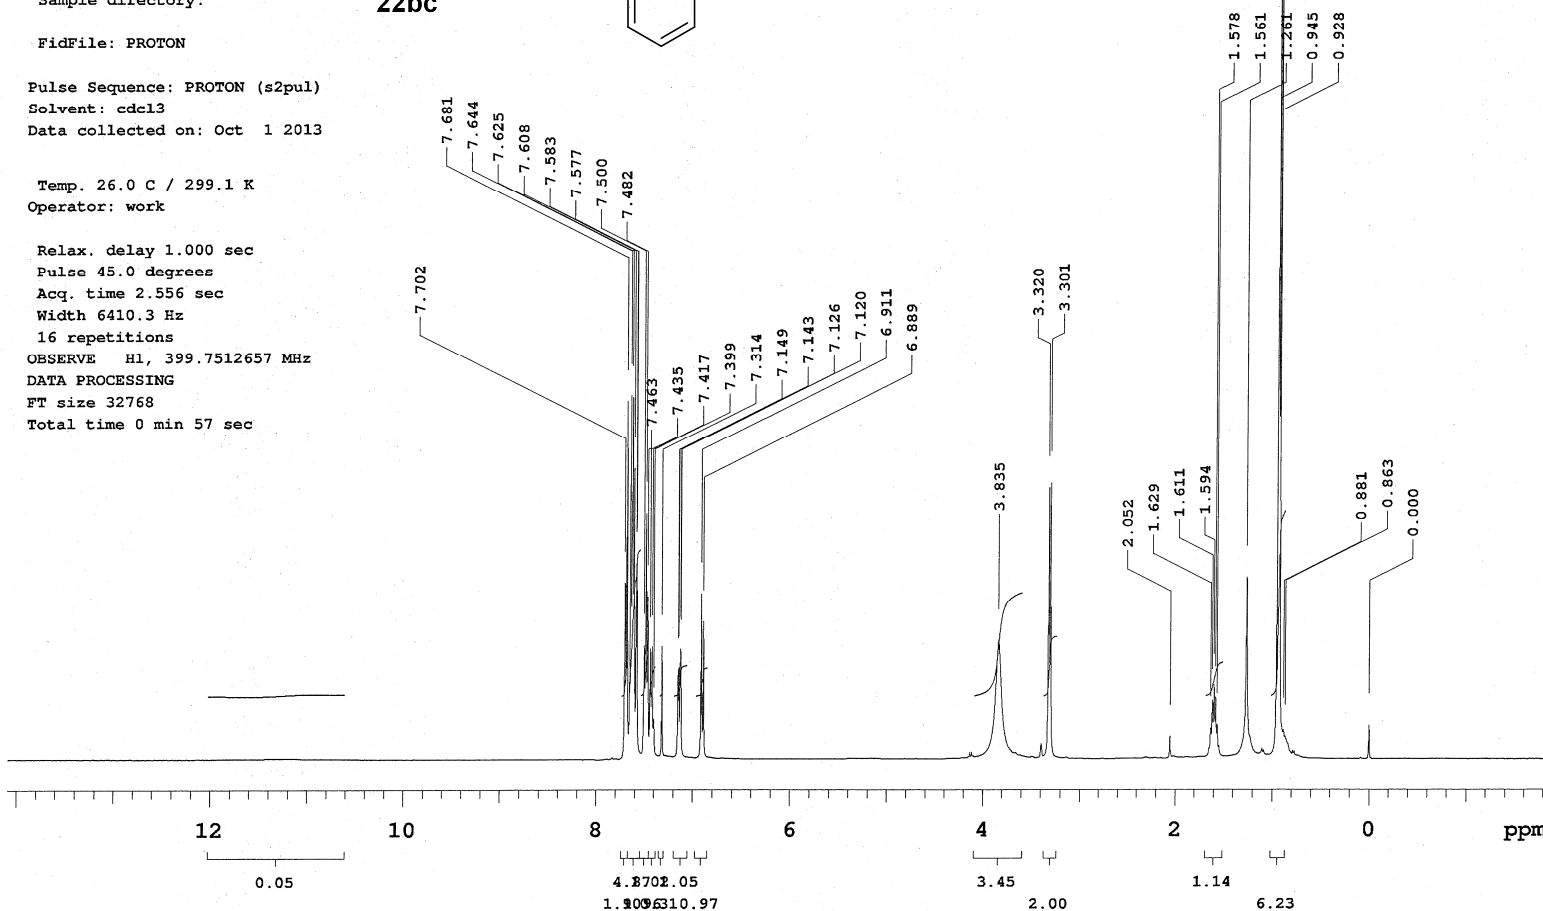

Sample Name:  
jy-5-300p-c13-cdcl3  
Data Collected on:  
400mr-vnmrs400  
Archive directory:

Sample directory:  
FidFile: CARBON

Pulse Sequence: CARBON (s2pul)  
Solvent: cdcl3  
Data collected on: Oct 1 2013

Temp. 26.0 C / 299.1 K  
Operator: work

Relax. delay 1.000 sec  
Pulse 45.0 degrees  
Acq. time 1.285 sec  
Width 25510.2 Hz  
250 repetitions  
OBSERVE C13, 100.5175428 MHz  
DECOUPLE H1, 399.7532925 MHz  
Power 39 dB  
continuously on  
WALTZ-16 modulated  
DATA PROCESSING  
Line broadening 0.5 Hz  
FT size 65536  
Total time 9 min 31 sec

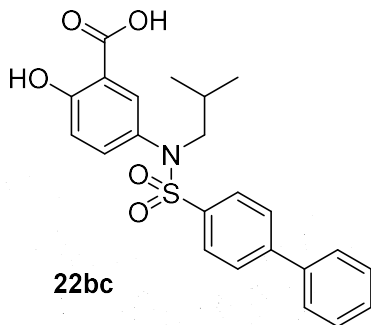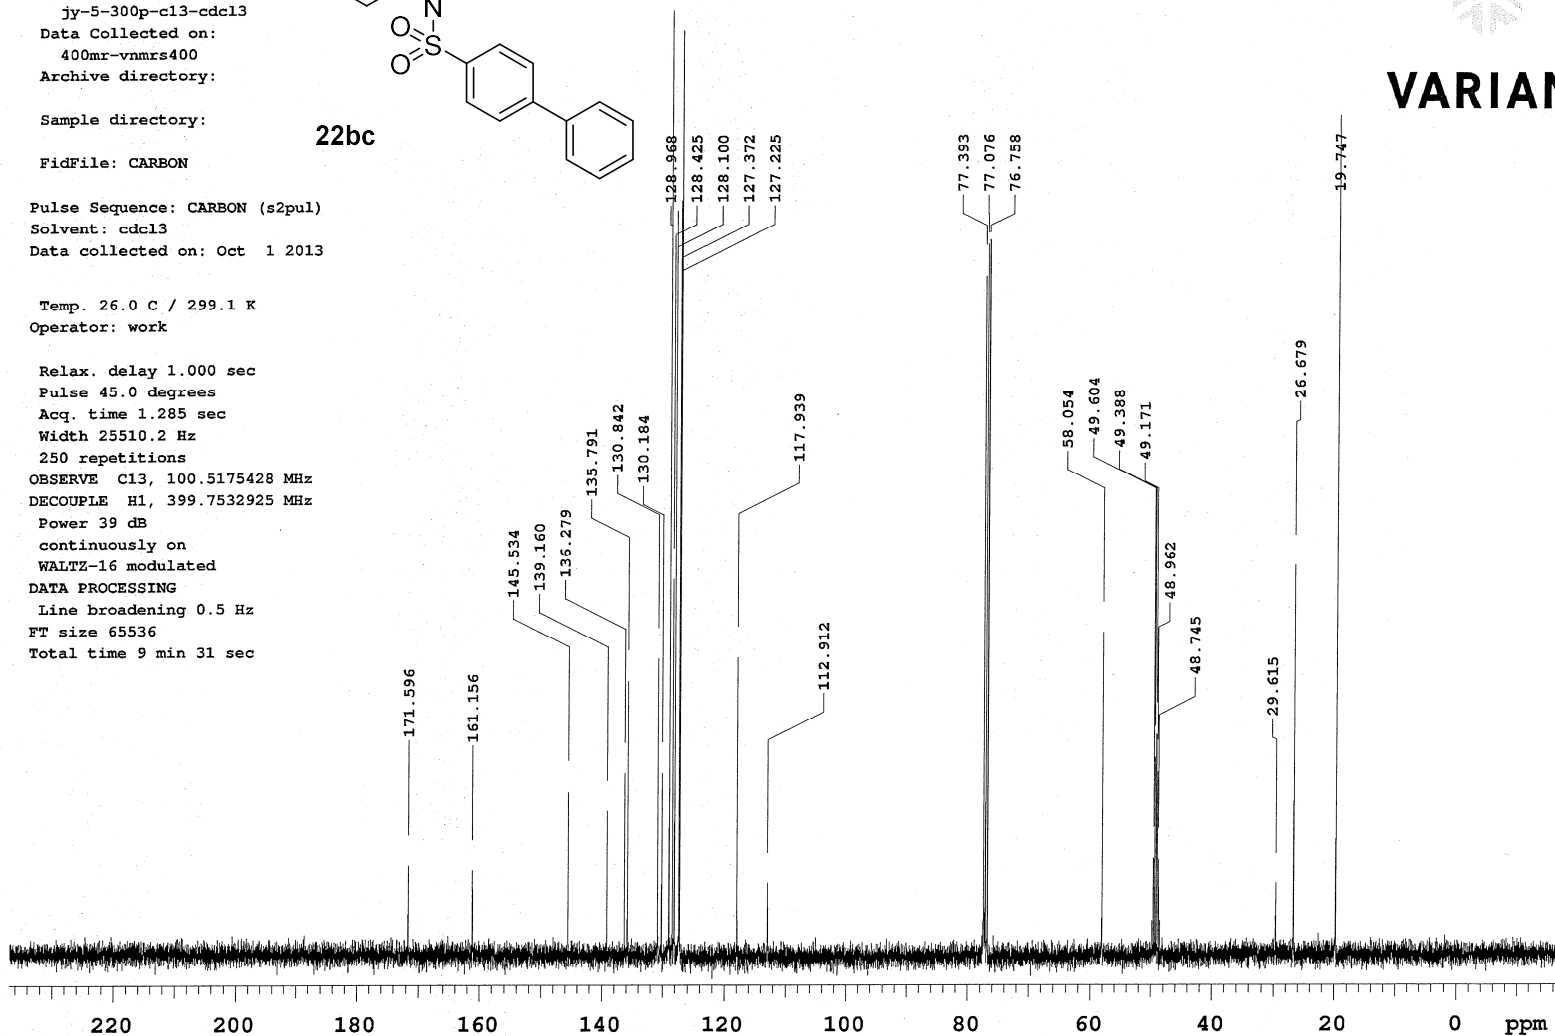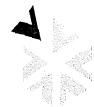

VARIAN
